# Supplementary material for: Asymmetric synthesis of chiral 1,2-oxazinane and hexahydropyridazin spirocyclic scaffolds by organocatalytic [4 + 2] cycloaddition
Source: Royal Society of Chemistry journal article supplement (doi:10.1039/d2ra02759c), 2022-01-01
Supplement: d2ra02759c1.pdf [file d2ra02759c1.pdf]

## Supporting Information

### Asymmetric synthesis of chiral 1,2-oxazinanone and hexahydropyridazinone spirocyclic scaffolds by organocatalytic [4+2] cycloaddition

Heng-Zhi Tian<sup>a</sup>, Qing-Gang Tang<sup>a</sup>, Guo-Qiang Lin<sup>ab</sup> and Xing-Wen Sun<sup>\*ab</sup>

<sup>a</sup> Department of Chemistry, Fudan University, Shanghai 200433, China

<sup>b</sup> Key Laboratory of Synthetic Chemistry of Natural Substances, Shanghai Institute of Organic Chemistry, University of Chinese Academy of Sciences, Chinese Academy of Sciences, 345 Lingling Road, Shanghai 200032, China

E-mail: sunxingwen@fudan.edu.cn

|                                                   |      |
|---------------------------------------------------|------|
| Table of contents                                 | page |
| 1. General information                            | S1   |
| 2. General procedure                              | S1   |
| 3. Analytical data of the products                | S6   |
| 4. <sup>1</sup> H and <sup>13</sup> C NMR spectra | S31  |
| 5. X-ray data of the product                      | S73  |

## 1. General Information

All reagents and all solvents were obtained from commercial suppliers and used without further purification except as indicated below. The silica gel (300-400 mesh) was used for column chromatography and TLC inspections were on silica gel GF 254 plates (0.25 mm layer thickness). NMR spectra were all recorded on a Bruker AM400 (400 MHz) spectrometer. Chemical shifts are reported in  $\delta$  ppm referenced to an internal SiMe<sub>4</sub> standard for <sup>1</sup>H NMR and chloroform-d ( $\delta$  77.16) for <sup>13</sup>C NMR. Enantioselectivities were determined by high-performance liquid chromatography (HPLC) with an Agilent-1260 intelligent uv/vis detector ( $\lambda$  = 214 nm, 220nm or 254 nm) and a Daicel IA. Optical rotations were measured in CH<sub>2</sub>Cl<sub>2</sub> or CHCl<sub>3</sub> on a Pekin-Elmer 241MC automatic polarimeter. HRESIMS were recorded on an Agilent 6210 TOF LC/MS equipped with an electrospray ionization (ESI) probe operating in positive or negative ion mode.

## 2. General procedure

### General procedure A: the synthesis of methyleneindolinones 1a-m:

Methyleneindolinones **1** were prepared according to the following representative procedure.<sup>2</sup>

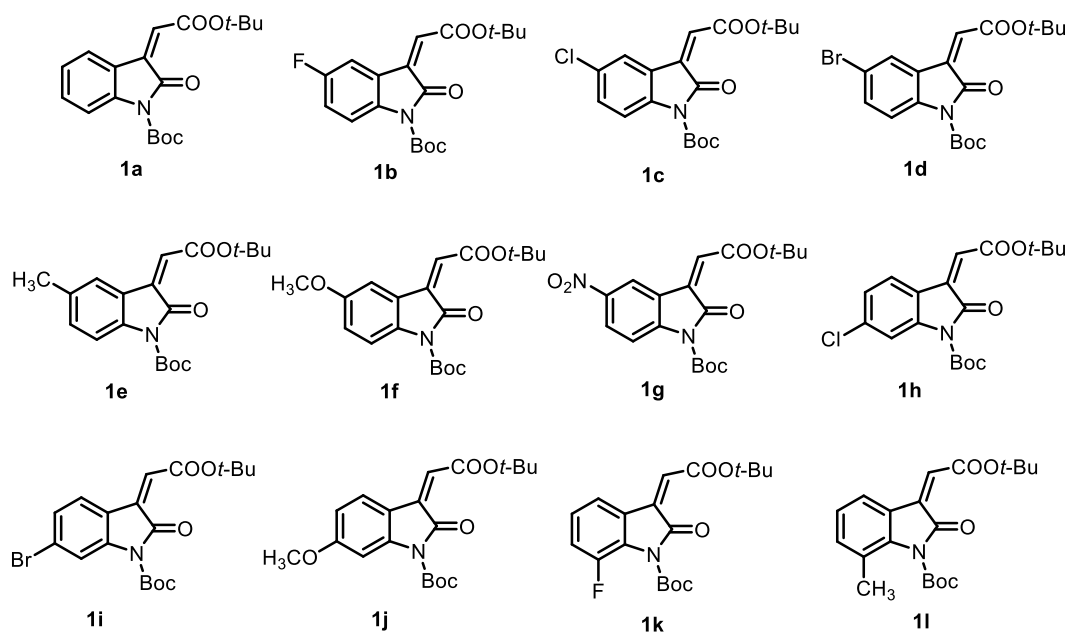

### General procedure B: the synthesis of $\gamma$ -aminoxy- $\alpha,\beta$ -unsaturated ester 2a-c:

$\gamma$ -aminoxy- $\alpha,\beta$ -unsaturated ester **2** were prepared according to the following representative procedure.<sup>1</sup>

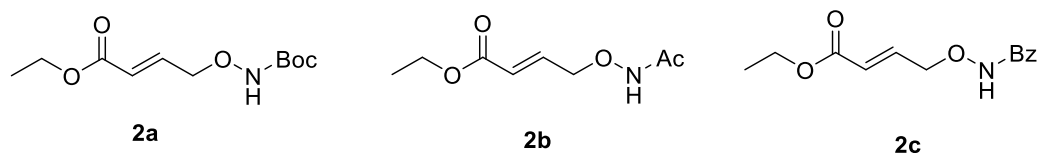

**General procedure C: the synthesis of fumaric acid monoester monoamide 6a–c:**

**Fumaric acid monoester monoamide 6** were prepared according to the following representative methods.

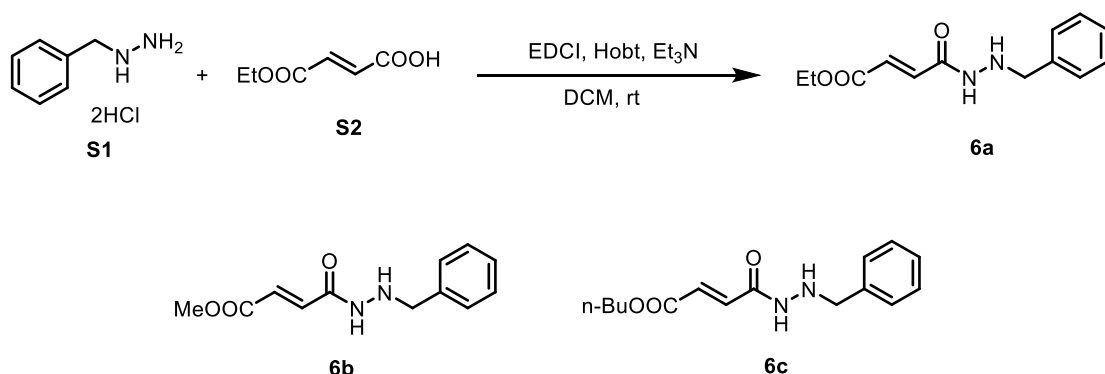

To a solution of **S2** (10.0 mmol) in DCM (25 mL) was added EDCI (11.0mmol) and Hobt(11mmol) under ice bath. After 30 min, **S1**(10.0 mmol) was added into the solution, followed by the addition of Et<sub>3</sub>N(30.0 mmol). Then the reaction was warmed to room temperature and stirred overnight. After the reaction was complete (monitored by TLC), it was quenched with water. The mixture was extracted with DCM (30 mL x 2). The organic layer was washed with brine, dried over Na<sub>2</sub>SO<sub>4</sub>, filtered and concentrated by rotary evaporation. Then the residue was purified by silica gel column chromatography (PE/EtOAc = 3/1) to afford the desired product **6a**.

**General procedure D: the synthesis of Chiral 1,2-oxazinane Spirocyclic 4:**

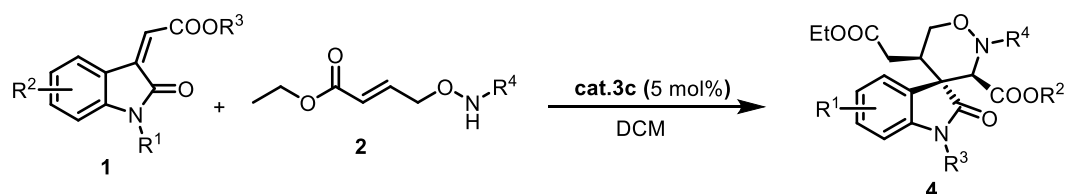

A solution of **2** (0.20 mmol), **1** (0.22 mmol) and Cat **3c** (0.05 mmol) in CH<sub>2</sub>Cl<sub>2</sub> (0.4 mL) was stirred at room temperature (25 °C) for 48 h. The mixture was concentrated under reduced pressure and the residue was purified via flash chromatograph on silica gel (EtOAc/Petrol Ether = 1/3, v/v as eluent) to afford the desired product **4**.

**General procedure E: the synthesis of Chiral Hexahydropyridazin Spirocycle 7:**

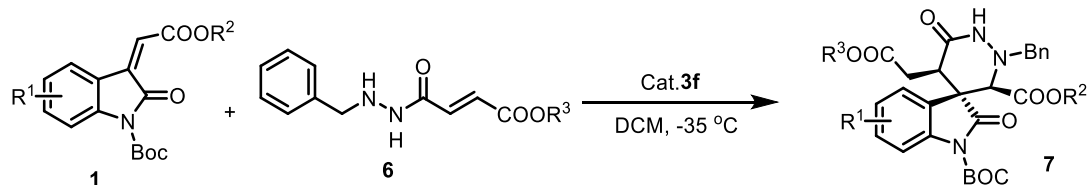

A solution of **6** (0.20 mmol), **1** (0.24 mmol) and Cat.**3f** (0.03 mmol) in CH<sub>2</sub>Cl<sub>2</sub> (0.2 mL) was stirred at -35 °C for 10-14d. The mixture was concentrated under reduced pressure and the residue was purified via flash chromatograph on silica gel (EtOAc/Petrol Ether = 1/3, v/v as eluent) to afford the desired product **7**.

### Transformations of product **4a**:

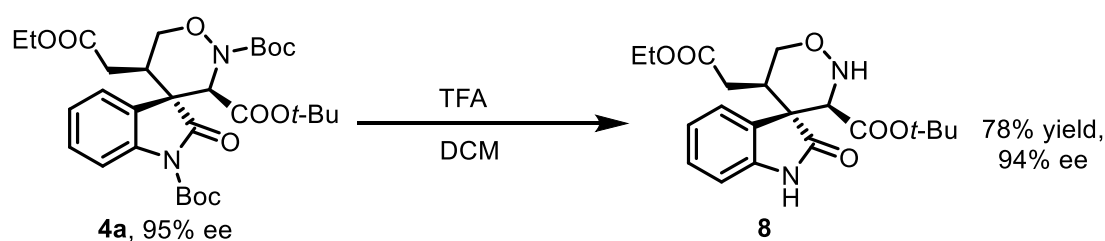

To a solution of **4a** (0.2 mmol) in DCM (2.0 mL) was added TFA (2.0 mmol). The resultant reaction solution was allowed to stir 2h at room temperature before the reaction was quenched by the addition of saturated aqueous Na<sub>2</sub>CO<sub>3</sub> and extracted with CH<sub>2</sub>Cl<sub>2</sub> (3 x 20 mL). The combined organic fractions were dried over Na<sub>2</sub>SO<sub>4</sub>, filtered and concentrated by rotary evaporation. Then the residue was purified by silica gel column chromatography (PE/EtOAc = 3/1) to afford the desired product **8**.

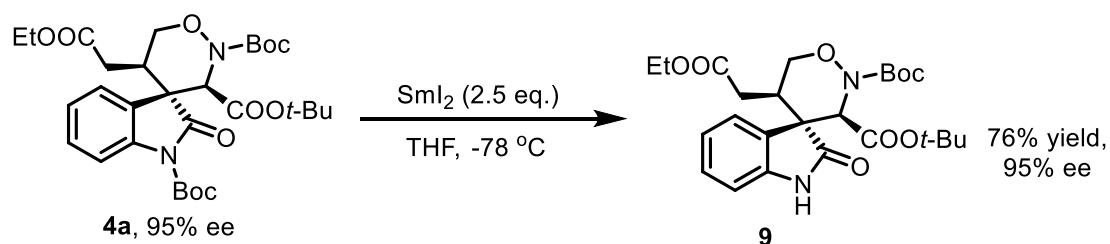

To a stirring solution of **4a** (0.1 mmol) in degassed dry methanol (1 mL) was added samarium iodide (0.1 M in THF, 2.5 equiv. ) slowly at -78 °C. After stirring for 30 min, the solvent was warmed to room temperature, and saturated aqueous Na<sub>2</sub>S<sub>2</sub>O<sub>3</sub> (10 mL) were added. The aqueous layer was extracted with EA (10 ml x 3), and the organic layers were combined and dried over anhydrous sodium sulfate (Na<sub>2</sub>SO<sub>4</sub>). After filtration and concentration, the obtained crude product was purified by column chromatography (PE/EtOAc = 3/1) to afford **9**.

### Transformations of product **7a**:

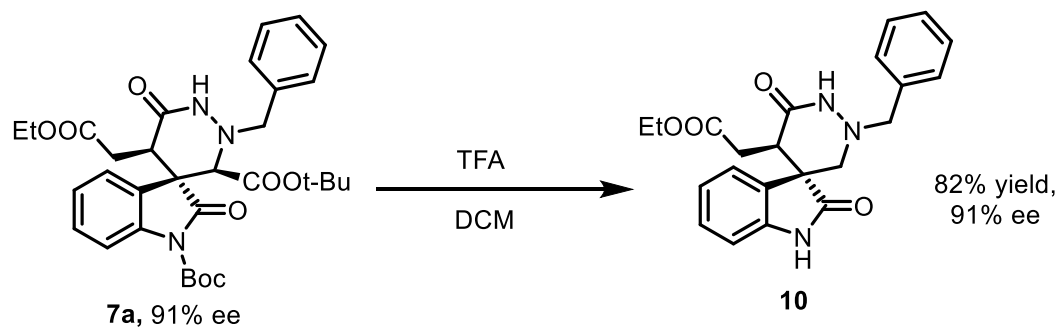

To a solution of **7a** (0.2 mmol) in DCM (2.0 mL) was added TFA (1 ml). The resultant reaction solution was allowed to stir overnight at room temperature before the reaction was quenched by the addition of saturated aqueous  $\text{Na}_2\text{CO}_3$  and extracted with  $\text{CH}_2\text{Cl}_2$  (3 x 20 mL). The combined organic fractions were dried over  $\text{Na}_2\text{SO}_4$ , filtered and concentrated by rotary evaporation. Then the residue was purified by silica gel column chromatography (PE/EtOAc = 1/1) to afford the desired product **10**.

## References:

1. Drelich, P.; Moczulski, M.; Albrecht, Ł. *Org. Lett.* **2017**, *19*, 3143–3146.
2. Tang, Q-G.; Cai, S-L.; Wang, C-C.; Lin, G-Q.; Sun, X-W. *Org. Lett.* **2020**, *22*, 3351–3355.

### 3. Analytical data of the products

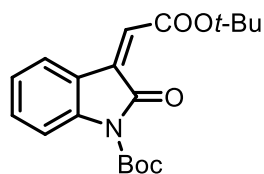

**1a**,  $^1\text{H NMR}$  (400 MHz,  $\text{CDCl}_3$ )  $\delta$  8.54 (d,  $J = 7.8$  Hz, 1H), 7.68 – 7.25 (m, 1H), 7.07 (t,  $J = 7.8$  Hz, 1H), 6.85 (d,  $J = 6.0$  Hz, 2H), 1.59 (m, 18H).

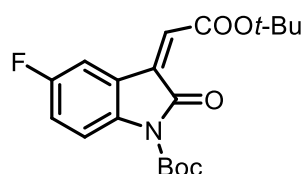

**1b**,  $^1\text{H NMR}$  (400 MHz,  $\text{CDCl}_3$ )  $\delta$  8.45 (d,  $J = 9.0$  Hz, 1H), 7.89 (dd,  $J = 8.8, 4.6$  Hz, 1H), 7.13 (s, 1H), 6.90 (s, 1H), 1.65 (s, 9H), 1.57 (s, 9H).

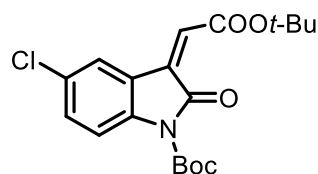

**1c**,  $^1\text{H NMR}$  (400 MHz,  $\text{CDCl}_3$ )  $\delta$  8.67 (s, 1H), 7.87 (d,  $J = 8.8$  Hz, 1H), 7.39 (d,  $J = 8.8$  Hz, 1H), 6.89 (s, 1H), 1.64 (s, 9H), 1.58 (s, 9H).

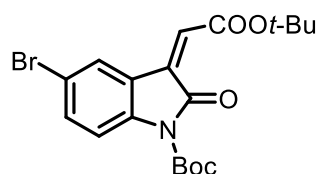

**1d**,  $^1\text{H NMR}$  (400 MHz,  $\text{CDCl}_3$ )  $\delta$  8.81 (s, 1H), 7.81 (d,  $J = 8.8$  Hz, 1H), 7.54 (d,  $J = 8.8$  Hz, 1H), 6.88 (s, 1H), 1.70 – 1.55 (m, 18H).

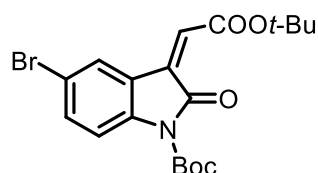

**1e**,  $^1\text{H NMR}$  (400 MHz,  $\text{CDCl}_3$ )  $\delta$  8.43 (s, 1H), 7.76 (d,  $J = 8.4$  Hz, 1H), 7.30 – 7.17 (m, 1H), 6.84 (s, 1H), 2.38 (s, 3H), 1.65 (s, 9H), 1.58 (s, 9H).

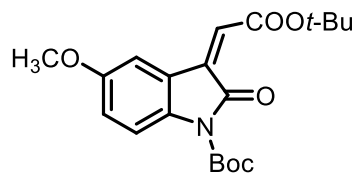

**1f**,  $^1\text{H NMR}$  (400 MHz,  $\text{CDCl}_3$ )  $\delta$  8.29 (d,  $J = 2.0$  Hz, 1H), 7.80 (d,  $J = 8.8$  Hz, 1H), 6.97 (dd,  $J = 8.8$ , 2.0 Hz, 1H), 6.86 (s, 1H), 3.85 (s, 3H), 1.68 – 1.54 (m, 18H).

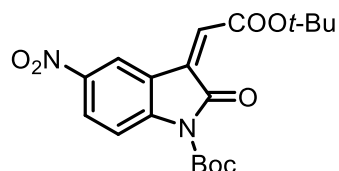

**1g**,  $^1\text{H NMR}$  (400 MHz,  $\text{CDCl}_3$ )  $\delta$  9.54 (s, 1H), 8.34 (d,  $J = 9.0$  Hz, 1H), 8.10 (d,  $J = 9.0$  Hz, 1H), 7.00 (s, 1H), 1.67 – 1.59 (m, 18H).

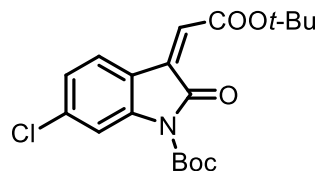

**1h**,  $^1\text{H NMR}$  (400 MHz,  $\text{CDCl}_3$ )  $\delta$  8.63 (d,  $J = 8.4$  Hz, 1H), 7.97 (s, 1H), 7.17 (d,  $J = 8.4$  Hz, 1H), 6.86 (s, 1H), 1.65 (s, 9H), 1.57 (s, 9H).

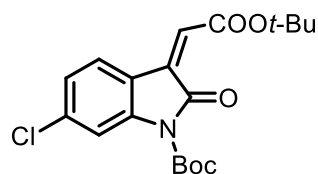

**1i**,  $^1\text{H NMR}$  (400 MHz,  $\text{CDCl}_3$ )  $\delta$  8.55 (d,  $J = 8.4$  Hz, 1H), 8.14 (s, 1H), 7.34 (d,  $J = 8.4$  Hz, 1H), 6.88 (s, 1H), 1.65 (s, 9H), 1.58 (s, 9H).

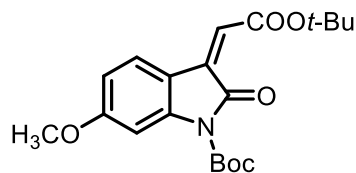

**1j**,  $^1\text{H NMR}$  (400 MHz,  $\text{CDCl}_3$ )  $\delta$  8.68 (d,  $J = 8.8$  Hz, 1H), 7.53 (d,  $J = 2.4$  Hz, 1H), 6.77 – 6.68 (m, 2H), 3.90 (s, 3H), 1.65 (s, 9H), 1.58 (s, 9H).

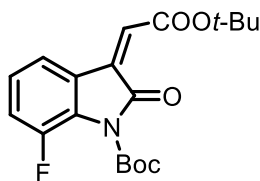

**1k**,  $^1\text{H NMR}$  (400 MHz,  $\text{CDCl}_3$ )  $\delta$  8.44 (d,  $J = 7.0$  Hz, 1H), , 7.18 (d,  $J = 7.8$  Hz, 2H), 6.92 (s, 1H), 1.65 – 1.54 (m, 18H).

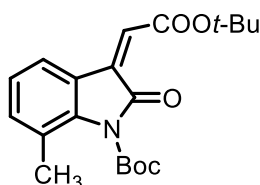

**1l**,  $^1\text{H NMR}$  (400 MHz,  $\text{CDCl}_3$ )  $\delta$  8.46 (d,  $J = 7.8$  Hz, 1H), 7.30 – 7.17 (m, 1H), 7.11 (t,  $J = 7.8$  Hz, 1H), 6.82 (s, 1H), 2.23 (s, 3H), 1.67 – 1.56 (m, 18H).

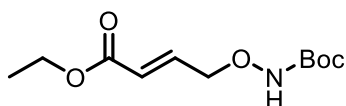

**2a**,  $^1\text{H NMR}$  (400 MHz,  $\text{CDCl}_3$ )  $\delta$  7.37 (s, 1H), 6.99 – 6.95 (m, 1H), 6.06 (d,  $J = 15.8$  Hz, 1H), 4.52 (d,  $J = 5.2$  Hz, 2H), 4.21 (q,  $J = 7.2$  Hz, 2H), 1.49 (s, 9H), 1.30 (t,  $J = 7.2$  Hz, 3H).

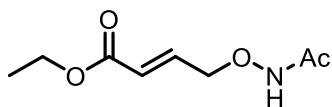

**2b**,  $^1\text{H NMR}$  (400 MHz,  $\text{CDCl}_3$ )  $\delta$  10.12 (s, 1H), 6.87 (dt,  $J = 15.8, 5.2$  Hz, 1H), 6.00 (d,  $J = 15.8$  Hz, 1H), 4.49 (d,  $J = 4.4$  Hz, 2H), 4.12 (dd,  $J = 14.2, 7.2$  Hz, 2H), 1.86 (s, 3H), 1.37 – 1.04 (m, 3H).

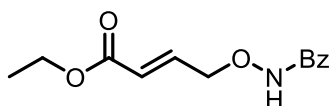

**2c**,  $^1\text{H NMR}$  (400 MHz,  $\text{CDCl}_3$ )  $\delta$  9.72 (s, 1H), 7.77 (dd,  $J = 24.2, 7.4$  Hz, 2H), 7.50 (t,  $J = 7.4$  Hz, 1H), 7.39 (t,  $J = 7.8$  Hz, 2H), 6.97 (dt,  $J = 15.8, 5.4$  Hz, 1H), 6.08 (d,  $J = 15.8$  Hz, 1H), 4.64 (dd,  $J = 5.4, 1.2$  Hz, 2H), 4.16 (q,  $J = 7.2$  Hz, 2H), 1.36 – 1.18 (m, 3H).

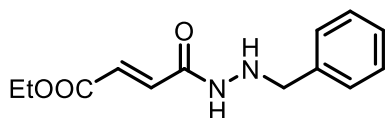

**6a**,  $^1\text{H NMR}$  (400 MHz,  $\text{CDCl}_3$ )  $\delta$  7.44 – 7.11 (m, 5H), 6.93 – 6.71 (m, 2H), 4.36 – 4.14 (m, 2H), 4.04 (d,  $J = 8.8$  Hz, 2H), 1.50 – 1.19 (m, 3H).

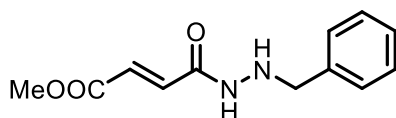

**6b**,  $^1\text{H NMR}$  (400 MHz,  $\text{CDCl}_3$ )  $\delta$  7.38 – 7.28 (m, 5H), 7.04 – 6.76 (m, 2H), 4.05 (s, 2H), 3.82 (s, 2H).



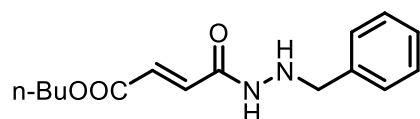

**6c**,  $^1\text{H NMR}$  (400 MHz,  $\text{CDCl}_3$ )  $\delta$  7.44 – 7.31 (m, 5H), 6.84 (dt,  $J = 15.4, 11.6$  Hz, 2H), 4.25 – 4.18 (m, 2H), 4.05 (s, 2H), 1.77 – 1.59 (m, 2H), 1.55 – 1.34 (m, 2H), 1.10 – 0.90 (m, 3H).

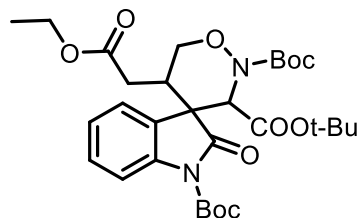

**4a**, yellow oil, 106 mg, 90% yield, >20:1 dr, 95% ee (Chiralcel IA column,  $i\text{-PrOH/n-hexane} = 20/80$ , 1.0 mL/min,  $\lambda = 210$  nm,  $t_{\text{major}} = 8.03$  min,  $t_{\text{minor}} = 4.71$  min);  $[\alpha]_{\text{D}}^{25} = -2.4$  ( $c = 1.0$ ,  $\text{CHCl}_3$ ).  $^1\text{H NMR}$  (400 MHz,  $\text{CDCl}_3$ )  $\delta$  7.90 (d,  $J = 8.4$  Hz, 1H), 7.59 (d,  $J = 7.6$  Hz, 1H), 7.34 (t,  $J = 7.6$  Hz, 1H), 7.14 (t,  $J = 7.6$  Hz, 1H), 4.98 (s, 1H), 4.70 (t,  $J = 9.2$ , 1H), 4.07-3.94 (m, 2H), 3.62 (t,  $J = 10.0$ , 1H), 3.07-2.92 (m, 1H), 2.15 (dd,  $J = 16.0, 2.4$  Hz, 1H), 1.68-1.57 (m, 10H), 1.46 (s, 9H), 1.16 (t,  $J = 7.2$ , 3H), 0.90 (s, 9H) ppm;  $^{13}\text{C NMR}$  (100 MHz,  $\text{CDCl}_3$ )  $\delta$  176.2, 170.0, 165.6, 154.2, 148.7, 140.9, 129.4, 127.3, 125.2, 124.6, 114.8, 85.0, 82.4, 82.3, 70.6, 65.7, 61.0, 53.1, 36.7, 33.4, 28.1, 28.1, 28.0, 26.9, 14.0 ppm; **HRMS** (ESI)  $m/z$  calcd for  $\text{C}_{30}\text{H}_{42}\text{N}_2\text{O}_{10}$   $[\text{M}+\text{Na}]^+$  613.2732, found 613.2731.

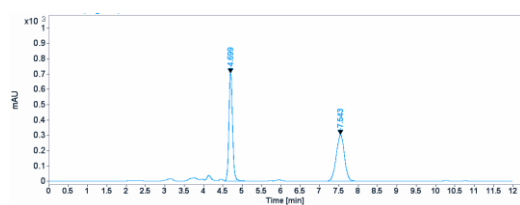

Signal: DAD1 C, Sig=210.4 Ref=off

| RT [min] | Width [min] | Area [mAU·S] | Height [mAU] | Area%   |
|----------|-------------|--------------|--------------|---------|
| 4.699    | 0.100       | 4809.024     | 705.936      | 51.0338 |
| 7.543    | 0.231       | 4422.288     | 301.693      | 48.9662 |
| Sum      |             | 9031.3126    |              |         |

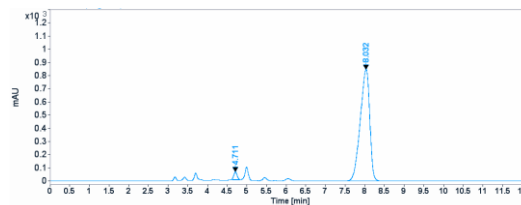

Signal: DAD1 C, Sig=210.4 Ref=off

| RT [min] | Width [min] | Area [mAU·S] | Height [mAU] | Area%   |
|----------|-------------|--------------|--------------|---------|
| 4.711    | 0.099       | 339.253      | 57.160       | 2.3423  |
| 8.032    | 0.261       | 14144.621    | 945.081      | 97.6577 |
| Sum      |             | 14483.8740   |              |         |

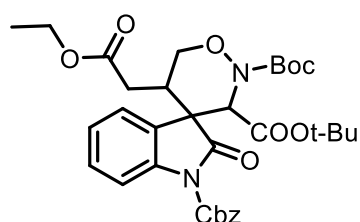

**4b**, yellow oil, 66 mg, 53% yield, >20:1 dr, 96% ee (Chiralcel IA column,  $i\text{-PrOH/n-hexane} = 20/80$ , 1.0 mL/min,  $\lambda = 210$  nm,  $t_{\text{major}} = 18.80$  min,  $t_{\text{minor}} = 7.86$  min);  $[\alpha]_{\text{D}}^{25} = -0.5$  ( $c = 1.0$ ,  $\text{CHCl}_3$ ).  $^1\text{H NMR}$  (400 MHz,  $\text{CDCl}_3$ )  $\delta$  7.98 (d,  $J = 8.0$  Hz, 1H), 7.62 (d,  $J = 7.6$  Hz, 1H), 7.55-7.46 (m, 2H), 7.44-7.31 (m, 4H), 7.17 (t,  $J = 7.6$  Hz, 1H), 5.46 (dd,  $J = 21.6, 12.0$  Hz, 2H), 5.00 (s, 1H), 4.71 (t,  $J = 8.8$  Hz, 1H), 4.07-3.90 (m, 2H), 3.63 (t,  $J = 9.6$  Hz, 1H), 3.09-2.97 (m, 1H), 2.18-2.07 (m, 1H), 1.67-1.57 (m, 1H), 1.48 (s, 10H), 1.15 (t,  $J = 7.2$  Hz, 3H), 0.84 (s, 9H) ppm;  $^{13}\text{C NMR}$  (100 MHz,  $\text{CDCl}_3$ )  $\delta$  176.0, 170.0, 165.5, 154.2,

150.4, 140.5, 134.7, 129.6, 128.7, 128.7, 128.3, 127.4, 125.6, 124.7, 115.0, 82.6, 82.5, 70.6, 69.1, 65.7, 61.0, 53.3, 36.9, 33.4, 28.2, 26.9, 14.0 ppm; **HRMS (ESI)**  $m/z$  calcd for  $C_{33}H_{40}N_2O_{10}$   $[M+Na]^+$  647.2575, found 647.2572.

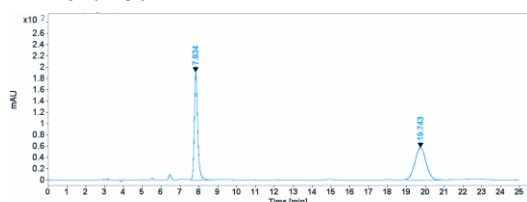

Signal: DAD1 C, Sig=210.4 Ref=off

| RT [min] | Width [min] | Area [mAU·S] | Height [mAU] | Area%   |
|----------|-------------|--------------|--------------|---------|
| 7.834    | 0.192       | 2395.876     | 190.899      | 50.7317 |
| 19.743   | 0.633       | 2326.785     | 56.961       | 49.2683 |
| Sum      |             | 4722.6409    |              |         |

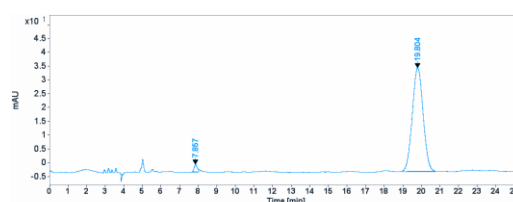

Signal: DAD1 C, Sig=210.4 Ref=off

| RT [min] | Width [min] | Area [mAU·S] | Height [mAU] | Area%   |
|----------|-------------|--------------|--------------|---------|
| 7.857    | 0.208       | 33.435       | 2.709        | 2.1570  |
| 19.804   | 0.627       | 1516.635     | 37.542       | 97.8430 |
| Sum      |             | 1550.0696    |              |         |

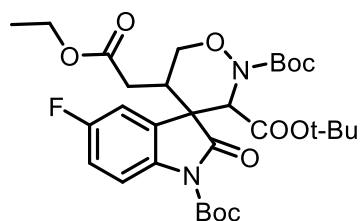

**4c**, yellow oil, 115 mg, 95% yield, >20:1 dr, 96% ee (Chiralcel IA column, *i*-PrOH/*n*-hexane = 20/80, 1.0 mL/min,  $\lambda = 210$  nm,  $t_{\text{major}} = 9.91$  min,  $t_{\text{minor}} = 4.77$  min);  $[\alpha]_D^{25} = -0.5$  ( $c = 1.0$ ,  $CHCl_3$ ).  **$^1H$  NMR** (400 MHz,  $CDCl_3$ )  $\delta$  7.89 (dd,  $J = 8.8, 4.2$  Hz, 1H), 7.35 (d,  $J = 8.4$  Hz, 1H), 7.03 (t,  $J = 8.8$  Hz, 1H), 4.94 (s, 1H), 4.68 (t,  $J = 8.8$  Hz, 1H), 4.00 (q,  $J = 6.8$  Hz, 2H), 3.58 (t,  $J = 10.0$  Hz, 1H), 2.97 (q,  $J = 9.6, 9.2$  Hz, 1H), 2.19-2.06 (m, 1H), 1.64-1.55 (m, 10H), 1.44 (s, 9H), 1.15 (t,  $J = 7.2$  Hz, 3H), 0.93 (s, 9H) ppm;  **$^{13}C$  NMR** (100 MHz,  $CDCl_3$ )  $\delta$  175.6, 169.8, 165.3, 160.2 (d,  $J = 243.6$  Hz), 154.0, 148.6, 136.8 (d,  $J = 2.8$  Hz), 126.4 (d,  $J = 8.4$  Hz), 116.1 (d,  $J = 7.8$  Hz), 115.9 (d,  $J = 22.8$  Hz), 115.0 (d,  $J = 25.6$  Hz), 85.2, 82.6, 82.5, 70.6, 65.5, 61.0, 53.4, 36.7, 33.3, 28.1, 28.0, 26.9, 14.0 ppm;  **$^{19}F$  NMR** (377 MHz,  $CDCl_3$ )  $\delta$  -116.4 ppm; **HRMS (ESI)**  $m/z$  calcd for  $C_{30}H_{41}FN_2O_{10}$   $[M+Na]^+$  631.2637, found 631.2648.

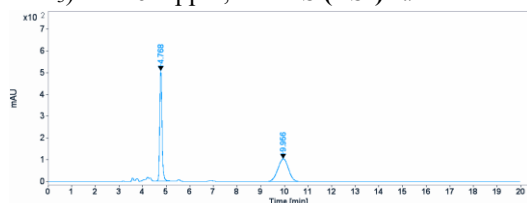

Signal: DAD1 C, Sig=210.4 Ref=off

| RT [min] | Width [min] | Area [mAU·S] | Height [mAU] | Area%   |
|----------|-------------|--------------|--------------|---------|
| 4.768    | 0.110       | 3325.345     | 505.807      | 50.3736 |
| 9.956    | 0.495       | 3276.025     | 104.233      | 49.6264 |
| Sum      |             | 6601.3708    |              |         |

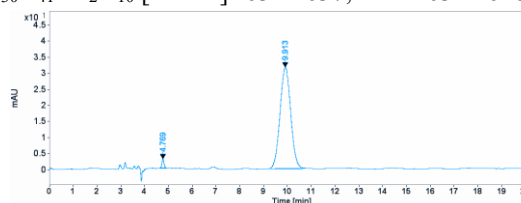

Signal: DAD1 C, Sig=210.4 Ref=off

| RT [min] | Width [min] | Area [mAU·S] | Height [mAU] | Area%   |
|----------|-------------|--------------|--------------|---------|
| 4.769    | 0.094       | 17.879       | 2.893        | 1.7872  |
| 9.913    | 0.480       | 982.522      | 31.512       | 98.2128 |
| Sum      |             | 1000.4018    |              |         |

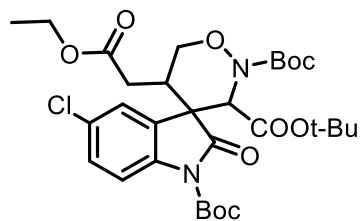

**4d**, yellow oil, 113 mg, 90% yield, >20:1 dr, 95% ee (Chiralcel IA column, i-PrOH/n-hexane = 20/80, 1.0 mL/min,  $\lambda = 210$  nm,  $t_{\text{major}} = 10.74$  min,  $t_{\text{minor}} = 4.25$  min);  $[\alpha]_{\text{D}}^{25} = 2.0$  ( $c = 1.0$ ,  $\text{CHCl}_3$ ).  $^1\text{H NMR}$  (400 MHz,  $\text{CDCl}_3$ )  $\delta$  7.86 (d,  $J = 8.8$  Hz, 1H), 7.60 (s, 1H), 7.31 (d,  $J = 8.8$  Hz, 1H), 4.94 (s, 1H), 4.68 (t,  $J = 8.8$  Hz, 1H), 4.00 (q,  $J = 7.2$  Hz, 2H), 3.59 (t,  $J = 10.0$  Hz, 1H), 2.98 (q,  $J = 9.6$  Hz, 1H), 2.17-2.06 (m, 1H), 1.66-1.57 (m, 10H), 1.45 (s, 9H), 1.16 (t,  $J = 6.8$  Hz, 3H), 0.94 (s, 9H) ppm;  $^{13}\text{C NMR}$  (100 MHz,  $\text{CDCl}_3$ )  $\delta$  175.3, 169.8, 165.4, 154.1, 148.5, 139.5, 131.0, 129.5, 127.3, 126.5, 116.1, 85.4, 82.7, 82.5, 70.6, 65.5, 61.1, 53.3, 36.8, 33.3, 28.2, 28.0, 27.0, 14.0 ppm; **HRMS (ESI)**  $m/z$  calcd for  $\text{C}_{30}\text{H}_{41}\text{ClN}_2\text{O}_{10}$   $[\text{M}+\text{Na}]^+$  647.2342, found 647.2331.

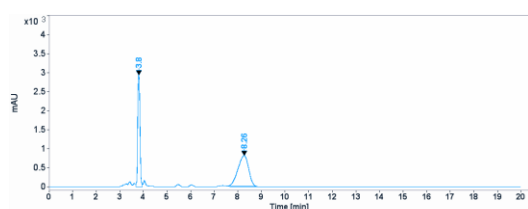

Signal: DAD1 C, Sig=210.4 Ref=360,100

| RT [min] | Width [min] | Area [mAU·S] | Height [mAU] | Area%   |
|----------|-------------|--------------|--------------|---------|
| 3.800    | 0.105       | 19381.105    | 2936.171     | 43.2374 |
| 8.260    | 0.523       | 25443.736    | 811.335      | 56.7626 |
| Sum      |             | 44824.8418   |              |         |

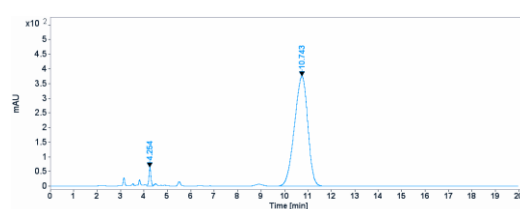

Signal: DAD1 C, Sig=210.4 Ref=360,100

| RT [min] | Width [min] | Area [mAU·S] | Height [mAU] | Area%   |
|----------|-------------|--------------|--------------|---------|
| 4.254    | 0.091       | 393.163      | 64.461       | 2.5262  |
| 10.743   | 0.619       | 14784.509    | 374.467      | 97.4738 |
| Sum      |             | 15167.6718   |              |         |

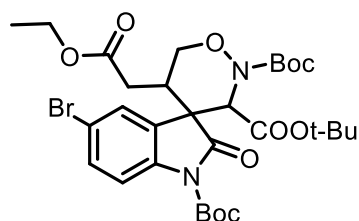

**4e**, yellow oil, 124 mg, 93% yield, >20:1 dr, 96% ee (Chiralcel IA column, i-PrOH/n-hexane = 20/80, 1.0 mL/min,  $\lambda = 210$  nm,  $t_{\text{major}} = 7.64$  min,  $t_{\text{minor}} = 4.21$  min);  $[\alpha]_{\text{D}}^{25} = 2.9$  ( $c = 1.0$ ,  $\text{CHCl}_3$ ).  $^1\text{H NMR}$  (400 MHz,  $\text{CDCl}_3$ )  $\delta$  7.80 (d,  $J = 8.8$  Hz, 1H), 7.72 (s, 1H), 7.46 (d,  $J = 8.8$  Hz, 1H), 4.93 (s, 1H), 4.67 (t,  $J = 9.2$  Hz, 1H), 3.99 (q,  $J = 7.2$  Hz, 2H), 3.58 (t,  $J = 10.0$  Hz, 1H), 3.04-2.87 (m, 1H), 2.17-2.03 (m, 1H), 1.67-1.55 (m, 10H), 1.44 (s, 9H), 1.15 (t,  $J = 7.2$  Hz, 3H), 0.93 (s, 9H) ppm;  $^{13}\text{C NMR}$  (100 MHz,  $\text{CDCl}_3$ )  $\delta$  175.2, 169.8, 165.3, 154.0, 148.4, 139.9, 132.4, 130.0, 126.8, 118.4, 116.5, 85.4, 82.7, 82.5, 77.4, 77.1, 76.8, 70.5, 65.5, 61.1, 53.2, 36.7, 33.3, 28.1, 27.9, 26.9, 14.0 ppm; **HRMS (ESI)**  $m/z$  calcd for  $\text{C}_{30}\text{H}_{41}\text{BrN}_2\text{O}_{10}$   $[\text{M}+\text{Na}]^+$  691.1837; 693.1818, found 691.1826; 693.1812.

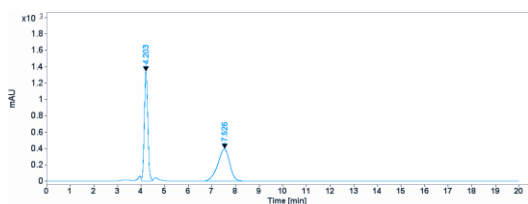

Signal: DAD1 C, Sig=210.4 Ref=off

| RT [min] | Width [min] | Area [mAU·S] | Height [mAU] | Area%   |
|----------|-------------|--------------|--------------|---------|
| 4.203    | 0.164       | 13777.761    | 1343.483     | 49.7907 |
| 7.526    | 0.532       | 13893.616    | 395.197      | 50.2093 |
| Sum      |             | 27671.3770   |              |         |

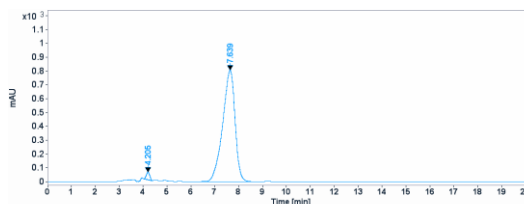

Signal: DAD1 C, Sig=210.4 Ref=off

| RT [min] | Width [min] | Area [mAU·S] | Height [mAU] | Area%   |
|----------|-------------|--------------|--------------|---------|
| 4.205    | 0.160       | 532.132      | 55.359       | 1.8021  |
| 7.639    | 0.546       | 28996.404    | 805.696      | 98.1979 |
| Sum      |             | 29528.5359   |              |         |

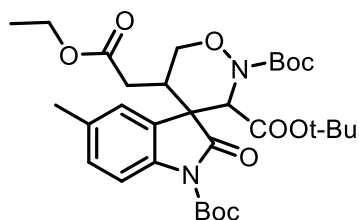

**4f**, yellow oil, 85 mg, 70% yield, >20:1 dr, 95% ee (Chiralcel IA column, i-PrOH/n-hexane = 20/80, 1.0 mL/min,  $\lambda = 210$  nm,  $t_{\text{major}} = 8.98$  min,  $t_{\text{minor}} = 4.11$  min);  $[\alpha]_{\text{D}}^{25} = -1.1$  ( $c = 1.0$ ,  $\text{CHCl}_3$ ).  **$^1\text{H NMR}$**  (400 MHz,  $\text{CDCl}_3$ )  $\delta$  7.76 (d,  $J = 8.0$ , 1H), 7.41 (s, 1H), 7.13 (d,  $J = 8.4$  Hz, 1H), 4.97 (s, 1H), 4.69 (t,  $J = 8.8$ , 1H), 4.10-3.94 (m, 2H), 3.63 (t,  $J = 10.0$ , 1H), 2.99 (q,  $J = 10.2$  Hz, 1H), 2.27 (s, 3H), 2.19-2.10 (m, 1H), 1.63 (m, 10H), 1.46 (s, 9H), 1.17 (t,  $J = 7.2$ , 3H), 0.91 (s,  $J = 1.7$  Hz, 9H) ppm;  **$^{13}\text{C NMR}$**  (100 MHz,  $\text{CDCl}_3$ )  $\delta$  176.3, 170.1, 165.6, 154.3, 148.7, 138.4, 135.0, 129.7, 127.7, 124.5, 114.6, 84.8, 82.3, 82.3, 70.6, 65.7, 60.9, 53.1, 36.6, 33.4, 28.1, 28.04, 28.00, 27.97, 26.9, 21.0, 14.0 ppm; **HRMS (ESI)**  $m/z$  calcd for  $\text{C}_{31}\text{H}_{44}\text{N}_2\text{O}_{10}$   $[\text{M}+\text{Na}]^+$  627.2888, found 627.2883.

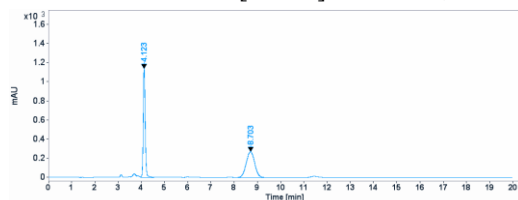

Signal: DAD1 C, Sig=210.4 Ref=off

| RT [min] | Width [min] | Area [mAU·S] | Height [mAU] | Area%   |
|----------|-------------|--------------|--------------|---------|
| 4.123    | 0.090       | 6670.075     | 1138.030     | 49.5278 |
| 8.703    | 0.402       | 6797.248     | 287.945      | 50.4722 |
| Sum      |             | 13467.3228   |              |         |

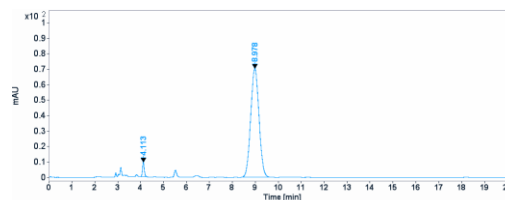

Signal: DAD1 C, Sig=210.4 Ref=off

| RT [min] | Width [min] | Area [mAU·S] | Height [mAU] | Area%   |
|----------|-------------|--------------|--------------|---------|
| 4.113    | 0.089       | 49.283       | 9.288        | 2.7015  |
| 8.978    | 0.395       | 1775.007     | 70.250       | 97.2985 |
| Sum      |             | 1824.2903    |              |         |

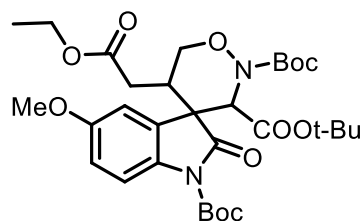

**4g**, yellow oil, 85 mg, 69% yield, >20:1 dr, 95% ee (Chiralcel IA column, i-PrOH/n-hexane = 20/80, 1.0 mL/min,  $\lambda = 210$  nm,  $t_{\text{major}} = 14.63$  min,  $t_{\text{minor}} = 4.23$  min);  $[\alpha]_{\text{D}}^{25} = 1.5$  ( $c = 1.0$ ,  $\text{CHCl}_3$ ).  **$^1\text{H NMR}$**  (400 MHz,  $\text{CDCl}_3$ )  $\delta$  7.81 (d,  $J = 9.2$  Hz, 1H), 7.18 (s, 1H), 6.86 (d,  $J = 8.8$  Hz, 1H), 4.98 (s, 1H), 4.70 (t,  $J = 8.8$  Hz, 1H), 4.06-3.93 (m, 2H), 3.72 (s, 3H), 3.62 (t,  $J = 10.0$  Hz, 1H), 2.97 (q,  $J = 10.0$  Hz, 1H), 2.15 (dt,  $J = 16.0$ , 2.8 Hz, 1H), 1.67-1.57 (s, 10H), 1.46 (s, 9H), 1.16 (t,  $J = 7.2$  Hz, 3H), 0.93 (s, 9H) ppm;  **$^{13}\text{C NMR}$**  (100 MHz,  $\text{CDCl}_3$ )  $\delta$  176.2, 170.1, 165.5, 157.5, 154.1, 148.7, 134.1, 125.8, 115.8, 115.0, 112.8, 84.8, 82.34, 82.27, 70.6, 65.5, 61.0, 55.9, 53.4, 36.6, 33.4, 28.1, 28.0, 26.9, 14.0 ppm; **HRMS (ESI)**  $m/z$  calcd for  $\text{C}_{31}\text{H}_{44}\text{N}_2\text{O}_{11}$   $[\text{M}+\text{Na}]^+$  643.2837, found 643.2830.

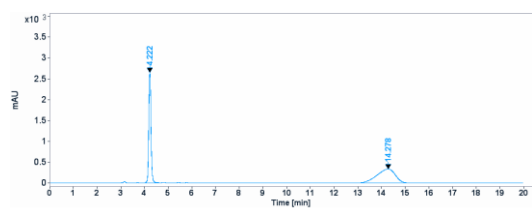

Signal: DAD1 C, Sig=210.4 Ref=360,100

| RT [min] | Width [min] | Area [mAU·S] | Height [mAU] | Area%   |
|----------|-------------|--------------|--------------|---------|
| 4.222    | 0.103       | 17568.924    | 2847.572     | 49.0033 |
| 14.278   | 0.856       | 18283.613    | 336.470      | 50.9967 |
| Sum      |             | 35852.5371   |              |         |

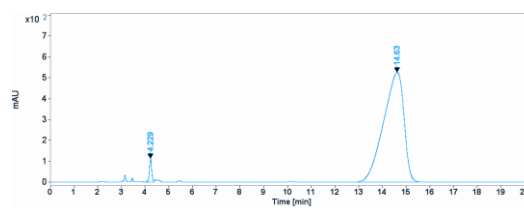

Signal: DAD1 C, Sig=210.4 Ref=360,100

| RT [min] | Width [min] | Area [mAU·S] | Height [mAU] | Area%   |
|----------|-------------|--------------|--------------|---------|
| 4.229    | 0.100       | 746.724      | 111.639      | 2.3209  |
| 14.630   | 0.923       | 31427.014    | 525.887      | 97.6791 |
| Sum      |             | 32173.7379   |              |         |

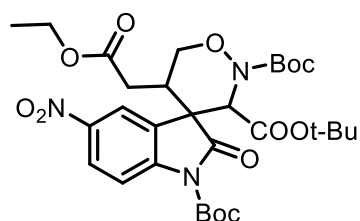

**4h**, yellow oil, 117 mg, 90% yield, >20:1 dr, 93% ee (Chiralcel IA column, *i*-PrOH/*n*-hexane = 20/80, 1.0 mL/min,  $\lambda = 210$  nm,  $t_{\text{major}} = 23.33$  min,  $t_{\text{minor}} = 4.41$  min);  $[\alpha]_{\text{D}}^{25} = 5.3$  ( $c = 1.0$ ,  $\text{CHCl}_3$ ). **<sup>1</sup>H NMR** (400 MHz,  $\text{CDCl}_3$ )  $\delta$  8.41 (s, 1H), 8.28 (d,  $J = 9.2$  Hz, 1H), 8.12 (d,  $J = 9.2$  Hz, 1H), 4.98 (s, 1H), 4.72 (t,  $J = 9.2$  Hz, 1H), 4.00 (q,  $J = 7.2$  Hz, 2H), 3.63 (t,  $J = 10.2$  Hz, 1H), 3.12-2.93 (m, 1H), 2.10 (dd,  $J = 16.2, 3.6$  Hz, 1H), 1.65-1.56 (m, 10H), 1.46 (s, 9H), 1.15 (t,  $J = 7.2$  Hz, 3H), 0.92 (s, 9H) ppm; **<sup>13</sup>C NMR** (100 MHz,  $\text{CDCl}_3$ )  $\delta$  175.0, 169.5, 165.2, 153.8, 148.2, 146.2, 145.1, 126.1, 125.8, 122.7, 115.1, 86.4, 83.0, 82.8, 77.4, 77.1, 76.8, 70.5, 65.4, 61.2, 53.2, 37.0, 33.2, 28.1, 28.0, 27.1, 14.0 ppm; **HRMS (ESI)**  $m/z$  calcd for  $\text{C}_{30}\text{H}_{41}\text{N}_3\text{O}_{12}$   $[\text{M}+\text{Na}]^+$  658.2582, found 658.2587.

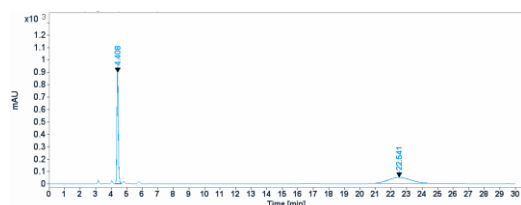

Signal: DAD1 C, Sig=210.4 Ref=360,100

| RT [min] | Width [min] | Area [mAU·S] | Height [mAU] | Area%   |
|----------|-------------|--------------|--------------|---------|
| 4.408    | 0.104       | 5603.733     | 894.319      | 50.9211 |
| 22.541   | 1.569       | 5400.969     | 50.698       | 49.0789 |
| Sum      |             | 11004.7319   |              |         |

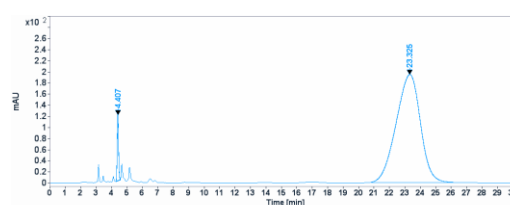

Signal: DAD1 C, Sig=210.4 Ref=360,100

| RT [min] | Width [min] | Area [mAU·S] | Height [mAU] | Area%   |
|----------|-------------|--------------|--------------|---------|
| 4.407    | 0.103       | 734.710      | 119.772      | 3.3453  |
| 23.325   | 1.686       | 21227.809    | 194.134      | 96.6547 |
| Sum      |             | 21962.5199   |              |         |

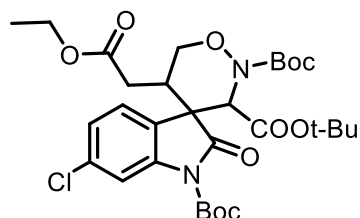

**4i**, yellow oil, 114 mg, 91% yield, >20:1 dr, 95% ee (Chiralcel IA column, *i*-PrOH/*n*-hexane = 20/80, 1.0 mL/min,  $\lambda = 210$  nm,  $t_{\text{major}} = 10.23$  min,  $t_{\text{minor}} = 4.80$  min);  $[\alpha]_{\text{D}}^{25} = -3.2$  ( $c = 1.0$ ,  $\text{CHCl}_3$ ). **<sup>1</sup>H NMR** (400 MHz,  $\text{CDCl}_3$ )  $\delta$  7.97 (s, 1H), 7.50 (d,  $J = 8.4$  Hz, 1H), 7.11 (d,  $J = 8.4$  Hz, 1H), 4.92 (s, 1H), 4.67 (t,  $J = 8.8$  Hz, 1H), 3.99 (q,  $J = 6.8$  Hz, 2H), 3.55 (t,  $J = 10.0$  Hz, 1H), 3.02-2.86 (m, 1H), 2.16-2.03 (m, 1H),

1.64-1.58 (m, 10H), 1.44 (s, 9H), 1.15 (t,  $J = 7.2$  Hz, 3H), 0.93 (s, 9H) ppm;  $^{13}\text{C}$  NMR (100 MHz,  $\text{CDCl}_3$ )  $\delta$  175.6, 169.8, 165.4, 154.1, 148.4, 141.8, 135.4, 128.3, 125.0, 122.9, 115.6, 85.5, 82.6, 82.5, 70.6, 65.6, 61.0, 52.9, 36.7, 33.3, 28.1, 28.0, 27.9, 27.0, 14.0 ppm; **HRMS (ESI)**  $m/z$  calcd for  $\text{C}_{30}\text{H}_{41}\text{ClN}_2\text{O}_{10}$   $[\text{M}+\text{Na}]^+$  647.2342, found 647.2344.

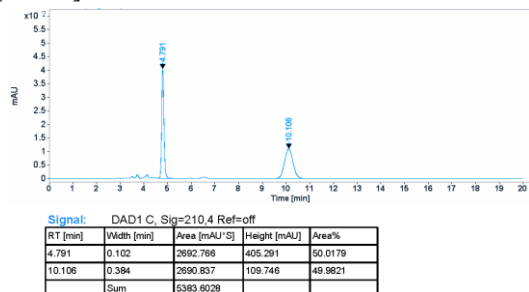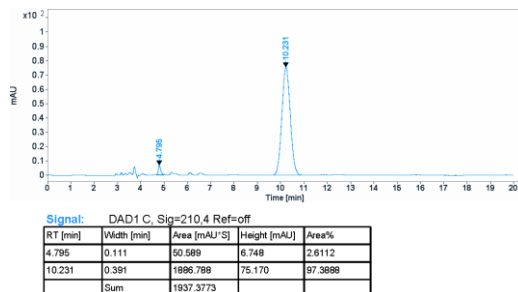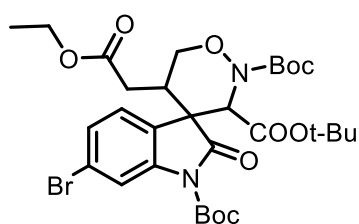

**4j**, yellow oil, 119 mg, 89% yield, >20:1 dr, 96% ee (Chiralcel IA column, i-PrOH/n-hexane = 20/80, 1.0 mL/min,  $\lambda = 210$  nm,  $t_{\text{major}} = 10.56$  min,  $t_{\text{minor}} = 4.87$  min);  $[\alpha]_{\text{D}}^{25} = -2.7$  (c = 1.0,  $\text{CHCl}_3$ ).  $^1\text{H}$  NMR (400 MHz,  $\text{CDCl}_3$ )  $\delta$  8.13 (s, 1H), 7.44 (d,  $J = 8.0$  Hz, 1H), 7.27 (d,  $J = 8.0$  Hz, 1H), 4.92 (s, 1H), 4.66 (t,  $J = 8.8$  Hz, 1H), 3.99 (q,  $J = 6.8$  Hz, 2H), 3.54 (t,  $J = 10.0$  Hz, 1H), 3.00-2.89 (m, 1H), 2.16-2.03 (m, 1H), 1.64-1.57 (m, 10H), 1.43 (s, 9H), 1.15 (t,  $J = 7.2$  Hz, 3H), 0.93 (s, 9H) ppm;  $^{13}\text{C}$  NMR (100 MHz,  $\text{CDCl}_3$ )  $\delta$  175.5, 169.8, 165.3, 154.1, 148.4, 141.9, 128.6, 128.0, 123.5, 123.3, 118.3, 85.6, 82.6, 82.5, 70.5, 65.5, 61.0, 53.0, 36.6, 33.3, 28.1, 27.9, 27.0, 14.0 ppm; **HRMS (ESI)**  $m/z$  calcd for  $\text{C}_{30}\text{H}_{41}\text{BrN}_2\text{O}_{10}$   $[\text{M}+\text{Na}]^+$  691.1837, 693.1818; found 691.1833, 693.1817.

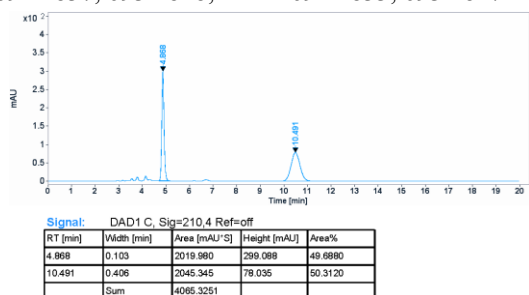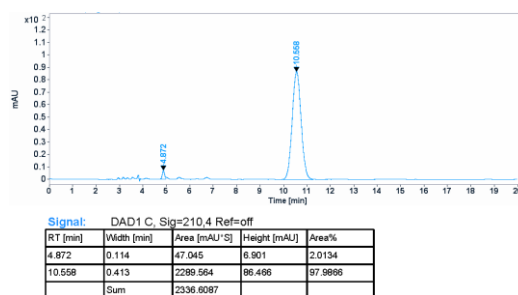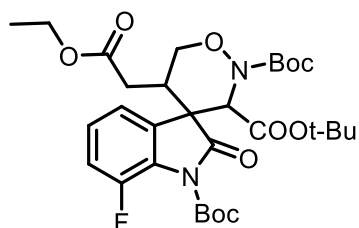

**4k**, yellow oil, 83 mg, 68% yield, >20:1 dr, 84% ee (Chiralcel IA column, i-PrOH/n-hexane = 20/80, 1.0 mL/min,  $\lambda = 210$  nm,  $t_{\text{major}} = 6.28$  min,  $t_{\text{minor}} = 5.39$  min);  $[\alpha]_{\text{D}}^{25} = -3.4$  (c = 1.0, CHCl<sub>3</sub>). **<sup>1</sup>H NMR** (400 MHz, CDCl<sub>3</sub>)  $\delta$  7.45-7.38 (m, 1H), 7.15-7.08 (m, 2H), 4.97 (s, 1H), 4.68 (t,  $J = 8.8$  Hz, 1H), 4.10-3.92 (m, 2H), 3.62-3.47 (t,  $J = 9.6$  Hz, 1H), 3.10-2.90 (m, 1H), 2.25-2.15 (m, 1H), 1.59 (s, 9H), 1.56-1.51 (m, 1H), 1.46 (s, 9H), 1.16 (t,  $J = 7.2$  Hz, 3H), 0.98 (s, 9H) ppm; **<sup>13</sup>C NMR** (100 MHz, CDCl<sub>3</sub>)  $\delta$  175.3, 169.9, 165.6, 154.2, 148.4 (d,  $J = 249.6$  Hz), 146.9, 127.7 (d,  $J = 9.2$  Hz), 127.5, 125.9 (d,  $J = 6.8$  Hz), 123.2, 123.2, 117.7 (d,  $J = 20.0$  Hz), 85.7, 82.7, 82.5, 70.6, 65.3, 61.0, 53.5, 36.8, 33.1, 28.1, 27.6, 27.1, 14.0 ppm; **<sup>19</sup>F NMR** (377 MHz, CDCl<sub>3</sub>)  $\delta$  -120.4 ppm; **HRMS (ESI)**  $m/z$  calcd for C<sub>30</sub>H<sub>41</sub>FN<sub>2</sub>O<sub>10</sub> [M+Na]<sup>+</sup> 631.2637, found 631.2628.

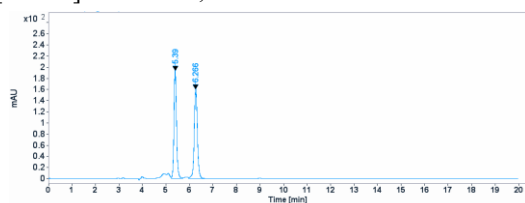

Signal: DAD1 C, Sig=210.4 Ref=off

| RT [min] | Width [min] | Area [mAU·S] | Height [mAU] | Area%   |
|----------|-------------|--------------|--------------|---------|
| 5.390    | 0.117       | 1489.103     | 193.250      | 49.7147 |
| 6.268    | 0.142       | 1495.965     | 159.940      | 50.2853 |
| Sum      |             | 2985.068     |              |         |

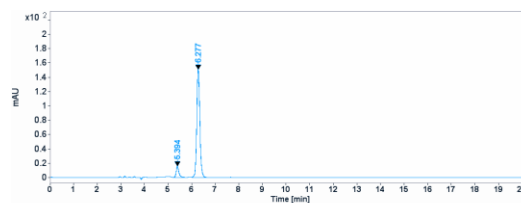

Signal: DAD1 C, Sig=210.4 Ref=off

| RT [min] | Width [min] | Area [mAU·S] | Height [mAU] | Area%   |
|----------|-------------|--------------|--------------|---------|
| 5.394    | 0.118       | 122.962      | 15.520       | 8.1928  |
| 6.277    | 0.143       | 1377.886     | 150.778      | 91.8072 |
| Sum      |             | 1500.848     |              |         |

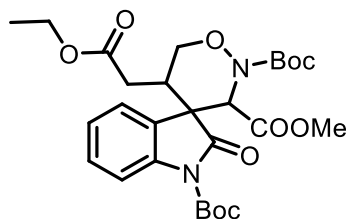

**4l**, yellow oil, 51 mg, 46% yield, >20:1 dr, 87% ee (Chiralcel IA column, i-PrOH/n-hexane = 20/80, 1.0 mL/min,  $\lambda = 210$  nm,  $t_{\text{major}} = 5.77$  min,  $t_{\text{minor}} = 5.28$  min);  $[\alpha]_{\text{D}}^{25} = 1.6$  (c = 1.0, CHCl<sub>3</sub>). **<sup>1</sup>H NMR** (400 MHz, CDCl<sub>3</sub>)  $\delta$  7.89 (d,  $J = 8.4$  Hz, 1H), 7.55 (d,  $J = 7.6$  Hz, 1H), 7.34 (t,  $J = 8.0$  Hz, 1H), 7.15 (t,  $J = 7.6$  Hz, 1H), 5.16 (s, 1H), 4.72 (t,  $J = 8.8$  Hz, 1H), 4.11-3.96 (m, 2H), 3.66 (t,  $J = 10.0$  Hz, 1H), 3.18 (s, 3H), 3.06-2.92 (m, 1H), 2.19-2.08 (m, 1H), 1.68-1.62 (m, 10H), 1.49 (s, 9H), 1.19 (d,  $J = 7.2$  Hz, 3H) ppm; **<sup>13</sup>C NMR** (100 MHz, CDCl<sub>3</sub>)  $\delta$  175.9, 170.0, 167.6, 154.1, 148.6, 140.7, 129.5, 126.7, 125.0, 124.2, 115.0, 85.1, 82.8, 70.4, 65.5, 61.0, 53.2, 51.8, 36.6, 33.3, 28.2, 28.1, 14.0 ppm; **HRMS (ESI)**  $m/z$  calcd for C<sub>27</sub>H<sub>36</sub>N<sub>2</sub>O<sub>10</sub> [M+Na]<sup>+</sup> 571.2262, found 571.2268.

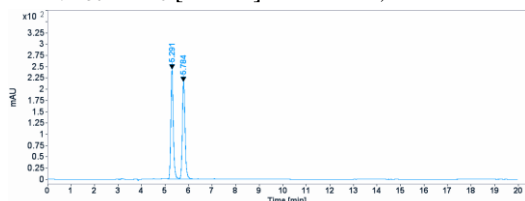

Signal: DAD1 C, Sig=210.4 Ref=off

| RT [min] | Width [min] | Area [mAU·S] | Height [mAU] | Area%   |
|----------|-------------|--------------|--------------|---------|
| 5.281    | 0.111       | 1798.169     | 243.477      | 50.4843 |
| 5.784    | 0.124       | 1734.246     | 215.798      | 49.5157 |
| Sum      |             | 3502.4146    |              |         |

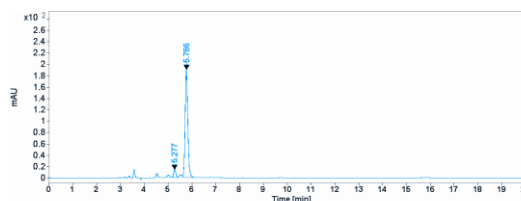

Signal: DAD1 C, Sig=210.4 Ref=off

| RT [min] | Width [min] | Area [mAU·S] | Height [mAU] | Area%   |
|----------|-------------|--------------|--------------|---------|
| 5.277    | 0.111       | 101.663      | 13.985       | 6.3148  |
| 5.766    | 0.123       | 1508.236     | 190.217      | 93.6852 |
| Sum      |             | 1609.900     |              |         |

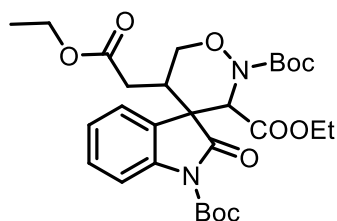

**4m**, yellow oil, 65 mg, 58% yield, >20:1 dr, 94% ee (Chiralcel IA column, i-PrOH/n-hexane = 20/80, 1.0 mL/min,  $\lambda = 210$  nm,  $t_{\text{major}} = 5.68$  min,  $t_{\text{minor}} = 4.87$  min);  $[\alpha]_{\text{D}}^{25} = 2.1$  ( $c = 1.0$ ,  $\text{CHCl}_3$ ).  **$^1\text{H}$  NMR** (400 MHz,  $\text{CDCl}_3$ )  $\delta$  7.87 (d,  $J = 8.0$  Hz, 1H), 7.56 (d,  $J = 7.6$  Hz, 1H), 7.33 (t,  $J = 8.0$  Hz, 1H), 7.14 (t,  $J = 7.6$  Hz, 1H), 5.12 (s, 1H), 4.72 (t,  $J = 8.8$  Hz, 1H), 4.08-3.94 (m, 2H), 3.73-3.50 (m, 3H), 3.08-2.99 (m, 1H), 2.19-2.08 (m, 1H), 1.67-1.60 (m, 10H), 1.48 (s, 9H), 1.17 (t,  $J = 7.2$  Hz, 3H), 0.72 (t,  $J = 7.2$  Hz, 3H) ppm;  **$^{13}\text{C}$  NMR** (100 MHz,  $\text{CDCl}_3$ )  $\delta$  175.9, 170.0, 166.9, 154.1, 148.6, 140.8, 129.5, 126.9, 125.0, 124.1, 114.9, 85.1, 82.6, 70.4, 65.2, 61.2, 61.0, 53.1, 36.6, 33.3, 28.2, 28.1, 28.0, 28.0, 14.0, 13.2 ppm; **HRMS (ESI)**  $m/z$  calcd for  $\text{C}_{28}\text{H}_{38}\text{N}_2\text{O}_{10}$   $[\text{M}+\text{Na}]^+$  585.2419, found 585.2429.

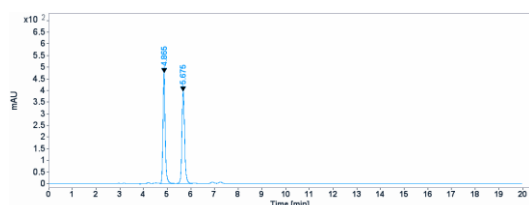

Signal: DAD1 C, Sig=210.4 Ref=off

| RT [min] | Width [min] | Area [mAU·S] | Height [mAU] | Area%   |
|----------|-------------|--------------|--------------|---------|
| 4.865    | 0.099       | 3143.327     | 476.182      | 49.7765 |
| 5.675    | 0.121       | 3171.557     | 395.933      | 50.2235 |
| Sum      |             | 6314.884     |              |         |

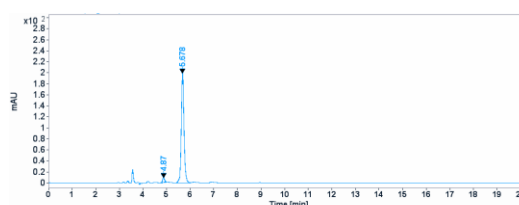

Signal: DAD1 C, Sig=210.4 Ref=off

| RT [min] | Width [min] | Area [mAU·S] | Height [mAU] | Area%   |
|----------|-------------|--------------|--------------|---------|
| 4.870    | 0.099       | 48.970       | 8.276        | 2.9809  |
| 5.678    | 0.122       | 1583.804     | 198.608      | 97.0191 |
| Sum      |             | 1642.7742    |              |         |

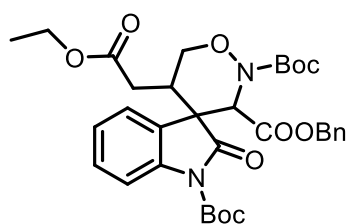

**4n**, yellow oil, 85 mg, 68% yield, >20:1 dr, 87% ee (Chiralcel IA column, i-PrOH/n-hexane = 20/80, 1.0 mL/min,  $\lambda = 210$  nm,  $t_{\text{major}} = 7.25$  min,  $t_{\text{minor}} = 5.50$  min);  $[\alpha]_{\text{D}}^{25} = 3.9$  ( $c = 1.0$ ,  $\text{CHCl}_3$ ).  **$^1\text{H}$  NMR** (400 MHz,  $\text{CDCl}_3$ )  $\delta$  7.75 (d,  $J = 8.4$  Hz, 1H), 7.55 (d,  $J = 7.6$  Hz, 1H), 7.31-7.17 (m, 4H), 7.11 (t,  $J = 7.6$  Hz, 1H), 6.97-6.85 (m, 2H), 5.20 (s, 1H), 4.79-4.64 (m, 2H), 4.40 (d,  $J = 12.0$  Hz, 1H), 4.09-3.94 (m, 2H), 3.63 (t,  $J = 10.0$  Hz, 1H), 3.07-2.91 (m, 1H), 2.17-2.04 (m, 1H), 1.61-1.55 (m, 10H), 1.48 (s, 9H), 1.17 (t,  $J = 7.2$  Hz, 3H) ppm;  **$^{13}\text{C}$  NMR** (100 MHz,  $\text{CDCl}_3$ )  $\delta$  175.7, 170.0, 167.0, 154.1, 148.4, 140.6, 134.2, 129.5, 128.5, 128.4, 128.3, 126.6, 125.0, 123.9, 115.1, 84.9, 82.7, 70.4, 67.2, 65.1, 61.0, 53.03, 36.7, 33.2, 28.2, 28.0, 14.0 ppm; **HRMS (ESI)**  $m/z$  calcd for  $\text{C}_{33}\text{H}_{40}\text{N}_2\text{O}_{10}$   $[\text{M}+\text{Na}]^+$  647.2575, found 647.2578.



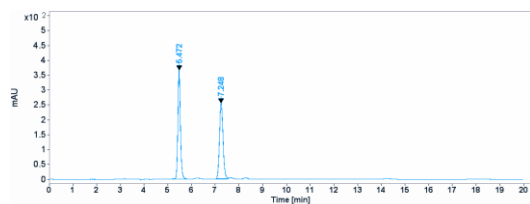

Signal: DAD1 C, Sig=210.4 Ref=off

| RT [min] | Width [min] | Area [mAU·S] | Height [mAU] | Area%   |
|----------|-------------|--------------|--------------|---------|
| 6.472    | 0.115       | 2796.228     | 366.829      | 51.2058 |
| 7.248    | 0.162       | 2683.582     | 254.839      | 48.7942 |
| Sum      |             | 5458.8098    |              |         |

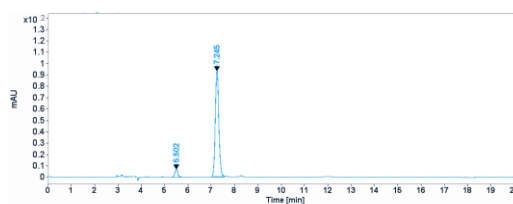

Signal: DAD1 C, Sig=210.4 Ref=off

| RT [min] | Width [min] | Area [mAU·S] | Height [mAU] | Area%   |
|----------|-------------|--------------|--------------|---------|
| 5.602    | 0.136       | 80.625       | 6.945        | 5.8832  |
| 7.245    | 0.161       | 969.843      | 93.174       | 94.1168 |
| Sum      |             | 1030.4673    |              |         |

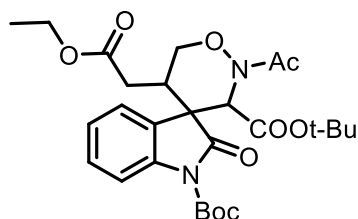

**4o**, yellow oil, 97 mg, 92% yield, >20:1 dr, 91% ee (Chiralcel IA column, i-PrOH/n-hexane = 20/80, 1.0 mL/min,  $\lambda = 210$  nm,  $t_{\text{major}} = 6.03$  min,  $t_{\text{minor}} = 6.78$  min);  $[\alpha]_{\text{D}}^{25} = 2.2$  (c = 1.0, CHCl<sub>3</sub>). **<sup>1</sup>H NMR** (400 MHz, CDCl<sub>3</sub>)  $\delta$  7.91 (d,  $J = 8.0$  Hz, 1H), 7.54 (dd,  $J = 7.6, 1.2$  Hz, 1H), 7.35 (td,  $J = 8.0, 1.2$  Hz, 1H), 7.15 (td,  $J = 7.6, 1.2$  Hz, 1H), 5.31 (s, 1H), 4.67 (dd,  $J = 10.4, 8.0$  Hz, 1H), 4.10-3.91 (m, 2H), 3.70 (t,  $J = 10.0$  Hz, 1H), 3.01-2.84 (m, 1H), 2.24 (s, 3H), 2.17 (dd,  $J = 16.4, 3.6$  Hz, 1H), 1.65-1.56 (m, 10H), 1.15 (t,  $J = 7.2$  Hz, 3H), 0.88 (s, 9H) ppm; **<sup>13</sup>C NMR** (100 MHz, CDCl<sub>3</sub>)  $\delta$  175.5, 170.1, 164.5, 148.6, 141.0, 129.6, 126.8, 125.1, 124.3, 115.0, 85.1, 82.8, 71.6, 63.0, 61.0, 52.6, 36.3, 33.2, 28.0, 27.1, 26.9, 20.3, 14.0 ppm. **HRMS (ESI)**  $m/z$  calcd for C<sub>27</sub>H<sub>34</sub>N<sub>2</sub>O<sub>9</sub> [M+Na]<sup>+</sup> 555.2313, found 555.2311.

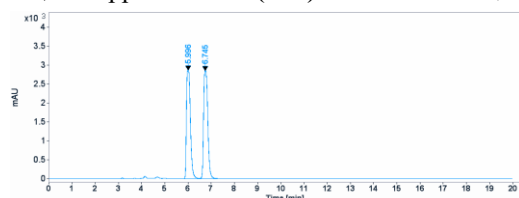

Signal: DAD1 C, Sig=210.4 Ref=off

| RT [min] | Width [min] | Area [mAU·S] | Height [mAU] | Area%   |
|----------|-------------|--------------|--------------|---------|
| 5.998    | 0.198       | 33774.172    | 2858.120     | 48.6784 |
| 6.745    | 0.198       | 35806.727    | 2845.979     | 51.3206 |
| Sum      |             | 69380.8994   |              |         |

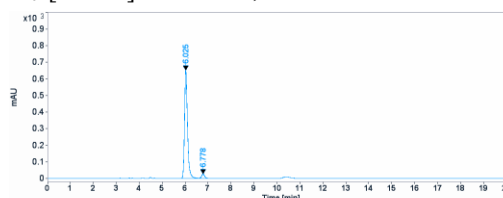

Signal: DAD1 C, Sig=210.4 Ref=off

| RT [min] | Width [min] | Area [mAU·S] | Height [mAU] | Area%   |
|----------|-------------|--------------|--------------|---------|
| 6.025    | 0.137       | 5982.545     | 651.852      | 95.7484 |
| 6.778    | 0.154       | 260.317      | 25.754       | 4.2516  |
| Sum      |             | 6122.8625    |              |         |

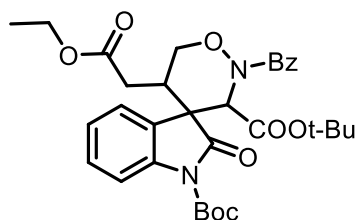

**4p**, yellow oil, 94 mg, 82% yield, >20:1 dr, 66% ee (Chiralcel IA column, i-PrOH/n-hexane = 20/80, 1.0 mL/min,  $\lambda = 210$  nm,  $t_{\text{major}} = 8.72$  min,  $t_{\text{minor}} = 6.26$  min);  $[\alpha]_{\text{D}}^{25} = 3.2$  (c = 1.0, CHCl<sub>3</sub>). **<sup>1</sup>H NMR** (400 MHz, CDCl<sub>3</sub>)  $\delta$  7.94 (d,  $J = 8.0$  Hz, 1H), 7.90-7.69 (m, 2H), 7.60 (dd,  $J = 7.6, 1.2$  Hz, 1H), 7.50-7.33 (m, 4H), 7.16 (td,  $J = 7.6, 1.2$  Hz, 1H), 5.59 (br, 1H), 4.55 (br, 1H), 4.09-3.91 (m, 2H), 3.63 (t,  $J = 10.0$  Hz,

1H), 3.08-2.93 (m, 1H), 2.20 (dd,  $J = 16.4, 3.6$  Hz, 1H), 1.68-1.59 (m, 10H), 1.14 (t,  $J = 7.2$  Hz, 3H), 0.93 (s, 9H) ppm;  $^{13}\text{C}$  NMR (100 MHz,  $\text{CDCl}_3$ )  $\delta$  175.5, 170.0, 169.9, 164.6, 148.7, 141.0, 133.1, 131.2, 129.6, 128.4, 128.0, 126.9, 125.1, 124.3, 115.0, 85.1, 82.8, 71.6, 63.6, 61.0, 52.8, 36.3, 33.2, 28.0, 27.0, 14.0 ppm. HRMS (ESI)  $m/z$  calcd for  $\text{C}_{27}\text{H}_{34}\text{N}_2\text{O}_9$   $[\text{M}+\text{Na}]^+$  617.2470, found 617.2476.

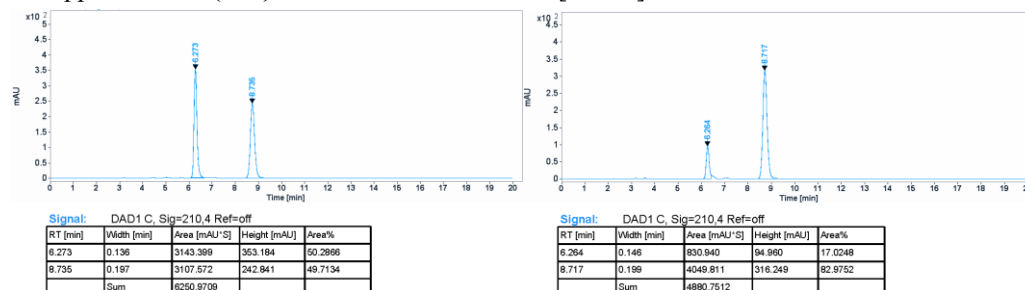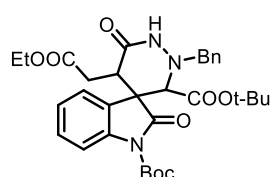

**7a**, white solid, m.p. = 90.1-91.1 °C, 88 mg, 74% yield, >20:1 dr, 91% ee (Chiralcel IA column,  $i$ -PrOH/n-hexane = 20/80, 1.0 mL/min,  $\lambda = 220$  nm,  $t_{\text{major}} = 6.40$  min,  $t_{\text{minor}} = 9.40$  min);  $[\alpha]_{\text{D}}^{25} = -14.6$  ( $c = 1.0$ ,  $\text{CH}_2\text{Cl}_2$ ).  $^1\text{H}$  NMR (400 MHz,  $\text{CDCl}_3$ )  $\delta$  7.86 (d,  $J = 8.0$  Hz, 1H), 7.58 (s, 1H), 7.47 (d,  $J = 7.2$  Hz, 2H), 7.33 (m, 4H), 7.20 (d,  $J = 7.4$  Hz, 1H), 7.09 (t,  $J = 7.4$  Hz, 1H), 4.57 – 4.44 (m, 2H), 4.37 (s, 1H), 4.12 (q,  $J = 7.0$  Hz, 2H), 3.77 (d,  $J = 10.4$  Hz, 1H), 2.10 (m, 1H), 1.86 (d,  $J = 16.6$  Hz, 1H), 1.65 (s, 9H), 1.22 (t,  $J = 7.0$  Hz, 3H), 0.87 (s, 9H).  $^{13}\text{C}$  NMR (101 MHz,  $\text{CDCl}_3$ )  $\delta$  174.77, 172.33, 170.73, 166.98, 148.58, 140.16, 136.06, 129.66, 128.86, 128.75, 128.00, 125.31, 124.94, 124.53, 114.92, 85.15, 82.16, 69.69, 64.80, 60.88, 58.42, 42.84, 29.11, 27.98, 26.93, 14.01. HRMS (ESI)  $m/z$  calcd for  $\text{C}_{32}\text{H}_{39}\text{N}_3\text{O}_8$   $[\text{M}+\text{H}]^+$  594.2810, found 594.2816.

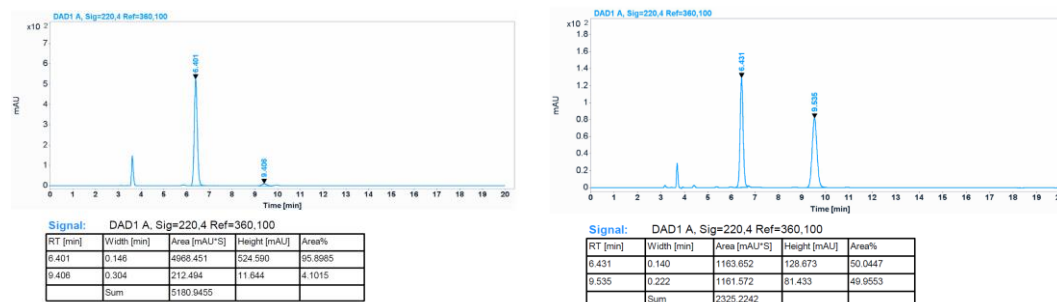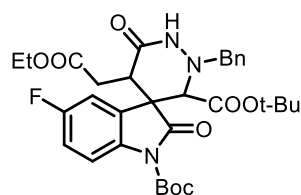

**7b**, white solid, m.p. = 86.7-87.6 °C, 73 mg, 60% yield, >20:1 dr, 91% ee (Chiralcel IA column,  $i$ -PrOH/n-hexane = 20/80, 1.0 mL/min,  $\lambda = 220$  nm,  $t_{\text{major}} = 5.40$  min,  $t_{\text{minor}} = 7.30$  min);  $[\alpha]_{\text{D}}^{25} = 13.2$  ( $c = 1.0$ ,  $\text{CH}_2\text{Cl}_2$ ).  $^1\text{H}$  NMR (400 MHz,  $\text{CDCl}_3$ )  $\delta$  7.89 (dd,  $J = 8.8, 4.2$  Hz, 1H), 7.47 (d,  $J = 7.4$  Hz, 2H), 7.42 –

7.31 (m, 3H), 7.07 (t,  $J = 8.8$  Hz, 1H), 6.97 (d,  $J = 7.8$  Hz, 1H), 4.49 (d,  $J = 4.6$  Hz, 2H), 4.38 (s, 1H), 4.14 (q,  $J = 7.0$  Hz, 2H), 3.78 (d,  $J = 10.4$  Hz, 1H), 2.15 (dd,  $J = 16.2, 10.8$  Hz, 1H), 1.88 (d,  $J = 16.2$  Hz, 1H), 1.65 (s, 9H), 1.24 (t,  $J = 7.0$  Hz, 3H), 0.95 (s, 9H).  $^{13}\text{C}$  NMR (101 MHz,  $\text{CDCl}_3$ )  $\delta$  174.31, 172.01, 170.57, 166.75, 160.12 ( $J = 244.8$ ), 148.58, 136.24, 135.92, 128.91, 128.84, 128.14, 126.77 ( $J = 7.8$ ), 116.28 ( $J = 22.3$ ), 116.26 ( $J = 7.8$ ), 112.54 ( $J = 25.3$ ), 85.42, 82.45, 69.68, 64.84, 61.02, 58.53, 42.89, 29.12, 28.01, 27.04, 14.04.  $^{19}\text{F}$  NMR (377 MHz,  $\text{CDCl}_3$ )  $\delta$  -115.7 ppm; HRMS (ESI)  $m/z$  calcd for  $\text{C}_{32}\text{H}_{38}\text{F}_1\text{N}_3\text{O}_8$   $[\text{M}+\text{H}]^+$  612.2716, found 612.2719.

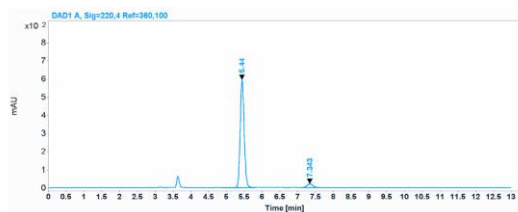

Signal: DAD1 A, Sig=220.4 Ref=360,100

| RT [min] | Width [min] | Area [mAU*s] | Height [mAU] | Area%   |
|----------|-------------|--------------|--------------|---------|
| 4.440    | 0.121       | 4667.597     | 596.142      | 95.7300 |
| 7.343    | 0.162       | 208.196      | 19.857       | 4.2700  |
| Sum      |             | 4875.7928    |              |         |

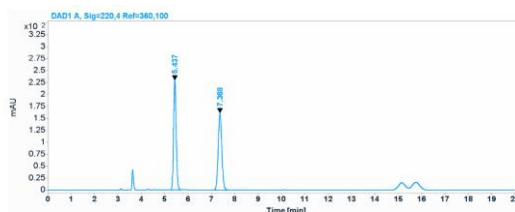

Signal: DAD1 A, Sig=220.4 Ref=360,100

| RT [min] | Width [min] | Area [mAU*s] | Height [mAU] | Area%   |
|----------|-------------|--------------|--------------|---------|
| 5.437    | 0.120       | 1775.621     | 229.402      | 50.8962 |
| 7.368    | 0.166       | 1712.884     | 160.797      | 49.1038 |
| Sum      |             | 3488.5055    |              |         |

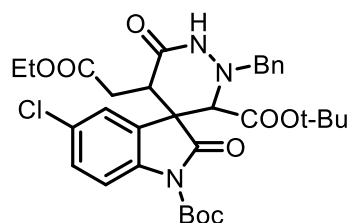

**7c**, white solid, m.p. = 92.3-94.8°C, 80 mg, 64% yield, >20:1 dr, 91% ee (Chiralcel IA column, *i*-PrOH/*n*-hexane = 20/80, 1.0 mL/min,  $\lambda = 220$  nm,  $t_{\text{major}} = 4.70$  min,  $t_{\text{minor}} = 5.48$  min);  $[\alpha]_{\text{D}}^{25} = 11.0$  ( $c = 1.0$ ,  $\text{CH}_2\text{Cl}_2$ ).  $^1\text{H}$  NMR (400 MHz,  $\text{CDCl}_3$ )  $\delta$  7.86 (d,  $J = 8.8$  Hz, 1H), 7.47 (d,  $J = 7.6$  Hz, 2H), 7.43 – 7.31 (m, 5H), 7.19 (s, 1H), 4.49 (s, 2H), 4.37 (s, 1H), 4.15 (q,  $J = 7.0$  Hz, 2H), 3.78 (d,  $J = 10.6$  Hz, 1H), 2.17 (dd,  $J = 16.0, 10.6$  Hz, 1H), 1.88 (d,  $J = 16.2$  Hz, 1H), 1.65 (s, 9H), 1.25 (t,  $J = 7.2$  Hz, 3H), 0.96 (s, 9H).  $^{13}\text{C}$  NMR (101 MHz,  $\text{CDCl}_3$ )  $\delta$  174.07, 171.89, 170.56, 166.71, 148.46, 138.77, 135.92, 130.99, 129.78, 128.90, 128.83, 128.14, 126.83, 124.77, 116.17, 85.60, 82.53, 69.77, 64.82, 61.04, 58.39, 42.88, 29.12, 28.00, 27.04, 14.05. HRMS (ESI)  $m/z$  calcd for  $\text{C}_{32}\text{H}_{38}\text{Cl}_1\text{N}_3\text{O}_8$   $[\text{M}+\text{H}]^+$  628.2420, found 628.2421.

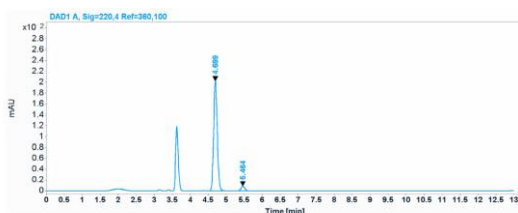

Signal: DAD1 A, Sig=220.4 Ref=360,100

| RT [min] | Width [min] | Area [mAU*s] | Height [mAU] | Area%   |
|----------|-------------|--------------|--------------|---------|
| 4.699    | 0.109       | 1404.854     | 202.486      | 95.6495 |
| 5.464    | 0.120       | 83.898       | 8.316        | 4.3505  |
| Sum      |             | 1488.7521    |              |         |

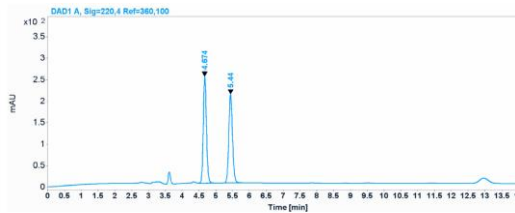

Signal: DAD1 A, Sig=220.4 Ref=360,100

| RT [min] | Width [min] | Area [mAU*s] | Height [mAU] | Area%   |
|----------|-------------|--------------|--------------|---------|
| 4.674    | 0.102       | 1622.833     | 248.413      | 50.8394 |
| 5.440    | 0.119       | 1566.048     | 205.454      | 49.1606 |
| Sum      |             | 3188.881     |              |         |

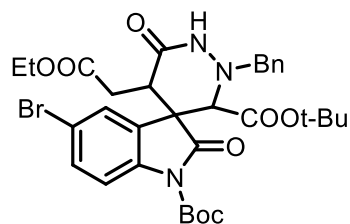

**7d**, white solid, m.p. =96.5-98.3°C, 81 mg, 61% yield, >20:1 dr, 91% ee (Chiralcel IA column, i-PrOH/n-hexane = 20/80, 1.0 mL/min,  $\lambda$  = 220 nm,  $t_{\text{major}}$  = 4.63 min,  $t_{\text{minor}}$  = 5.37 min);  $[\alpha]_{\text{D}}^{25}$  = 8.6 (c = 1.0, CH<sub>2</sub>Cl<sub>2</sub>). <sup>1</sup>H NMR (400 MHz, CDCl<sub>3</sub>)  $\delta$  7.80 (d,  $J$  = 8.6 Hz, 1H), 7.51 – 7.46 (m, 4H), 7.38 – 7.28 (m, 4H), 4.53 – 4.45 (m, 2H), 4.36 (s, 1H), 4.14 (q,  $J$  = 7.0 Hz, 2H), 3.78 (d,  $J$  = 10.4 Hz, 1H), 2.18 (dd,  $J$  = 16.2, 10.8 Hz, 1H), 1.87 (d,  $J$  = 16.2 Hz, 1H), 1.65 (s, 9H), 1.25 (t,  $J$  = 7.2 Hz, 3H), 0.95 (s, 9H). <sup>13</sup>C NMR (101 MHz, CDCl<sub>3</sub>)  $\delta$  173.94, 171.87, 170.55, 166.72, 148.43, 139.29, 135.93, 132.74, 128.91, 128.83, 128.13, 127.51, 127.20, 118.42, 116.54, 85.61, 82.55, 69.75, 64.79, 61.04, 58.32, 42.89, 29.13, 28.00, 27.04, 14.05. **HRMS (ESI)**  $m/z$  calcd for C<sub>32</sub>H<sub>38</sub>BrN<sub>3</sub>O<sub>8</sub> [M+H]<sup>+</sup> 672.1915, found 672.1917.

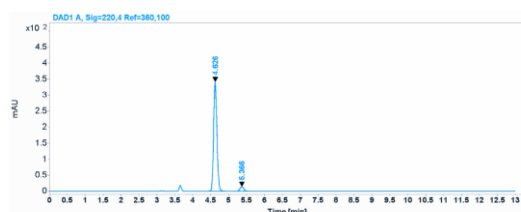

Signal: DAD1 A, Sig=220.4 Ref=360,100

| RT [min] | Width [min] | Area [mAU*s] | Height [mAU] | Area%   |
|----------|-------------|--------------|--------------|---------|
| 4.626    | 0.098       | 2179.064     | 341.485      | 95.5142 |
| 5.366    | 0.117       | 102.340      | 13.726       | 4.4858  |
| Sum      |             | 2281.4041    |              |         |

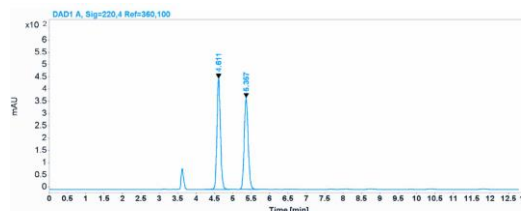

Signal: DAD1 A, Sig=220.4 Ref=360,100

| RT [min] | Width [min] | Area [mAU*s] | Height [mAU] | Area%   |
|----------|-------------|--------------|--------------|---------|
| 4.611    | 0.104       | 3016.213     | 452.740      | 51.5448 |
| 5.357    | 0.119       | 2935.417     | 372.425      | 48.4552 |
| Sum      |             | 5951.6294    |              |         |

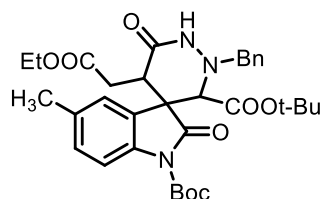

**7e**, white solid, m.p. =86.1-88.7°C, 109 mg, 90% yield, >20:1 dr, 83% ee (Chiralcel IA column, i-PrOH/n-hexane = 20/80, 1.0 mL/min,  $\lambda$  = 220 nm,  $t_{\text{major}}$  = 4.16 min,  $t_{\text{minor}}$  = 5.29 min);  $[\alpha]_{\text{D}}^{25}$  = 6.6 (c = 1.0, CH<sub>2</sub>Cl<sub>2</sub>). <sup>1</sup>H NMR (400 MHz, CDCl<sub>3</sub>)  $\delta$  7.75 (d,  $J$  = 8.4 Hz, 1H), 7.48 (d,  $J$  = 7.4 Hz, 2H), 7.42 – 7.31 (m, 4H), 7.15 (d,  $J$  = 8.4 Hz, 1H), 6.99 (s, 1H), 4.50 (s, 2H), 4.38 (s, 1H), 4.14 (q,  $J$  = 6.8 Hz, 2H), 3.77 (d,  $J$  = 10.6 Hz, 1H), 2.26 (s, 3H), 2.15 (dd,  $J$  = 16.4, 10.8 Hz, 1H), 1.89 (d,  $J$  = 16.4 Hz, 1H), 1.66 (s, 9H), 1.24 (t,  $J$  = 7.0 Hz, 3H), 0.90 (s, 9H). <sup>13</sup>C NMR (101 MHz, CDCl<sub>3</sub>)  $\delta$  174.98, 172.33, 170.80, 167.05, 148.68, 137.82, 136.16, 135.12, 130.10, 128.90, 128.78, 128.04, 125.03, 124.95, 114.76, 84.99, 82.16, 69.88, 64.89, 60.91, 58.48, 42.93, 29.19, 28.04, 26.93, 21.02, 14.05. **HRMS (ESI)**  $m/z$  calcd for C<sub>33</sub>H<sub>41</sub>N<sub>3</sub>O<sub>8</sub> [M+H]<sup>+</sup> 608.2966, found 608.2976.

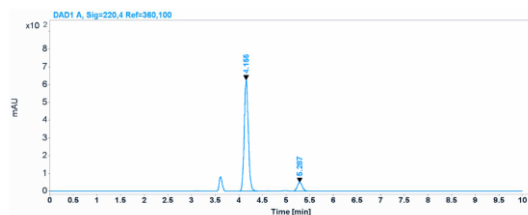

Signal: DAD1 A, Sig=220.4 Ref=360,100

| RT [min] | Width [min] | Area [mAU*s] | Height [mAU] | Area%   |
|----------|-------------|--------------|--------------|---------|
| 4.155    | 0.095       | 3829.010     | 626.974      | 91.2862 |
| 5.287    | 0.116       | 365.502      | 48.531       | 8.7138  |
| Sum      |             | 4194.5115    |              |         |

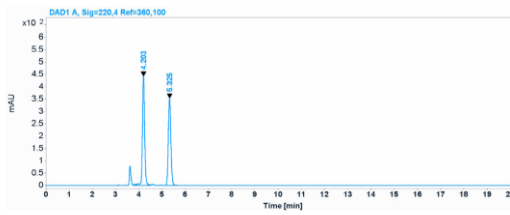

Signal: DAD1 A, Sig=220.4 Ref=360,100

| RT [min] | Width [min] | Area [mAU*s] | Height [mAU] | Area%   |
|----------|-------------|--------------|--------------|---------|
| 4.203    | 0.099       | 2924.772     | 441.350      | 52.1304 |
| 5.325    | 0.110       | 2685.725     | 352.420      | 47.8696 |
| Sum      |             | 5610.4976    |              |         |

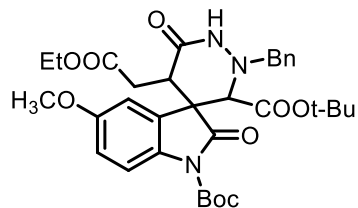

**7f**, white solid, m.p. =84.0-86.3°C, 92 mg, 74% yield, >20:1 dr, 90% ee (Chiralcel IA column, i-PrOH/n-hexane = 20/80, 1.0 mL/min,  $\lambda = 220$  nm,  $t_{\text{major}} = 4.50$  min,  $t_{\text{minor}} = 5.35$  min);  $[\alpha]_{\text{D}}^{25} = 6.6$  ( $c = 1.0$ ,  $\text{CH}_2\text{Cl}_2$ ).  $^1\text{H NMR}$  (400 MHz,  $\text{CDCl}_3$ )  $\delta$  7.79 (d,  $J = 9.0$  Hz, 1H), 7.48 (d,  $J = 7.2$  Hz, 2H), 7.42 – 7.31 (m, 4H), 6.88 (d,  $J = 9.0$  Hz, 1H), 6.76 (s, 1H), 4.51 (s, 2H), 4.39 (s, 1H), 4.14 (q,  $J = 7.0$  Hz, 2H), 3.78 (d,  $J = 10.6$  Hz, 1H), 3.72 (s, 3H), 2.16 (dd,  $J = 16.4, 11.0$  Hz, 1H), 1.89 (d,  $J = 16.6$  Hz, 1H), 1.66 (s, 9H), 1.24 (t,  $J = 7.2$  Hz, 3H), 0.94 (s, 9H).  $^{13}\text{C NMR}$  (101 MHz,  $\text{CDCl}_3$ )  $\delta$  174.88, 172.35, 170.75, 167.00, 157.37, 148.70, 136.11, 133.38, 128.92, 128.80, 128.06, 126.13, 115.92, 115.03, 110.46, 84.96, 82.21, 69.80, 64.84, 60.93, 58.78, 55.68, 42.95, 29.16, 28.05, 27.02, 14.05. **HRMS (ESI)**  $m/z$  calcd for  $\text{C}_{33}\text{H}_{41}\text{N}_3\text{O}_9$   $[\text{M}+\text{H}]^+$  624.2916, found 624.2922.

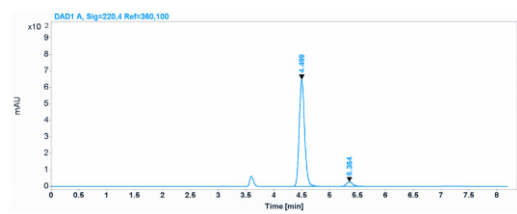

Signal: DAD1 A, Sig=220.4 Ref=360,100

| RT [min] | Width [min] | Area [mAU*s] | Height [mAU] | Area%   |
|----------|-------------|--------------|--------------|---------|
| 4.499    | 0.105       | 4380.369     | 648.443      | 95.0417 |
| 5.354    | 0.130       | 228.992      | 26.837       | 4.9583  |
| Sum      |             | 4618.3612    |              |         |

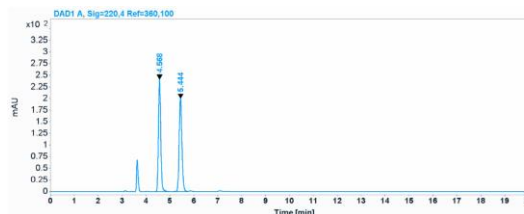

Signal: DAD1 A, Sig=220.4 Ref=360,100

| RT [min] | Width [min] | Area [mAU*s] | Height [mAU] | Area%   |
|----------|-------------|--------------|--------------|---------|
| 4.568    | 0.104       | 1606.316     | 240.428      | 50.2041 |
| 5.444    | 0.123       | 1583.252     | 199.582      | 49.7959 |
| Sum      |             | 3199.5675    |              |         |

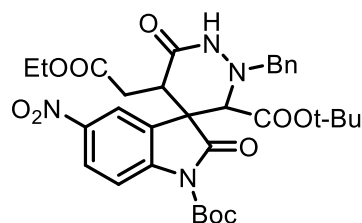

**7g**, white solid, m.p. =105.1-105.7°C, 62 mg, 49% yield, >20:1 dr, 55% ee (Chiralcel IA column, i-PrOH/n-hexane = 20/80, 1.0 mL/min,  $\lambda = 220$  nm,  $t_{\text{major}} = 7.21$  min,  $t_{\text{minor}} = 5.99$  min);  $[\alpha]_{\text{D}}^{25} = 3.4$  ( $c = 1.0$ ,  $\text{CH}_2\text{Cl}_2$ ).  $^1\text{H NMR}$  (400 MHz,  $\text{CDCl}_3$ )  $\delta$  8.33 (dd,  $J = 9.0, 2.4$  Hz, 1H), 8.09 (m, 2H), 7.48 (d,  $J = 6.6$  Hz, 2H), 7.44 – 7.31 (m, 3H), 4.55 – 4.48 (m, 2H), 4.41 (s, 1H), 4.15 (q,  $J = 7.2$  Hz, 2H), 3.83 (dd,  $J = 10.6, 3.2$  Hz, 1H), 2.20 – 2.04 (m, 1H), 1.88 (dd,  $J = 16.2, 3.2$  Hz, 1H), 1.68 (s, 9H), 1.25 (t,  $J = 7.2$

Hz, 3H), 0.94 (s, 9H).  $^{13}\text{C}$  NMR (101 MHz,  $\text{CDCl}_3$ )  $\delta$  173.61, 171.44, 170.26, 166.44, 148.16, 145.41, 144.91, 135.67, 128.92, 128.29, 126.45, 125.97, 120.05, 115.14, 86.56, 82.80, 69.78, 64.90, 61.18, 58.17, 42.98, 29.04, 27.96, 27.09, 14.02. **HRMS (ESI)**  $m/z$  calcd for  $\text{C}_{32}\text{H}_{38}\text{N}_4\text{O}_{10}$   $[\text{M}+\text{H}]^+$  639.2661, found 639.2670.

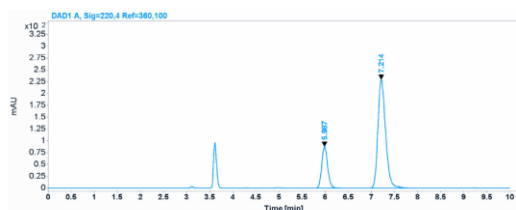

Signal: DAD1 A, Sig=220.4 Ref=360.100

| RT [min] | Width [min] | Area [mAU*s] | Height [mAU] | Area%   |
|----------|-------------|--------------|--------------|---------|
| 5.967    | 0.136       | 768.834      | 88.033       | 22.4395 |
| 7.214    | 0.179       | 2657.423     | 229.732      | 77.5605 |
| Sum      |             | 3426.2574    |              |         |

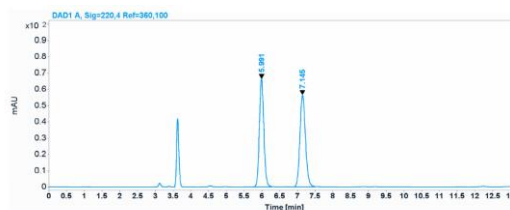

Signal: DAD1 A, Sig=220.4 Ref=360.100

| RT [min] | Width [min] | Area [mAU*s] | Height [mAU] | Area%   |
|----------|-------------|--------------|--------------|---------|
| 5.991    | 0.133       | 574.813      | 88.367       | 48.5220 |
| 7.145    | 0.168       | 609.810      | 56.283       | 51.4771 |
| Sum      |             | 1184.6221    |              |         |

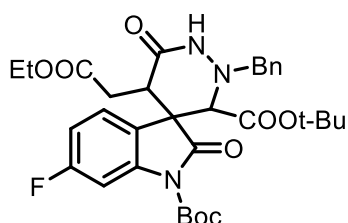

**7h**, white solid, m.p. = 180.5-182.1°C, 73 mg, 60% yield, >20:1 dr, 91% ee (Chiralcel IA column,  $i$ -PrOH/ $n$ -hexane = 20/80, 1.0 mL/min,  $\lambda$  = 220 nm,  $t_{\text{major}}$  = 4.64 min,  $t_{\text{minor}}$  = 6.08 min);  $[\alpha]_{\text{D}}^{25}$  = -15.2 ( $c$  = 1.0,  $\text{CH}_2\text{Cl}_2$ ).  $^1\text{H}$  NMR (400 MHz,  $\text{CDCl}_3$ )  $\delta$  7.69 (d,  $J$  = 10.0 Hz, 1H), 7.59 (s, 1H), 7.46 (d,  $J$  = 7.4 Hz, 2H), 7.42 – 7.27 (m, 3H), 7.20 – 7.13 (m, 1H), 6.81 (t,  $J$  = 8.6 Hz, 1H), 4.54 – 4.45 (m, 2H), 4.35 (s, 1H), 4.13 (q,  $J$  = 7.0 Hz, 2H), 3.77 (d,  $J$  = 10.4 Hz, 1H), 2.14 (dd,  $J$  = 16.2, 10.6 Hz, 1H), 1.85 (d,  $J$  = 16.2 Hz, 1H), 1.65 (s, 9H), 1.24 (t,  $J$  = 7.0 Hz, 3H), 0.94 (s, 9H).  $^{13}\text{C}$  NMR (101 MHz,  $\text{CDCl}_3$ )  $\delta$  174.56, 172.21, 170.62, 166.90, 163.39 ( $J$  = 246.1), 148.35, 141.50 ( $J$  = 12.4), 135.96, 128.87, 128.82, 128.10, 125.88 ( $J$  = 9.5), 120.45, 111.81 ( $J$  = 22.2), 103.93 ( $J$  = 29.8), 85.71, 82.34, 69.76, 64.77, 60.98, 58.15, 42.91, 29.11, 27.98, 27.07, 14.04.  $^{19}\text{F}$  NMR (377 MHz,  $\text{CDCl}_3$ )  $\delta$  -108.6 ppm; **HRMS (ESI)**  $m/z$  calcd for  $\text{C}_{32}\text{H}_{38}\text{F}_1\text{N}_3\text{O}_8$   $[\text{M}+\text{H}]^+$  612.2716, found 612.2727.

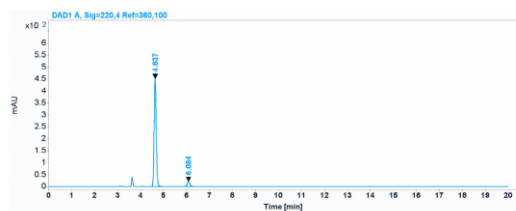

Signal: DAD1 A, Sig=220.4 Ref=360.100

| RT [min] | Width [min] | Area [mAU*s] | Height [mAU] | Area%   |
|----------|-------------|--------------|--------------|---------|
| 4.637    | 0.097       | 2839.760     | 452.846      | 93.6267 |
| 6.084    | 0.136       | 186.840      | 21.001       | 6.1733  |
| Sum      |             | 3026.6002    |              |         |

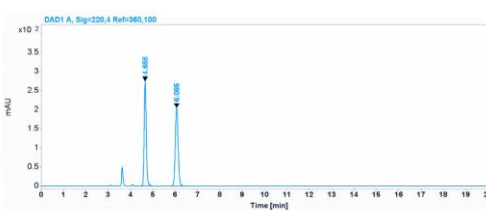

Signal: DAD1 A, Sig=220.4 Ref=360.100

| RT [min] | Width [min] | Area [mAU*s] | Height [mAU] | Area%   |
|----------|-------------|--------------|--------------|---------|
| 4.658    | 0.102       | 1796.304     | 274.474      | 50.1319 |
| 6.065    | 0.138       | 1786.852     | 204.711      | 49.8681 |
| Sum      |             | 3583.1564    |              |         |

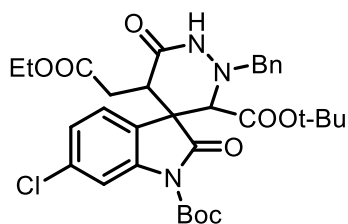

**7i**, white solid, m.p. =187.2-188.9°C, 65 mg, 52% yield, >20:1 dr, 50% ee (Chiralcel IA column, i-PrOH/n-hexane = 20/80, 1.0 mL/min,  $\lambda$  = 220 nm,  $t_{\text{major}}$  = 4.51 min,  $t_{\text{minor}}$  = 5.89 min);  $[\alpha]_{\text{D}}^{25}$  = -14.0 ( $c$  = 1.0,  $\text{CH}_2\text{Cl}_2$ ).  **$^1\text{H NMR}$**  (400 MHz,  $\text{CDCl}_3$ )  $\delta$  7.98 (s, 1H), 7.46 (d,  $J$  = 7.2 Hz, 2H), 7.38 – 7.33 (m, 4H), 7.13 (s, 2H), 4.52 – 4.40 (m, 2H), 4.36 (s, 1H), 4.14 (q,  $J$  = 7.2 Hz, 2H), 3.78 (dd,  $J$  = 10.6, 3.2 Hz, 1H), 2.14 (dd,  $J$  = 16.2, 10.6 Hz, 1H), 1.86 (dd,  $J$  = 16.2, 3.2 Hz, 1H), 1.66 (s, 9H), 1.25 (t,  $J$  = 7.2 Hz, 3H), 0.95 (s, 9H).  **$^{13}\text{C NMR}$**  (101 MHz,  $\text{CDCl}_3$ )  $\delta$  174.27, 172.08, 170.58, 166.79, 148.37, 141.20, 135.94, 135.79, 128.87, 128.84, 128.14, 125.48, 125.25, 123.36, 115.75, 85.77, 82.50, 69.83, 64.82, 61.01, 58.23, 42.83, 29.11, 27.98, 27.06, 14.04. **HRMS (ESI)**  $m/z$  calcd for  $\text{C}_{32}\text{H}_{38}\text{Cl}_1\text{N}_3\text{O}_8$   $[\text{M}+\text{H}]^+$  628.2420, found 628.2419.

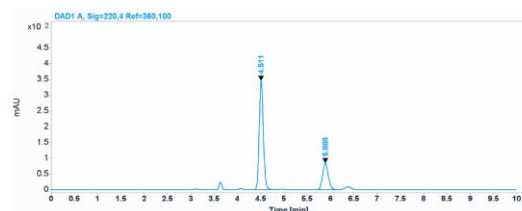

Signal: DAD1 A, Sig=220.4 Ref=360,100

| RT [min] | Width [min] | Area [mAU*s] | Height [mAU] | Area%   |
|----------|-------------|--------------|--------------|---------|
| 4.511    | 0.096       | 2132.297     | 346.580      | 74.6625 |
| 5.888    | 0.132       | 723.618      | 84.900       | 25.3375 |
| Sum      |             | 2855.9144    |              |         |

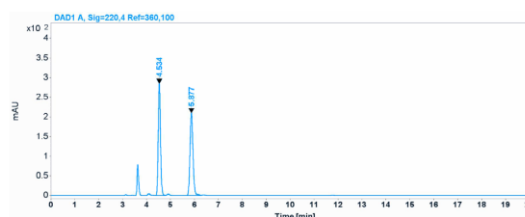

Signal: DAD1 A, Sig=220.4 Ref=360,100

| RT [min] | Width [min] | Area [mAU*s] | Height [mAU] | Area%   |
|----------|-------------|--------------|--------------|---------|
| 4.534    | 0.100       | 1847.348     | 285.343      | 50.5427 |
| 5.877    | 0.132       | 1807.678     | 210.037      | 49.4573 |
| Sum      |             | 3655.0254    |              |         |

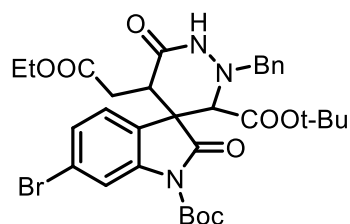

**7j**, white solid, m.p. =187.3-189.3°C, 56 mg, 52% yield, >20:1 dr, 60% ee (Chiralcel IA column, i-PrOH/n-hexane = 20/80, 1.0 mL/min,  $\lambda$  = 220 nm,  $t_{\text{major}}$  = 4.56 min,  $t_{\text{minor}}$  = 5.99 min);  $[\alpha]_{\text{D}}^{25}$  = -13.8 ( $c$  = 1.0,  $\text{CH}_2\text{Cl}_2$ ).  **$^1\text{H NMR}$**  (400 MHz,  $\text{CDCl}_3$ )  $\delta$  8.12 (s, 1H), 7.44 (d,  $J$  = 8.3 Hz, 3H), 7.40 – 7.29 (m, 3H), 7.25 (s, 1H), 7.05 (d,  $J$  = 8.0 Hz, 1H), 4.51 – 4.40 (m, 2H), 4.33 (s, 1H), 4.12 (q,  $J$  = 6.8 Hz, 2H), 3.76 (d,  $J$  = 10.4 Hz, 1H), 2.12 (dd,  $J$  = 16.2, 10.8 Hz, 1H), 1.84 (d,  $J$  = 16.2 Hz, 1H), 1.64 (s, 9H), 1.22 (t,  $J$  = 7.0 Hz, 3H), 0.93 (s, 9H).  **$^{13}\text{C NMR}$**  (101 MHz,  $\text{CDCl}_3$ )  $\delta$  174.13, 172.07, 170.55, 166.77, 148.32, 141.24, 135.87, 128.84, 128.80, 128.19, 128.10, 125.73, 123.87, 123.58, 118.48, 85.75, 82.50, 69.65, 64.75, 60.99, 58.25, 42.69, 29.07, 27.94, 27.01, 14.01. **HRMS (ESI)**  $m/z$  calcd for  $\text{C}_{32}\text{H}_{38}\text{Br}_1\text{N}_3\text{O}_8$   $[\text{M}+\text{H}]^+$  672.1915, found 672.1913.

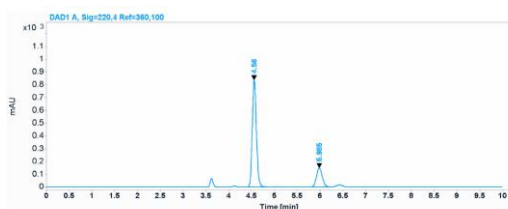

Signal: DAD1 A, Sig=220.4 Ref=360,100

| RT [min] | Width [min] | Area [mAU*s] | Height [mAU] | Area%   |
|----------|-------------|--------------|--------------|---------|
| 4.560    | 0.098       | 5318.936     | 836.512      | 80.0780 |
| 5.985    | 0.137       | 1323.178     | 149.599      | 19.9210 |
| Sum      |             | 6642.1141    |              |         |

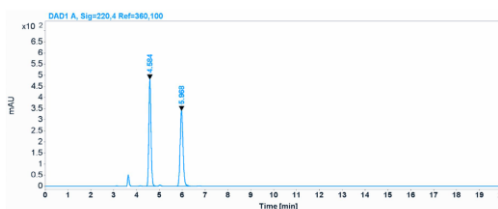

Signal: DAD1 A, Sig=220.4 Ref=360,100

| RT [min] | Width [min] | Area [mAU*s] | Height [mAU] | Area%   |
|----------|-------------|--------------|--------------|---------|
| 4.584    | 0.100       | 3125.278     | 482.862      | 51.2137 |
| 5.988    | 0.134       | 2977.151     | 340.952      | 48.7863 |
| Sum      |             | 6102.4285    |              |         |

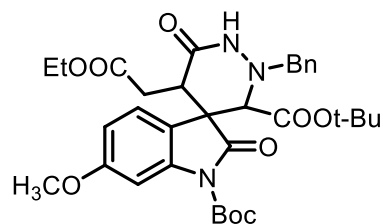

**7k**, white solid, m.p. =105.3-106.4°C, 99 mg, 80% yield, >20:1 dr, 70% ee (Chiralcel IA column, i-PrOH/n-hexane = 20/80, 1.0 mL/min,  $\lambda$  = 220 nm,  $t_{\text{major}}$  = 4.99 min,  $t_{\text{minor}}$  = 6.66 min);  $[\alpha]_{\text{D}}^{25}$  = 12.0 (c = 1.0, CH<sub>2</sub>Cl<sub>2</sub>). **<sup>1</sup>H NMR** (400 MHz, CDCl<sub>3</sub>)  $\delta$  7.51 (s, 1H), 7.47 (d,  $J$  = 7.2 Hz, 2H), 7.42 – 7.30 (m, 4H), 7.09 (d,  $J$  = 8.4 Hz, 1H), 6.63 (d,  $J$  = 8.4 Hz, 1H), 4.49 (s, 2H), 4.35 (s, 1H), 4.13 (q,  $J$  = 7.0 Hz, 2H), 3.75 (d,  $J$  = 10.6 Hz, 1H), 2.15 (dd,  $J$  = 16.0, 10.6 Hz, 1H), 1.88 (d,  $J$  = 16.2 Hz, 1H), 1.66 (s, 9H), 1.24 (t,  $J$  = 7.0 Hz, 3H), 0.94 (s, 9H). **<sup>13</sup>C NMR** (101 MHz, CDCl<sub>3</sub>)  $\delta$  175.20, 172.47, 170.83, 167.15, 160.96, 148.57, 141.31, 136.14, 128.90, 128.78, 128.03, 125.30, 116.60, 110.03, 102.40, 85.17, 82.11, 70.03, 64.87, 60.89, 58.10, 55.65, 43.07, 29.18, 28.03, 27.10, 14.05. **HRMS (ESI)**  $m/z$  calcd for C<sub>33</sub>H<sub>41</sub>N<sub>3</sub>O<sub>9</sub> [M+H]<sup>+</sup> 624.2916, found 624.2932.

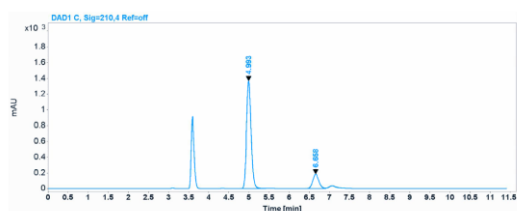

Signal: DAD1 C, Sig=210.4 Ref=off

| RT [min] | Width [min] | Area [mAU*s] | Height [mAU] | Area%   |
|----------|-------------|--------------|--------------|---------|
| 4.993    | 0.122       | 10832.946    | 1367.289     | 84.8757 |
| 6.658    | 0.164       | 1930.353     | 181.867      | 15.1243 |
| Sum      |             | 12763.3003   |              |         |

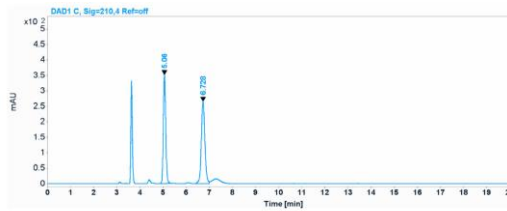

Signal: DAD1 C, Sig=210.4 Ref=off

| RT [min] | Width [min] | Area [mAU*s] | Height [mAU] | Area%   |
|----------|-------------|--------------|--------------|---------|
| 5.060    | 0.111       | 2561.870     | 350.377      | 47.8354 |
| 6.728    | 0.161       | 2793.720     | 264.956      | 52.1646 |
| Sum      |             | 5355.5901    |              |         |

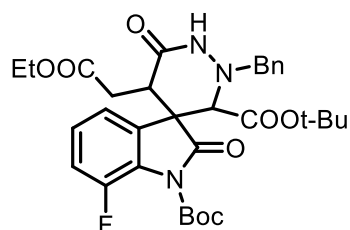

**7l**, white solid, m.p. =82.1-83.4°C, 76 mg, 63% yield, >20:1 dr, 85% ee (Chiralcel IA column, i-PrOH/n-hexane = 20/80, 1.0 mL/min,  $\lambda$  = 220 nm,  $t_{\text{major}}$  = 6.94 min,  $t_{\text{minor}}$  = 11.66 min);  $[\alpha]_{\text{D}}^{25}$  = 16.0 (c = 1.0, CH<sub>2</sub>Cl<sub>2</sub>). **<sup>1</sup>H NMR** (400 MHz, CDCl<sub>3</sub>)  $\delta$  7.47 (d,  $J$  = 7.2 Hz, 2H), 7.42 – 7.31 (m, 4H), 7.21 – 7.09 (m, 2H), 7.01 (d,  $J$  = 7.0 Hz, 1H), 4.51 (q,  $J$  = 13.2 Hz, 2H), 4.38 (s, 1H), 4.14 (q,  $J$  = 7.0 Hz, 2H), 3.82 (d,  $J$  = 10.6 Hz, 1H), 2.08 (dd,  $J$  = 16.2, 10.2 Hz, 1H), 1.90 (d,  $J$  = 16.2 Hz, 1H), 1.63 (s, 9H), 1.24 (t,  $J$  = 7.0 Hz, 3H), 0.98 (s, 9H). **<sup>13</sup>C NMR** (101 MHz, CDCl<sub>3</sub>)  $\delta$  174.10, 172.00, 170.59, 167.00, 146.99 ( $J$  = 29.2), 136.00, 128.87, 128.83, 128.26, 128.11, 126.90 ( $J$  = 8.8), 126.22 ( $J$  = 6.7), 120.63, 118.03 ( $J$  = 20.0), 85.88, 82.54, 69.40, 64.37, 61.00, 58.99, 42.90, 28.91, 27.64, 27.21, 14.03. **<sup>19</sup>F NMR** (377 MHz, CDCl<sub>3</sub>)  $\delta$  -119.8 ppm; **HRMS (ESI)**  $m/z$  calcd for C<sub>32</sub>H<sub>38</sub>F<sub>1</sub>N<sub>3</sub>O<sub>8</sub> [M+H]<sup>+</sup> 612.2716, found 612.2721.



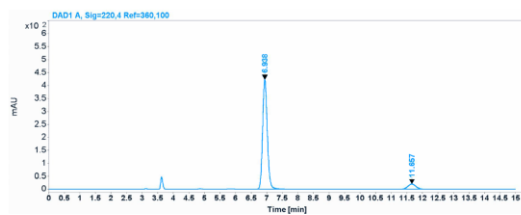

Signal: DAD1 A, Sig=220.4 Ref=360,100

| RT [min] | Width [min] | Area [mAU*s] | Height [mAU] | Area%   |
|----------|-------------|--------------|--------------|---------|
| 6.938    | 0.161       | 4360.824     | 422.838      | 92.6147 |
| 11.657   | 0.283       | 350.116      | 19.327       | 7.3853  |
| Sum      |             | 4740.7399    |              |         |

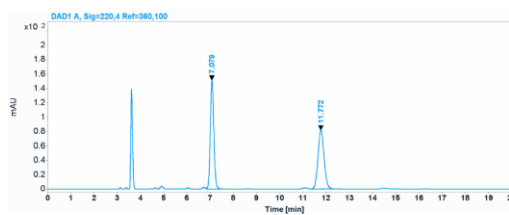

Signal: DAD1 A, Sig=220.4 Ref=360,100

| RT [min] | Width [min] | Area [mAU*s] | Height [mAU] | Area%   |
|----------|-------------|--------------|--------------|---------|
| 7.079    | 0.163       | 1595.902     | 151.293      | 51.7006 |
| 11.772   | 0.282       | 1490.913     | 81.944       | 48.2994 |
| Sum      |             | 3086.8156    |              |         |

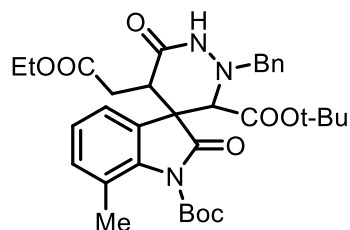

**7m**, white solid, m.p. =77.3-75.8°C, 40 mg, 33% yield, >20:1 dr, 20% ee.  $^1\text{H NMR}$  (400 MHz,  $\text{CDCl}_3$ )  $\delta$  7.46 (d,  $J = 7.2$  Hz, 2H), 7.40 – 7.32 (m, 3H), 7.18 – 7.11 (m, 1H), 7.05 – 6.99 (m, 2H), 4.59 – 4.43 (m, 2H), 4.37 (s, 1H), 4.13 (q,  $J = 7.2$  Hz, 2H), 3.79 (dd,  $J = 10.6, 3.2$  Hz, 1H), 2.26 (s, 3H), 2.08 (dd,  $J = 16.6, 10.6$  Hz, 1H), 1.88 (dd,  $J = 16.6, 3.2$  Hz, 1H), 1.65 (s, 9H), 1.24 (t,  $J = 7.2$  Hz, 3H), 0.94 (s, 9H).  $^{13}\text{C NMR}$  (101 MHz,  $\text{CDCl}_3$ )  $\delta$  175.44, 172.25, 170.91, 167.26, 148.83, 138.45, 136.28, 132.60, 128.79, 128.00, 125.92, 124.99, 122.81, 122.42, 85.54, 82.30, 69.53, 64.44, 60.86, 58.54, 43.01, 28.91, 27.74, 27.16, 19.43, 14.04. **HRMS (ESI)**  $m/z$  calcd for  $\text{C}_{33}\text{H}_{41}\text{N}_3\text{O}_8$   $[\text{M}+\text{H}]^+$  608.2966, found 608.2965.

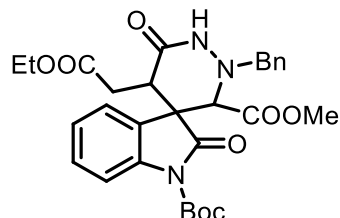

**7n**, white solid, m.p. =170.6-172.3°C, 36 mg, 33% yield, >20:1 dr, 85% ee (Chiralcel IA column,  $i$ -PrOH/ $n$ -hexane = 20/80, 1.0 mL/min,  $\lambda = 210$  nm,  $t_{\text{major}} = 9.29$  min,  $t_{\text{minor}} = 12.52$  min);  $[\alpha]_{\text{D}}^{25} = -19.4$  (c = 1.0,  $\text{CH}_2\text{Cl}_2$ ).  $^1\text{H NMR}$  (400 MHz,  $\text{CDCl}_3$ )  $\delta$  7.86 (d,  $J = 8.0$  Hz, 1H), 7.46 (d,  $J = 7.0$  Hz, 2H), 7.42 – 7.31 (m, 5H), 7.12 (s, 2H), 4.63 – 4.43 (m, 3H), 4.14 (q,  $J = 6.8$  Hz, 2H), 3.90 (d,  $J = 10.4$  Hz, 1H), 3.05 (s, 3H), 2.20 (dd,  $J = 16.6, 11.0$  Hz, 1H), 1.84 (d,  $J = 16.6$  Hz, 1H), 1.69 (s, 9H), 1.24 (t,  $J = 7.0$  Hz, 3H).  $^{13}\text{C NMR}$  (101 MHz,  $\text{CDCl}_3$ )  $\delta$  174.94, 172.37, 170.69, 168.76, 148.57, 139.83, 135.97, 129.73, 128.97, 128.84, 128.13, 125.05, 124.83, 124.03, 114.96, 85.37, 69.94, 63.91, 60.95, 58.87, 51.53, 42.61, 29.34, 28.08, 14.03. **HRMS (ESI)**  $m/z$  calcd for  $\text{C}_{29}\text{H}_{33}\text{N}_3\text{O}_8$   $[\text{M}+\text{H}]^+$  552.2340, found 552.2330.

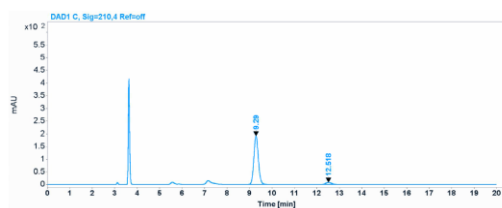

Signal: DAD1 C, Sig=210.4 Ref=off

| RT [min] | Width [min] | Area [mAU·S] | Height [mAU] | Area%   |
|----------|-------------|--------------|--------------|---------|
| 8.152    | 0.215       | 2630.997     | 190.758      | 94.5301 |
| 12.518   | 0.285       | 152.240      | 7.832        | 5.4699  |
| Sum      |             | 2783.2365    |              |         |

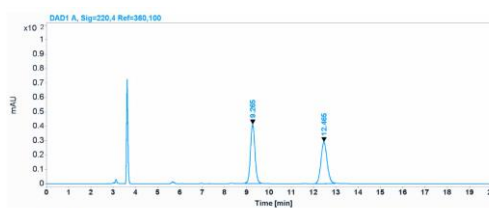

Signal: DAD1 A, Sig=220.4 Ref=360,100

| RT [min] | Width [min] | Area [mAU·S] | Height [mAU] | Area%   |
|----------|-------------|--------------|--------------|---------|
| 9.265    | 0.216       | 568.761      | 41.077       | 50.6686 |
| 12.465   | 0.268       | 553.752      | 28.798       | 49.3314 |
| Sum      |             | 1122.5129    |              |         |

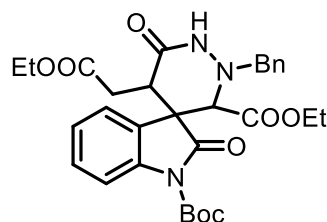

**7o**, white solid, m.p. =158.5-160.5°C, 67 mg, 60% yield, >20:1 dr, 91% ee (Chiralcel IA column, *i*-PrOH/*n*-hexane = 20/80, 1.0 mL/min,  $\lambda$  = 220 nm,  $t_{\text{major}}$  = 8.15 min,  $t_{\text{minor}}$  = 11.62 min);  $[\alpha]_{\text{D}}^{25}$  = -14.2 ( $c$  = 1.0,  $\text{CH}_2\text{Cl}_2$ ).  $^1\text{H NMR}$  (400 MHz,  $\text{CDCl}_3$ )  $\delta$  7.83 (d,  $J$  = 8.2 Hz, 1H), 7.45 (d,  $J$  = 7.6 Hz, 2H), 7.41 – 7.29 (m, 5H), 7.18 – 7.06 (m, 2H), 4.60 – 4.43 (m, 3H), 4.12 (q,  $J$  = 7.2 Hz, 2H), 3.86 (d,  $J$  = 8.6 Hz, 1H), 3.69 – 3.56 (m, 1H), 3.41 – 3.29 (m, 1H), 2.16 (dd,  $J$  = 16.6, 10.6 Hz, 1H), 1.84 (d,  $J$  = 16.2 Hz, 1H), 1.67 (s, 9H), 1.22 (t,  $J$  = 7.2 Hz, 3H), 0.68 (t,  $J$  = 7.2 Hz, 3H).  $^{13}\text{C NMR}$  (101 MHz,  $\text{CDCl}_3$ )  $\delta$  174.93, 172.33, 170.71, 168.26, 148.55, 140.01, 136.00, 129.74, 128.96, 128.84, 128.12, 125.15, 124.80, 124.24, 114.94, 85.32, 69.81, 64.28, 61.01, 60.95, 58.74, 42.73, 29.27, 28.06, 14.04, 13.19. **HRMS (ESI)**  $m/z$  calcd for  $\text{C}_{30}\text{H}_{35}\text{N}_3\text{O}_8$   $[\text{M}+\text{H}]^+$  566.2497, found 566.2494.

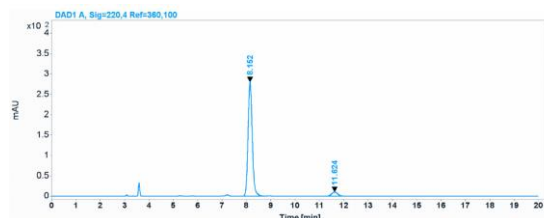

Signal: DAD1 A, Sig=220.4 Ref=360,100

| RT [min] | Width [min] | Area [mAU·S] | Height [mAU] | Area%   |
|----------|-------------|--------------|--------------|---------|
| 8.152    | 0.183       | 3346.564     | 280.236      | 94.5512 |
| 11.624   | 0.282       | 177.947      | 9.994        | 5.0488  |
| Sum      |             | 3524.5109    |              |         |

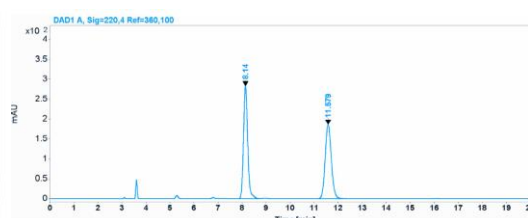

Signal: DAD1 A, Sig=220.4 Ref=360,100

| RT [min] | Width [min] | Area [mAU·S] | Height [mAU] | Area%   |
|----------|-------------|--------------|--------------|---------|
| 8.140    | 0.184       | 3396.986     | 282.527      | 50.7627 |
| 11.579   | 0.274       | 3294.907     | 186.158      | 49.2373 |
| Sum      |             | 6691.8931    |              |         |

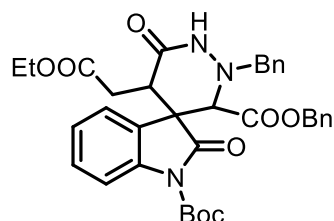

**7p**, white solid, m.p. =64.7-65.8°C, 68 mg, 55% yield, >20:1 dr, 92% ee (Chiralcel IA column, *i*-PrOH/*n*-hexane = 20/80, 1.0 mL/min,  $\lambda$  = 220 nm,  $t_{\text{major}}$  = 7.76 min,  $t_{\text{minor}}$  = 11.47 min);  $[\alpha]_{\text{D}}^{25}$  = 2.8 ( $c$  = 1.0,  $\text{CH}_2\text{Cl}_2$ ).  $^1\text{H NMR}$  (400 MHz,  $\text{CDCl}_3$ )  $\delta$  7.76 (d,  $J$  = 8.2 Hz, 1H), 7.45 (m, 3H), 7.41 – 7.22 (m, 7H), 7.14 (m, 2H), 6.89 (d,  $J$  = 6.8 Hz, 2H), 4.70 (d,  $J$  = 11.9 Hz, 1H), 4.64 – 4.43 (m, 3H), 4.16 – 4.08 (m,

3H), 3.88 (d,  $J = 10.6$  Hz, 1H), 2.15 (dd,  $J = 16.0, 11.0$  Hz, 1H), 1.83 (d,  $J = 16.4$  Hz, 1H), 1.62 (s, 9H), 1.23 (t,  $J = 6.8$  Hz, 3H).  $^{13}\text{C}$  NMR (101 MHz,  $\text{CDCl}_3$ )  $\delta$  174.77, 172.33, 170.68, 168.25, 154.47, 148.37, 139.84, 135.99, 134.14, 129.78, 128.94, 128.85, 128.46, 128.38, 128.13, 125.10, 124.62, 124.06, 115.16, 85.18, 69.87, 67.07, 64.16, 60.95, 58.80, 42.86, 29.21, 28.03, 14.03. HRMS (ESI)  $m/z$  calcd for  $\text{C}_{35}\text{H}_{37}\text{N}_3\text{O}_8$   $[\text{M}+\text{H}]^+$  628.2653, found 628.2648.

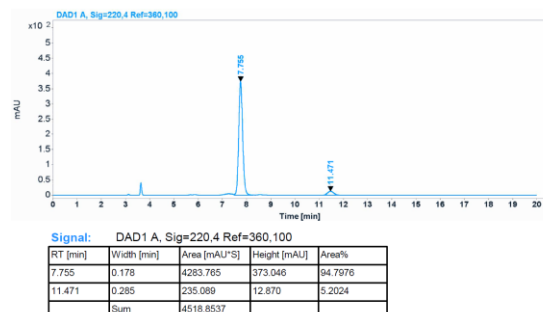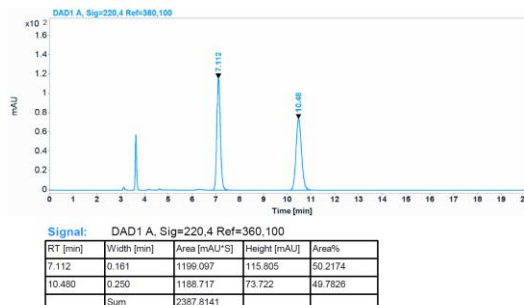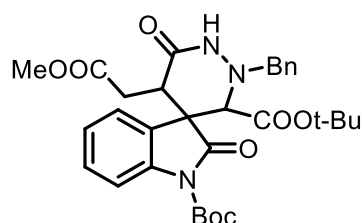

**7q**, white solid, m.p. =90.2-91.5°C, 86 mg, 75% yield, >20:1 dr, 90% ee (Chiralcel IA column, i-PrOH/n-hexane = 20/80, 1.0 mL/min,  $\lambda = 220$  nm,  $t_{\text{major}} = 7.16$  min,  $t_{\text{minor}} = 10.50$  min);  $[\alpha]_{\text{D}}^{25} = 6.6$  ( $c = 1.0$ ,  $\text{CH}_2\text{Cl}_2$ ).  $^1\text{H}$  NMR (400 MHz,  $\text{CDCl}_3$ )  $\delta$  7.88 (d,  $J = 8.2$  Hz, 1H), 7.48 (d,  $J = 7.8$  Hz, 3H), 7.42 – 7.30 (m, 4H), 7.21 (d,  $J = 7.4$  Hz, 1H), 7.12 (t,  $J = 7.4$  Hz, 1H), 4.54 – 4.46 (m, 2H), 4.38 (s, 1H), 3.77 (d,  $J = 10.4$  Hz, 1H), 3.67 (s, 3H), 2.15 (dd,  $J = 16.2, 10.6$  Hz, 1H), 1.88 (d,  $J = 16.2$  Hz, 1H), 1.66 (s, 9H), 0.89 (s, 9H).  $^{13}\text{C}$  NMR (101 MHz,  $\text{CDCl}_3$ )  $\delta$  174.73, 172.31, 171.28, 166.99, 148.62, 140.23, 136.06, 129.75, 128.92, 128.81, 128.07, 125.35, 124.91, 124.57, 114.96, 85.20, 82.25, 69.76, 64.84, 58.45, 52.02, 42.98, 28.96, 28.03, 26.98. HRMS (ESI)  $m/z$  calcd for  $\text{C}_{31}\text{H}_{37}\text{N}_3\text{O}_8$   $[\text{M}+\text{H}]^+$  580.2653, found 580.2659.

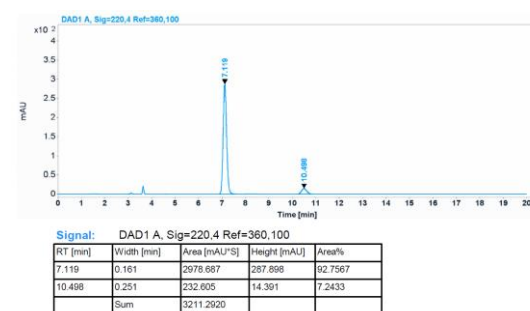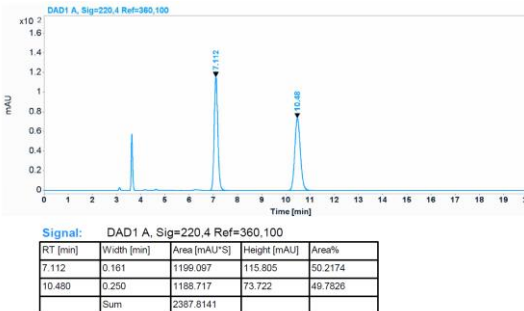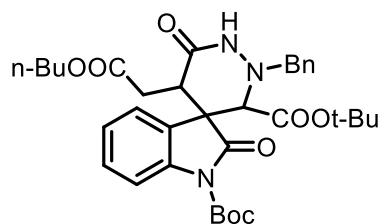

**7r**, white solid, m.p. =98.5-100.4°C, 86 mg, 70% yield, >20:1 dr, 90% ee (Chiralcel IA column, i-PrOH/n-hexane = 20/80, 1.0 mL/min,  $\lambda = 220$  nm,  $t_{\text{major}} = 5.71$  min,  $t_{\text{minor}} = 6.37$  min);  $[\alpha]_{\text{D}}^{25} = 5.6$  ( $c = 1.0$ ,

CH<sub>2</sub>Cl<sub>2</sub>). <sup>1</sup>H NMR (400 MHz, CDCl<sub>3</sub>) δ 7.88 (d, *J* = 8.2 Hz, 1H), 7.49 – 7.29 (m, 7H), 7.21 (d, *J* = 7.6 Hz, 1H), 7.12 (t, *J* = 7.6 Hz, 1H), 4.56 – 4.46 (s, 2H), 4.38 (s, 1H), 4.08 (t, *J* = 6.4 Hz, 2H), 3.79 (d, *J* = 10.6 Hz, 1H), 2.12 (dd, *J* = 16.2, 11.0 Hz, 1H), 1.88 (d, *J* = 16.4 Hz, 1H), 1.66 (s, 9H), 1.62 – 1.54 (m, 2H), 1.42 – 1.30 (m, 2H), 0.98 – 0.81 (m, 12H). <sup>13</sup>C NMR (101 MHz, CDCl<sub>3</sub>) δ 174.82, 172.35, 170.81, 167.00, 148.63, 140.22, 136.14, 129.71, 128.87, 128.79, 128.05, 125.35, 124.97, 124.59, 114.97, 85.19, 82.22, 69.91, 64.90, 64.83, 58.49, 42.92, 30.52, 29.14, 28.03, 26.99, 19.06, 13.66. HRMS (ESI) *m/z* calcd for C<sub>34</sub>H<sub>43</sub>N<sub>3</sub>O<sub>8</sub> [M+H]<sup>+</sup> 622.3123, found 622.3117.

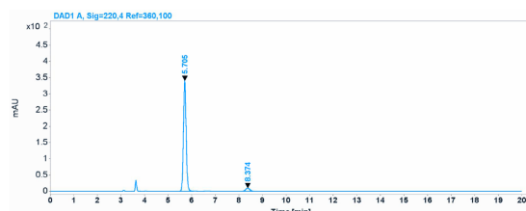

Signal: DAD1 A, Sig=220.4 Ref=360.100

| RT [min] | Width [min] | Area [mAU·S] | Height [mAU] | Area%   |
|----------|-------------|--------------|--------------|---------|
| 5.705    | 0.125       | 2768.875     | 340.126      | 95.8138 |
| 8.374    | 0.195       | 121.010      | 9.588        | 4.1862  |
| Sum      |             | 2890.8843    |              |         |

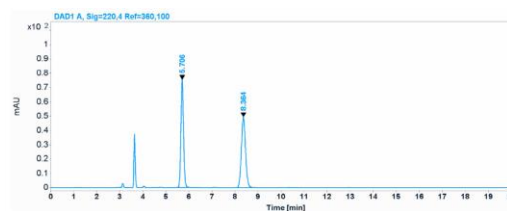

Signal: DAD1 A, Sig=220.4 Ref=360.100

| RT [min] | Width [min] | Area [mAU·S] | Height [mAU] | Area%   |
|----------|-------------|--------------|--------------|---------|
| 5.706    | 0.126       | 807.591      | 75.297       | 49.2948 |
| 8.364    | 0.188       | 825.387      | 49.175       | 50.7052 |
| Sum      |             | 1233.3785    |              |         |

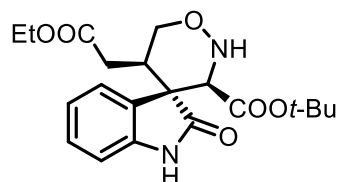

**8**, yellow oil, 59 mg, 78% yield, 94% ee (Chiralcel IA column, *i*-PrOH/*n*-hexane = 20/80, 1.0 mL/min, λ = 210 nm, *t*<sub>major</sub> = 13.46 min, *t*<sub>minor</sub> = 10.71 min). <sup>1</sup>H NMR (400 MHz, CDCl<sub>3</sub>) δ 9.31 (s, 1H), 7.82 (d, *J* = 7.6 Hz, 1H), 7.38-7.17 (m, 1H), 7.11-6.91 (m, 2H), 5.97 (s, 1H), 4.29 (s, 1H), 4.18 (dd, *J* = 11.6, 4.8 Hz, 1H), 4.00 (q, *J* = 7.2 Hz, 2H), 3.89 (t, *J* = 11.6 Hz, 1H), 2.91-2.80 (m, 1H), 2.00 (dd, *J* = 16.4, 3.2 Hz, 1H), 1.55 (dd, *J* = 16.4, 11.2 Hz, 1H), 1.14 (t, *J* = 7.2 Hz, 3H), 1.06 (s, 9H) ppm; <sup>13</sup>C NMR (100 MHz, CDCl<sub>3</sub>) δ 179.3, 171.1, 166.4, 142.0, 128.9, 127.8, 126.4, 122.5, 110.1, 83.3, 69.7, 64.3, 60.8, 52.6, 39.3, 31.4, 27.4, 27.2, 14.1 ppm. HRMS (ESI) *m/z* calcd for C<sub>27</sub>H<sub>34</sub>N<sub>2</sub>O<sub>9</sub> [M+H]<sup>+</sup> 391.1864, found 391.1867.

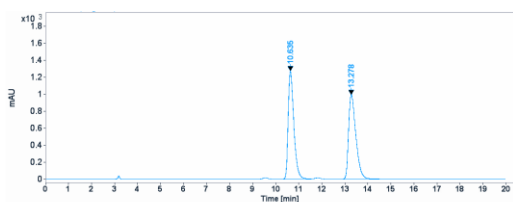

Signal: DAD1 C, Sig=210.4 Ref=off

| RT [min] | Width [min] | Area [mAU·S] | Height [mAU] | Area%   |
|----------|-------------|--------------|--------------|---------|
| 10.635   | 0.261       | 21776.484    | 1274.530     | 49.9735 |
| 13.278   | 0.335       | 21795.578    | 996.548      | 50.0265 |
| Sum      |             | 43572.0625   |              |         |

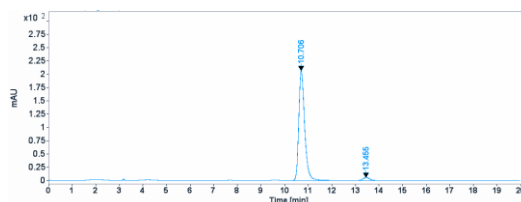

Signal: DAD1 C, Sig=210.4 Ref=off

| RT [min] | Width [min] | Area [mAU·S] | Height [mAU] | Area%   |
|----------|-------------|--------------|--------------|---------|
| 10.706   | 0.288       | 3571.150     | 206.733      | 67.0607 |
| 13.455   | 0.275       | 107.008      | 5.511        | 2.9093  |
| Sum      |             | 3678.1585    |              |         |

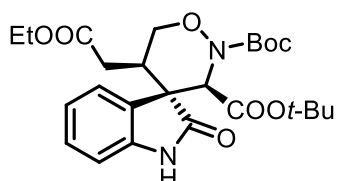

**9**, yellow oil, 37 mg, 76% yield, 95% ee (Chiralcel IA column, i-PrOH/n-hexane = 10/90, 1.0 mL/min,  $\lambda = 210$  nm,  $t_{\text{major}} = 24.62$  min,  $t_{\text{minor}} = 27.98$  min).  $^1\text{H NMR}$  (400 MHz,  $\text{CDCl}_3$ )  $\delta$  9.13 (s, 1H), 7.69-7.48 (m, 1H), 7.38-7.16 (m, 1H), 7.13-6.93 (m, 2H), 4.94 (s, 1H), 4.72 (dd,  $J = 10.0, 7.6$  Hz, 1H), 4.02 (qd,  $J = 7.2, 2.8$  Hz, 2H), 3.67 (t,  $J = 10.0$  Hz, 1H), 3.09-2.87 (m, 1H), 2.27 (dd,  $J = 16.0, 3.6$  Hz, 1H), 1.65 (dd,  $J = 16.0, 11.2$  Hz, 1H), 1.49 (s, 9H), 1.17 (t,  $J = 7.2$  Hz, 3H), 0.96 (s, 9H) ppm;  $^{13}\text{C NMR}$  (100 MHz,  $\text{CDCl}_3$ )  $\delta$  179.2, 170.7, 166.2, 154.6, 142.4, 129.4, 128.1, 126.0, 123.4, 110.3, 82.5, 82.4, 71.2, 65.1, 61.0, 53.2, 35.9, 33.3, 28.3, 27.2, 14.2 ppm. **HRMS (ESI)**  $m/z$  calcd for  $\text{C}_{25}\text{H}_{34}\text{N}_2\text{O}_8$   $[\text{M}+\text{Na}]^+$  513.2207, found 513.2204.

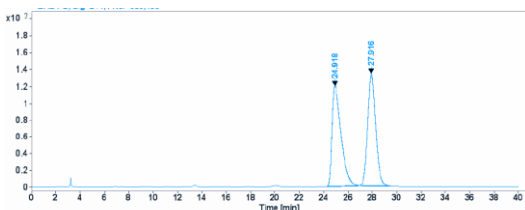

Signal: DAD1 C, Sig=214.4 Ref=360.100

| RT [min] | Width [min] | Area [mAU·S] | Height [mAU] | Area%   |
|----------|-------------|--------------|--------------|---------|
| 24.918   | 0.748       | 6163.124     | 120.313      | 50.0016 |
| 27.916   | 0.711       | 6162.722     | 133.926      | 49.9984 |
| Sum      |             | 12325.8452   |              |         |

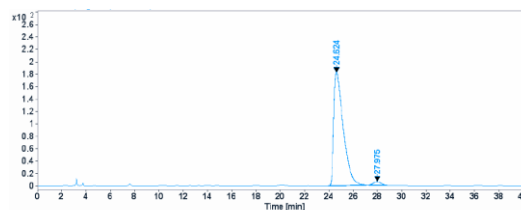

Signal: DAD1 C, Sig=214.4 Ref=360.100

| RT [min] | Width [min] | Area [mAU·S] | Height [mAU] | Area%   |
|----------|-------------|--------------|--------------|---------|
| 24.824   | 0.782       | 9860.643     | 182.682      | 97.3700 |
| 27.975   | 0.524       | 266.337      | 6.088        | 2.6300  |
| Sum      |             | 10126.9800   |              |         |

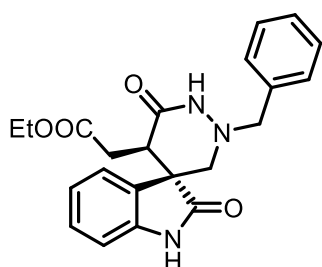

**10**, white solid, 64 mg, 82% yield, 91% ee (Chiralcel IA column, i-PrOH/n-hexane = 20/80, 1.0 mL/min,  $\lambda = 210$  nm,  $t_{\text{major}} = 11.07$  min,  $t_{\text{minor}} = 14.01$  min);  $[\alpha]_{\text{D}}^{25} = 13.2$  ( $c = 1.0, \text{CHCl}_3$ ).  $^1\text{H NMR}$  (400 MHz,  $\text{CDCl}_3$ )  $\delta$  8.57 (s, 1H), 7.43 – 7.29 (m, 5H), 7.24 (d,  $J = 7.0$  Hz, 2H), 7.11 – 7.02 (m, 1H), 6.92 (d,  $J = 7.8$  Hz, 1H), 4.29 (d,  $J = 13.0$  Hz, 1H), 4.18 (d,  $J = 13.0$  Hz, 1H), 4.10 (q,  $J = 7.2$  Hz, 2H), 3.88 (dd,  $J =$

10.0, 3.8 Hz, 1H), 3.43 (d,  $J = 13.0$  Hz, 1H), 3.25 (d,  $J = 13.0$  Hz, 1H), 2.38 (dd,  $J = 16.4, 10.0$  Hz, 1H), 1.79 (dd,  $J = 16.4, 3.8$  Hz, 1H), 1.20 (t,  $J = 7.2$  Hz, 3H).  $^{13}\text{C}$  NMR (101 MHz,  $\text{CDCl}_3$ )  $\delta$  178.98, 171.49, 171.29, 140.23, 135.65, 129.18, 129.11, 129.03, 128.73, 128.09, 124.94, 123.39, 110.15, 62.31, 60.72, 59.48, 53.83, 41.09, 30.48, 14.00. **HRMS (ESI)**  $m/z$  calcd for  $\text{C}_{22}\text{H}_{23}\text{N}_3\text{O}_4$   $[\text{M}+\text{H}]^+$  394.1761, found 394.1767.

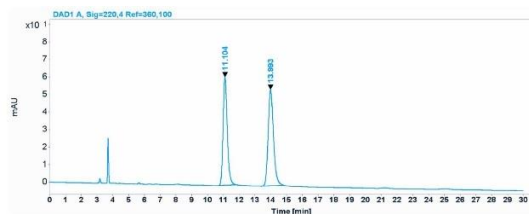

Signal: DAD1 A, Sig=220.4 Ref=360,100

| RT [min] | Width [min] | Area [mAU <sup>2</sup> S] | Height [mAU] | Area%   |
|----------|-------------|---------------------------|--------------|---------|
| 11.104   | 0.281       | 1135.527                  | 61.735       | 46.9095 |
| 13.993   | 0.358       | 1285.147                  | 54.807       | 53.0905 |
| Sum      |             | 2420.6744                 |              |         |

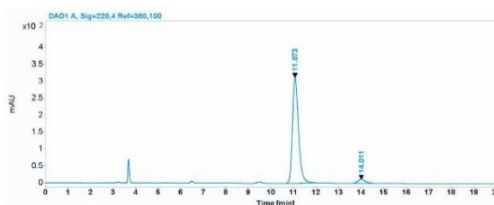

Signal: DAD1 A, Sig=220.4 Ref=360,100

| RT [min] | Width [min] | Area [mAU <sup>2</sup> S] | Height [mAU] | Area%   |
|----------|-------------|---------------------------|--------------|---------|
| 11.073   | 0.283       | 5744.892                  | 311.162      | 95.6481 |
| 14.011   | 0.365       | 261.389                   | 11.101       | 4.3519  |
| Sum      |             | 6006.2807                 |              |         |

## 4. <sup>1</sup>H and <sup>13</sup>C NMR spectra

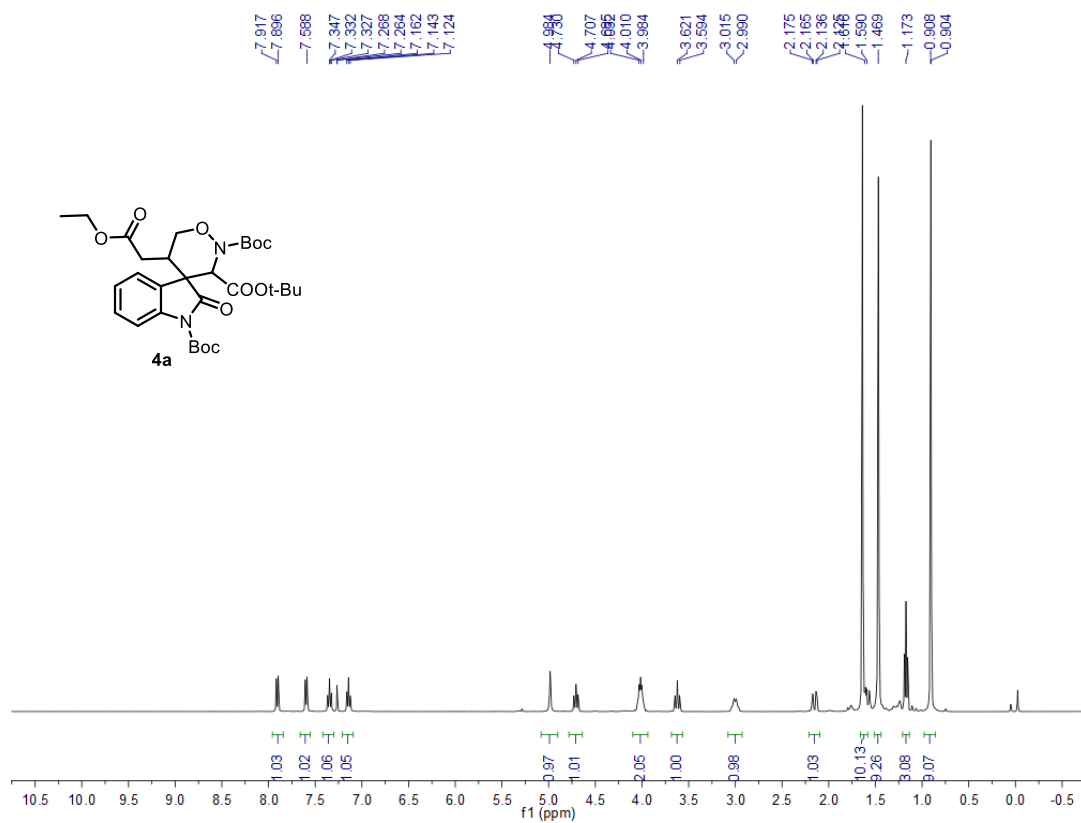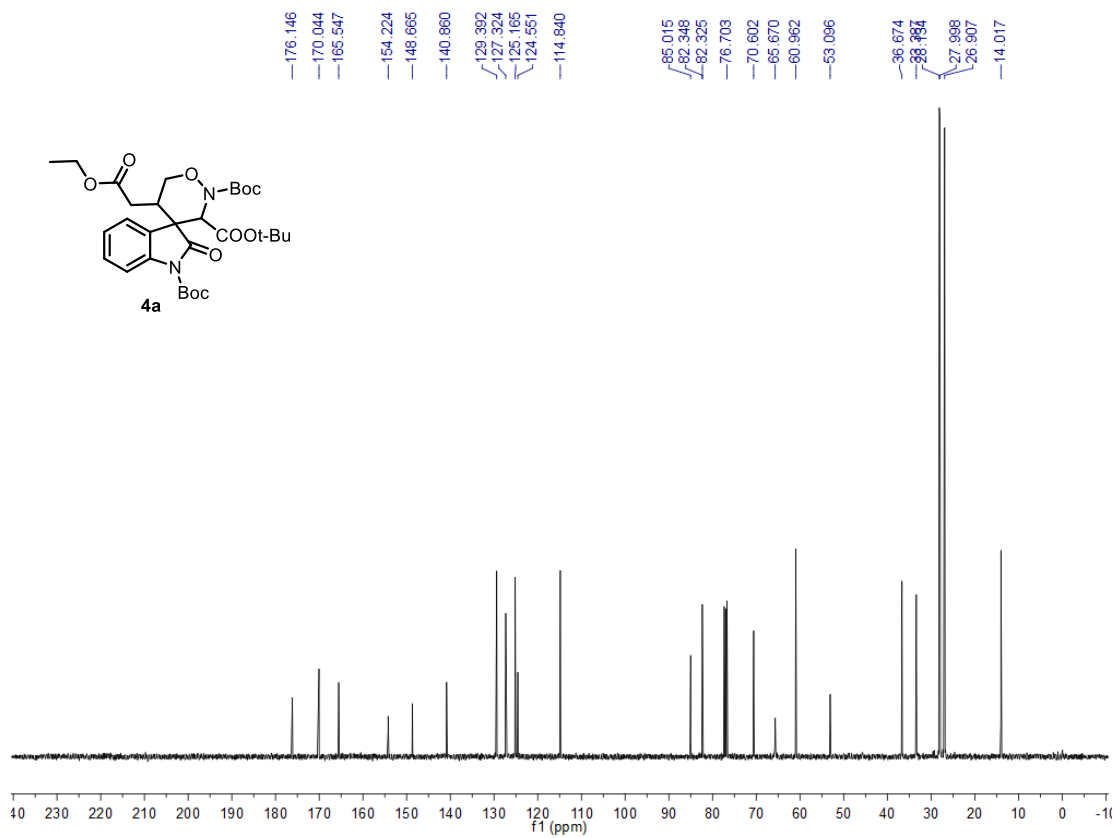

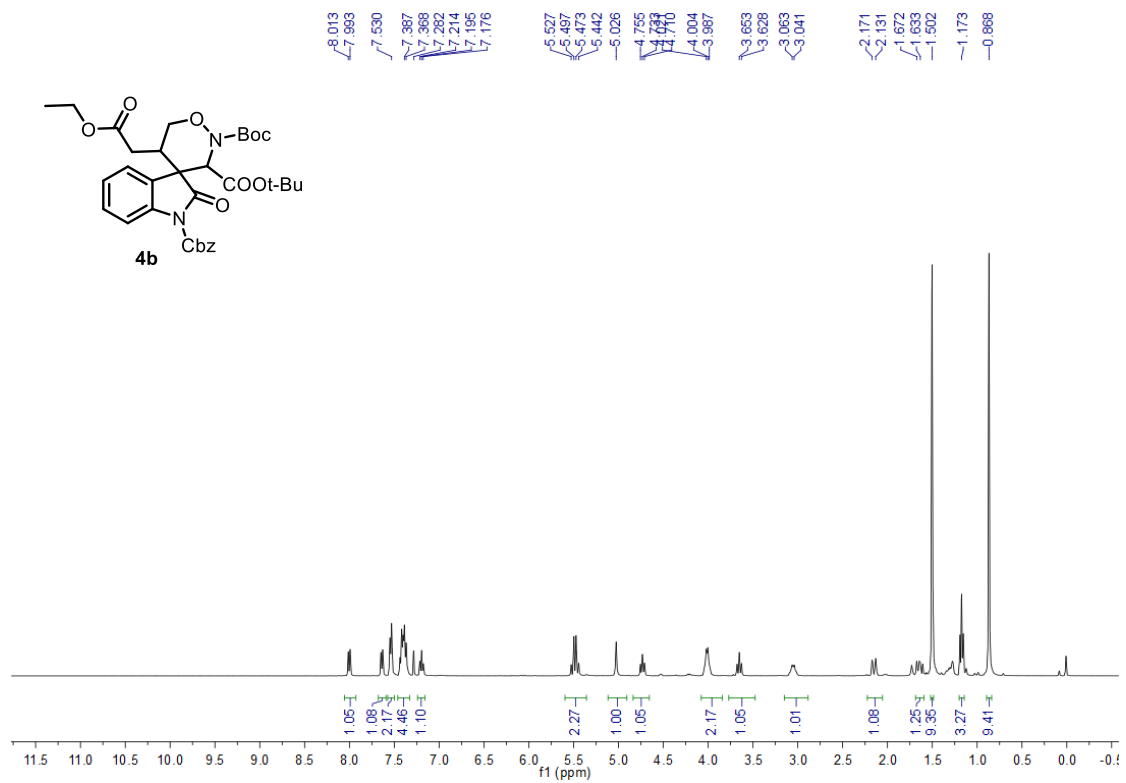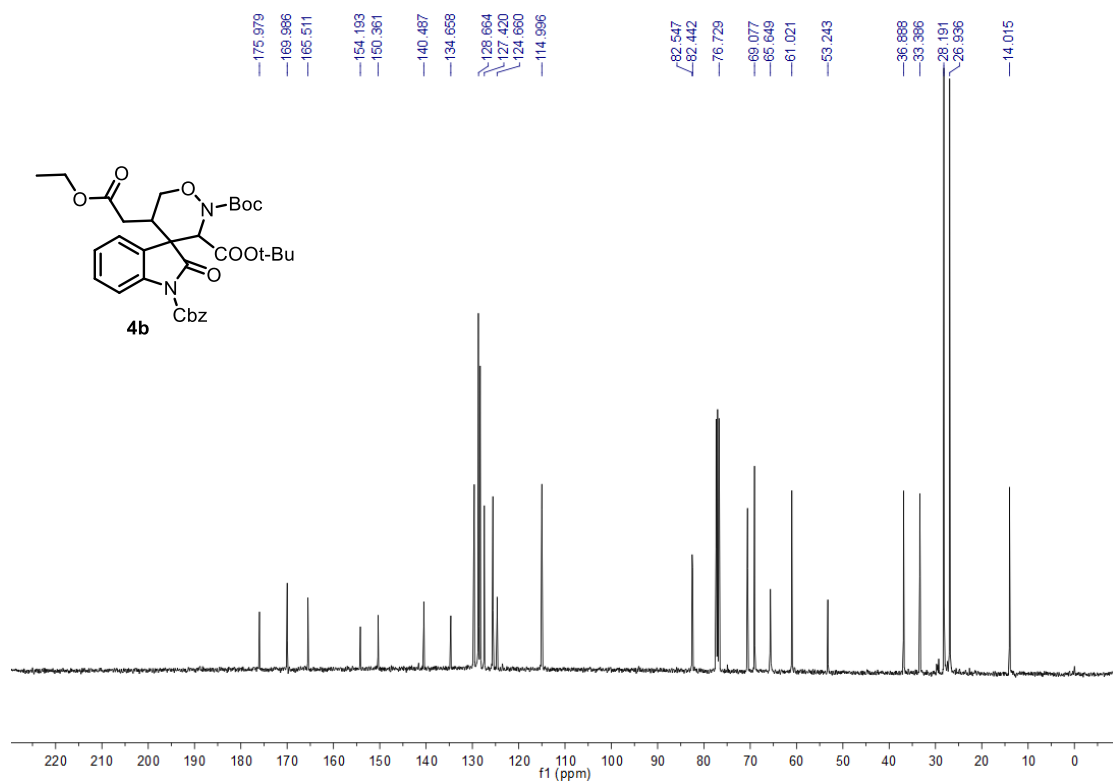



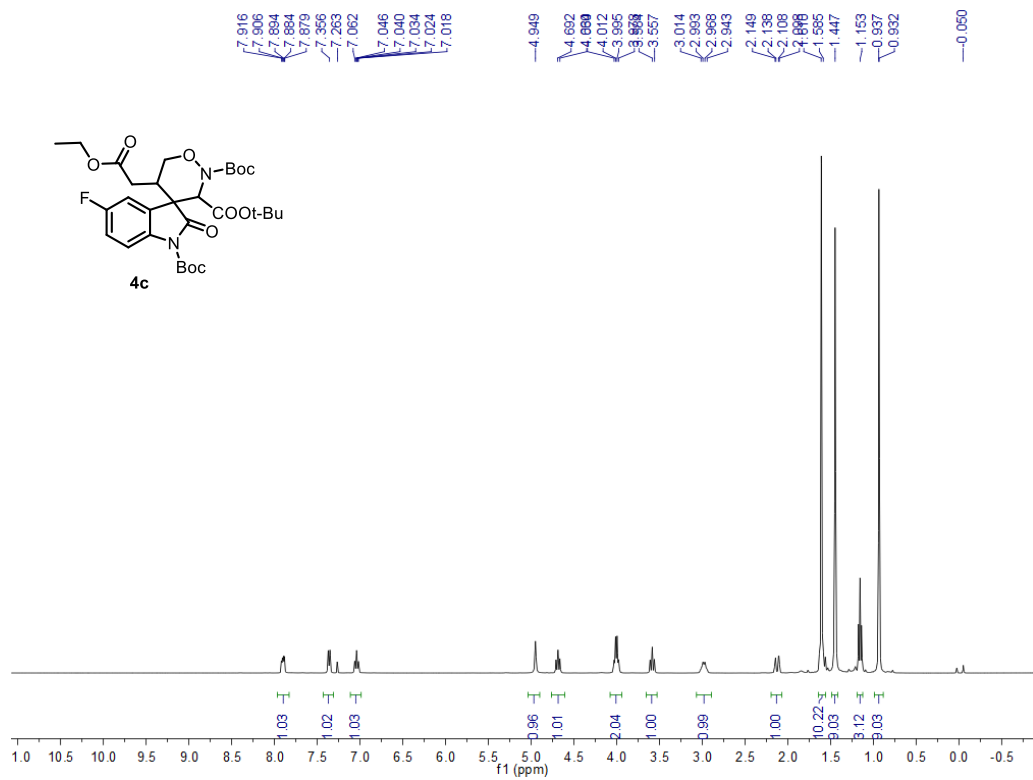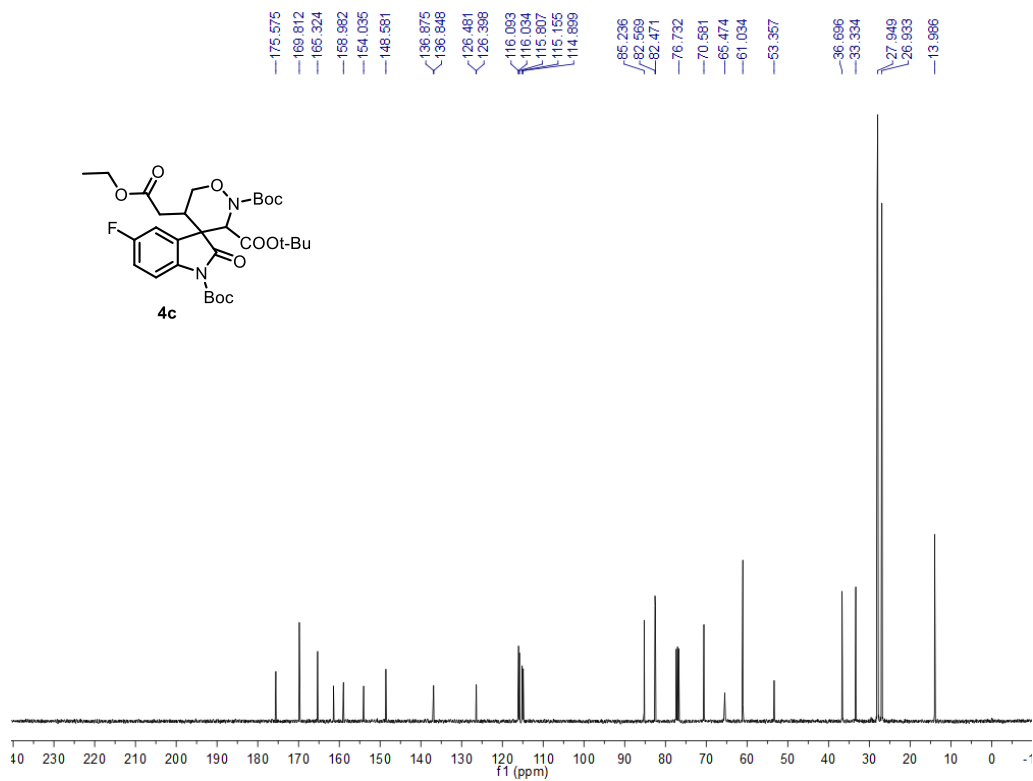

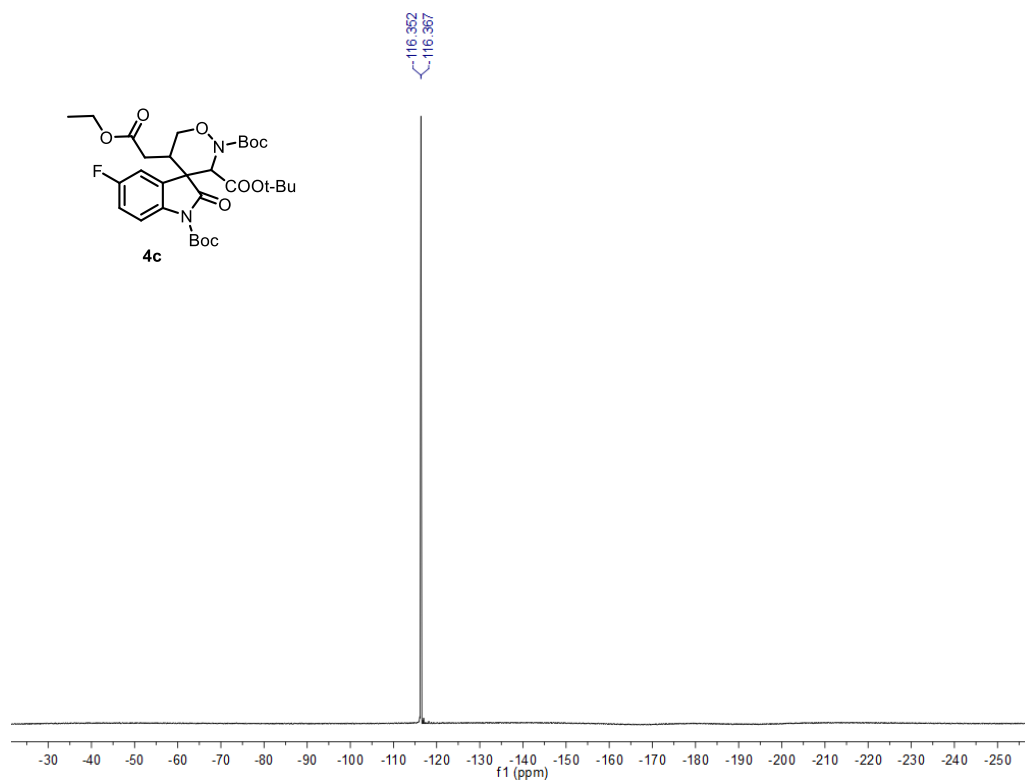

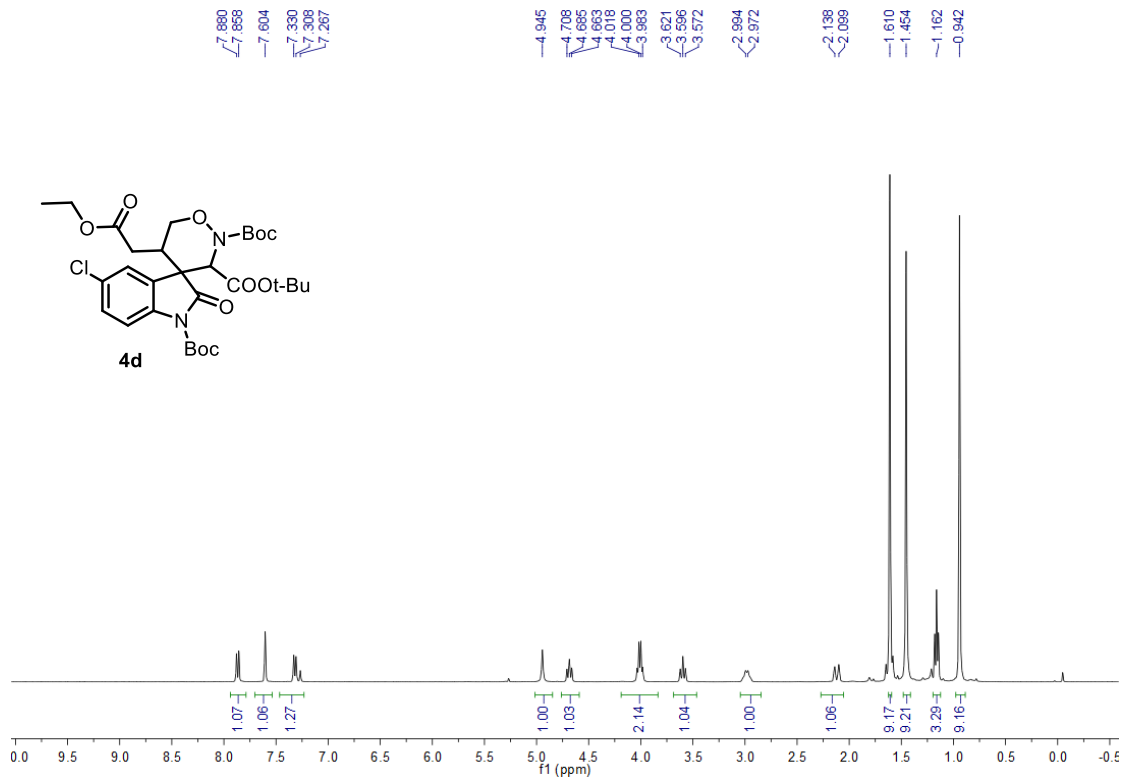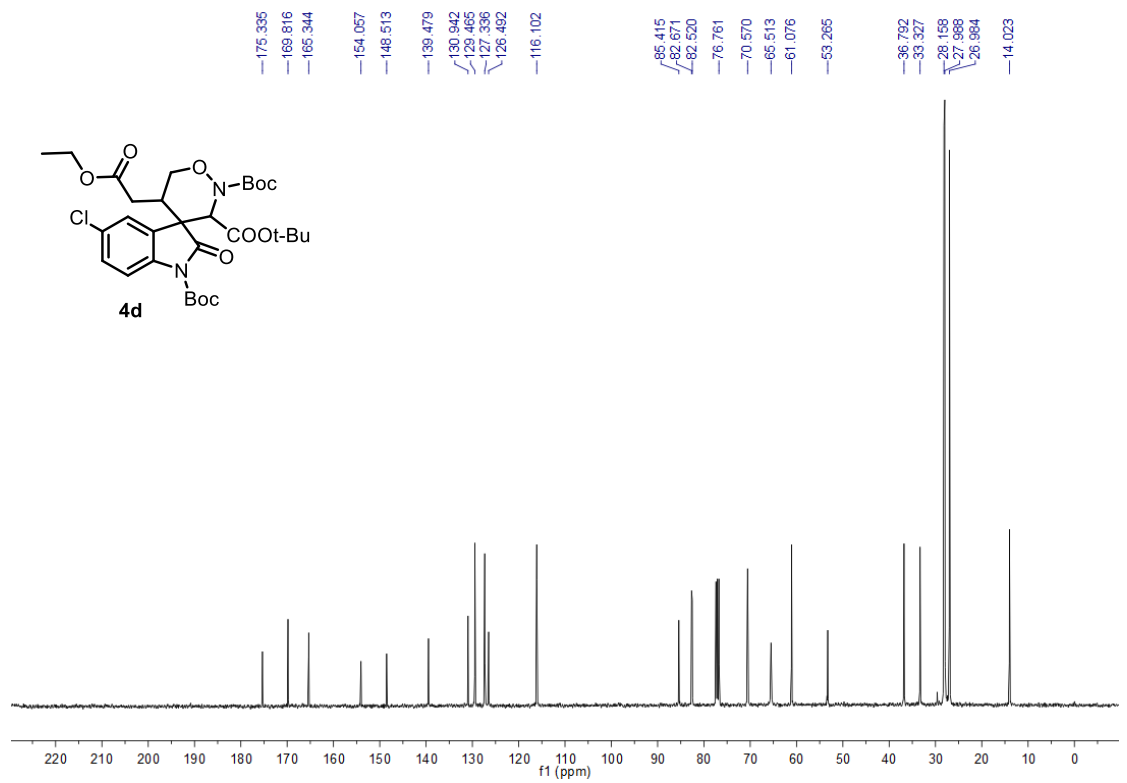

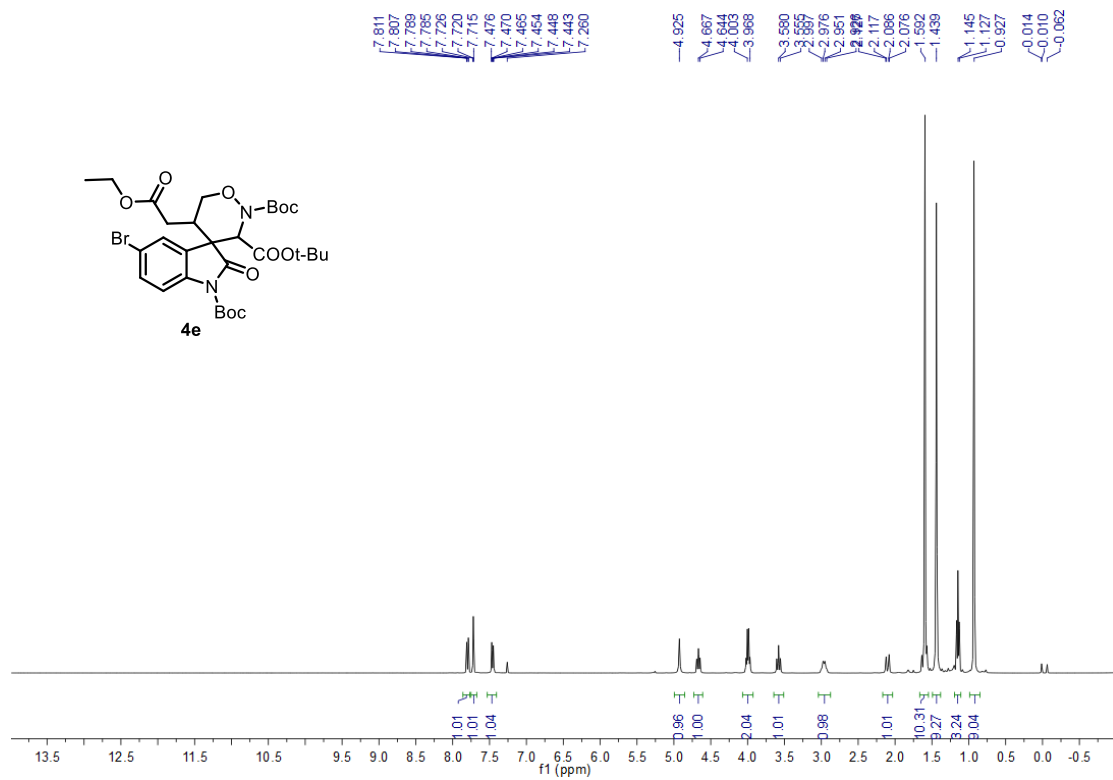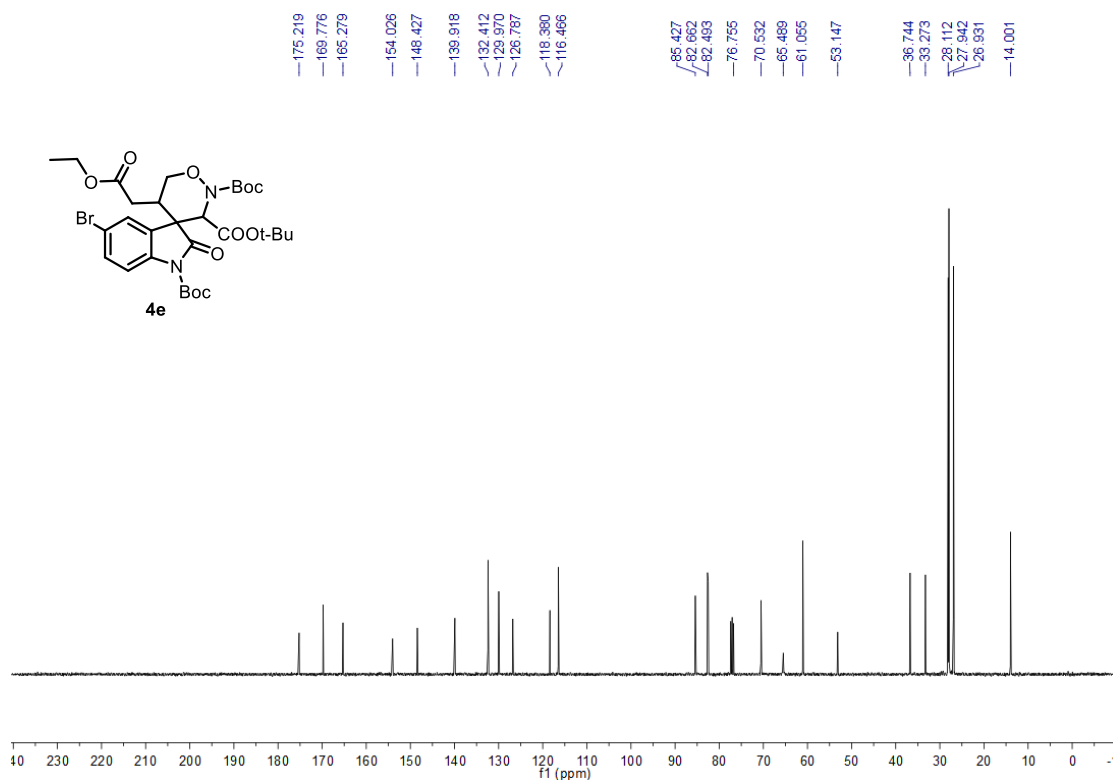

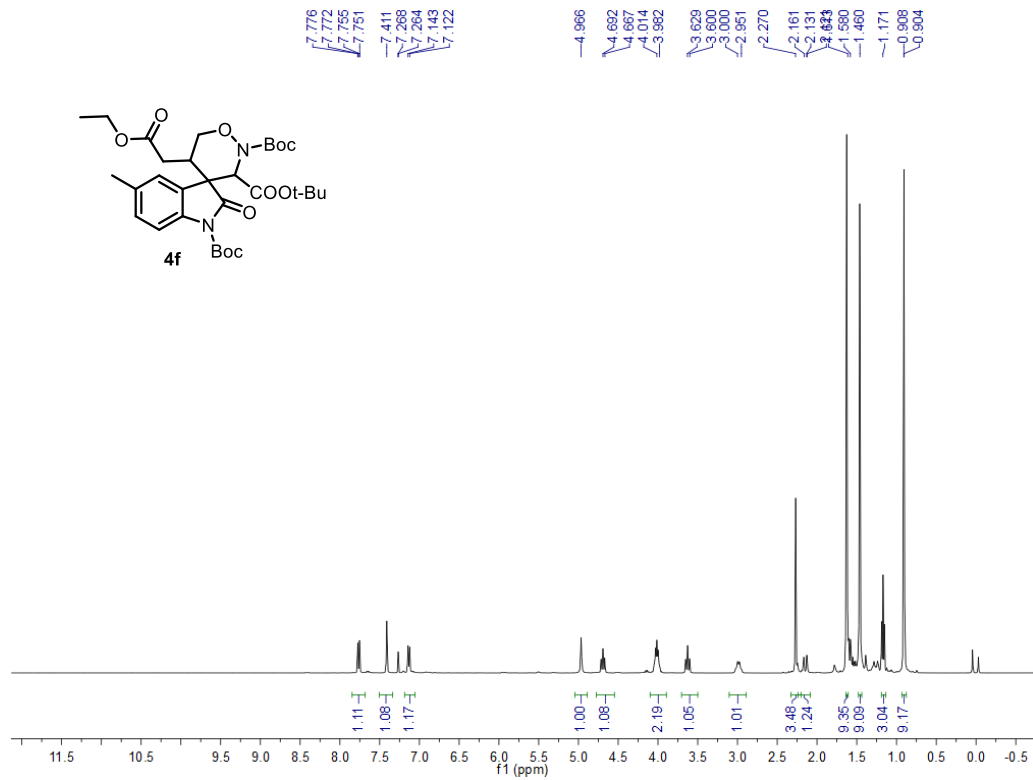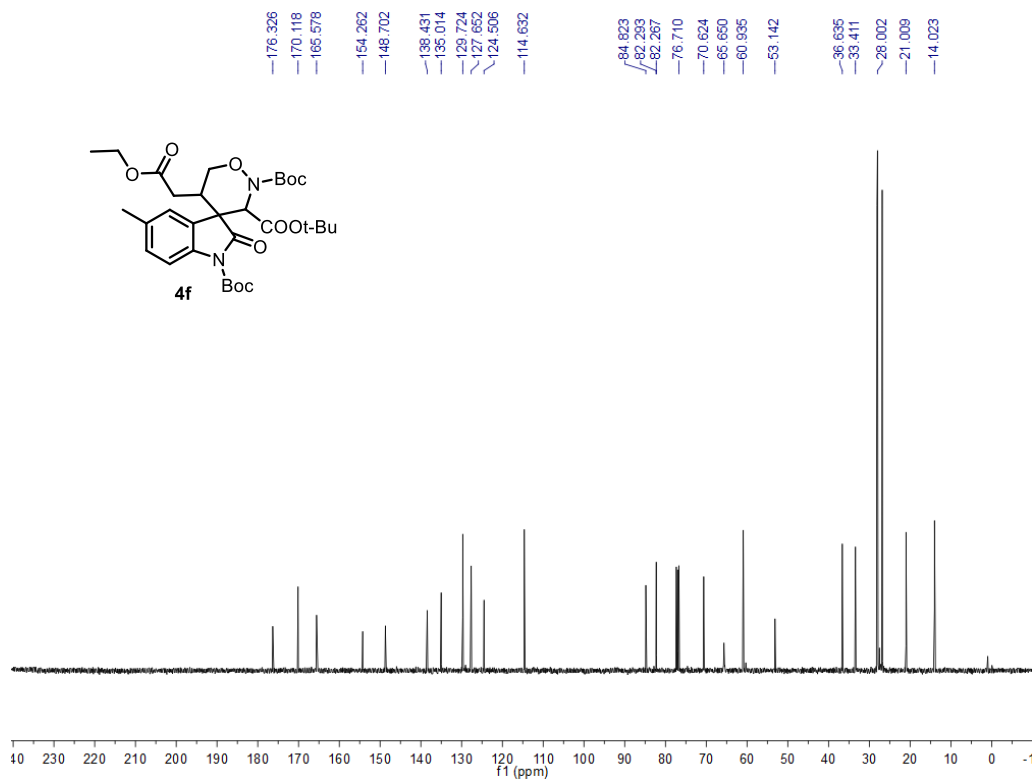

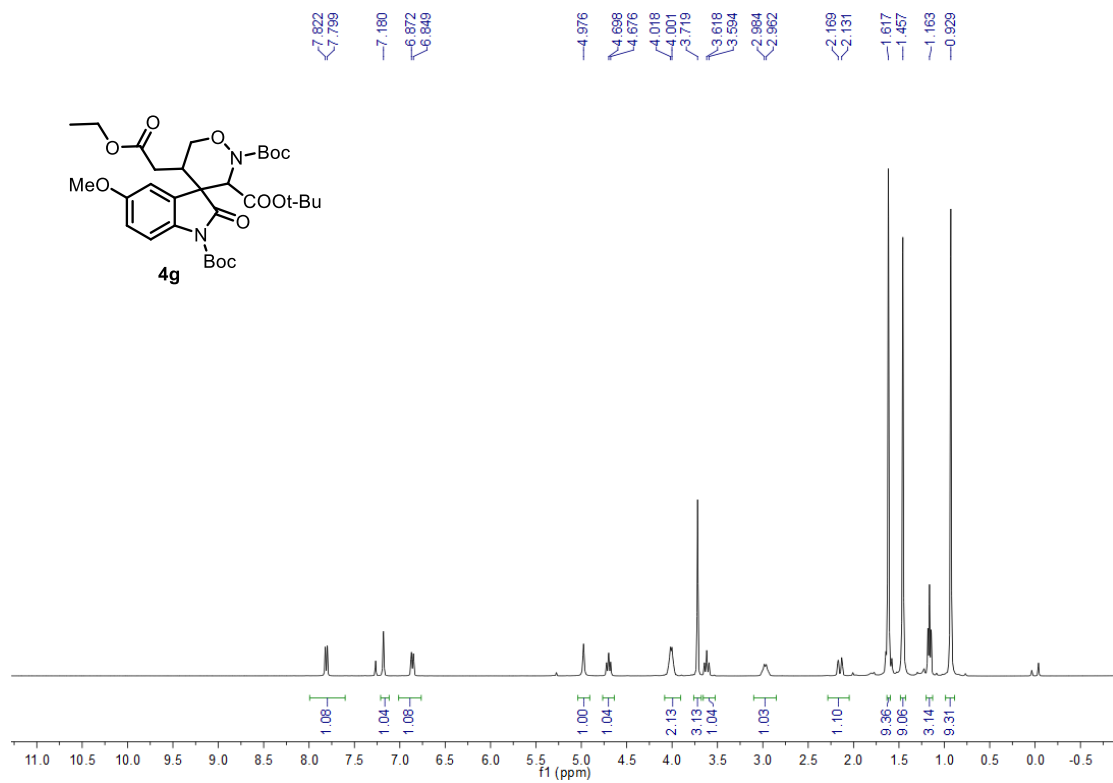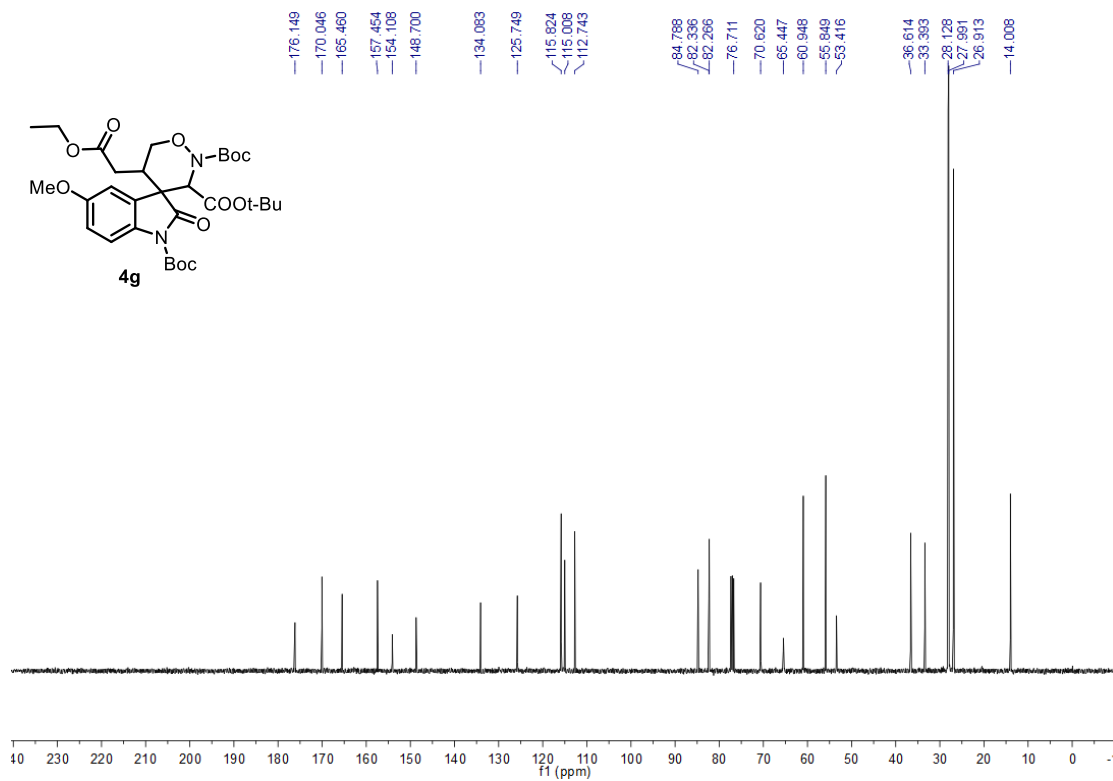

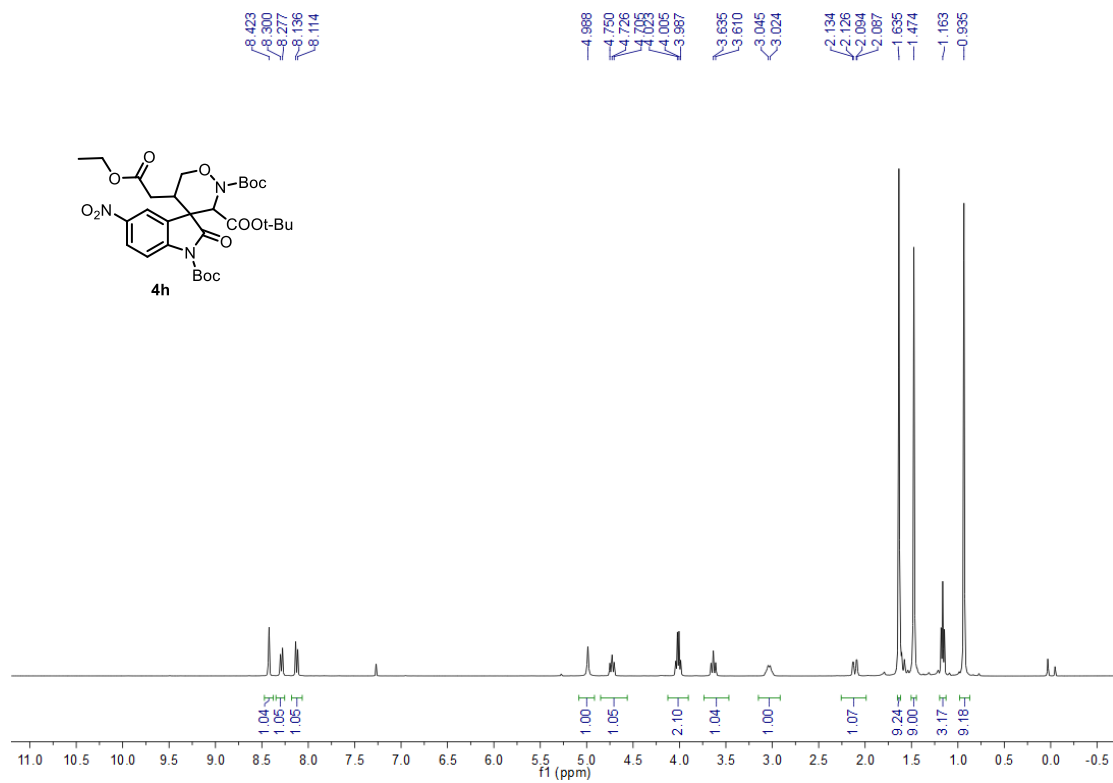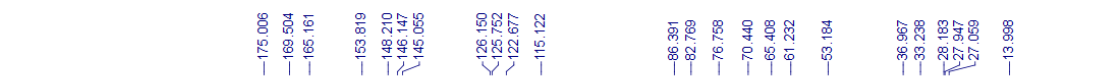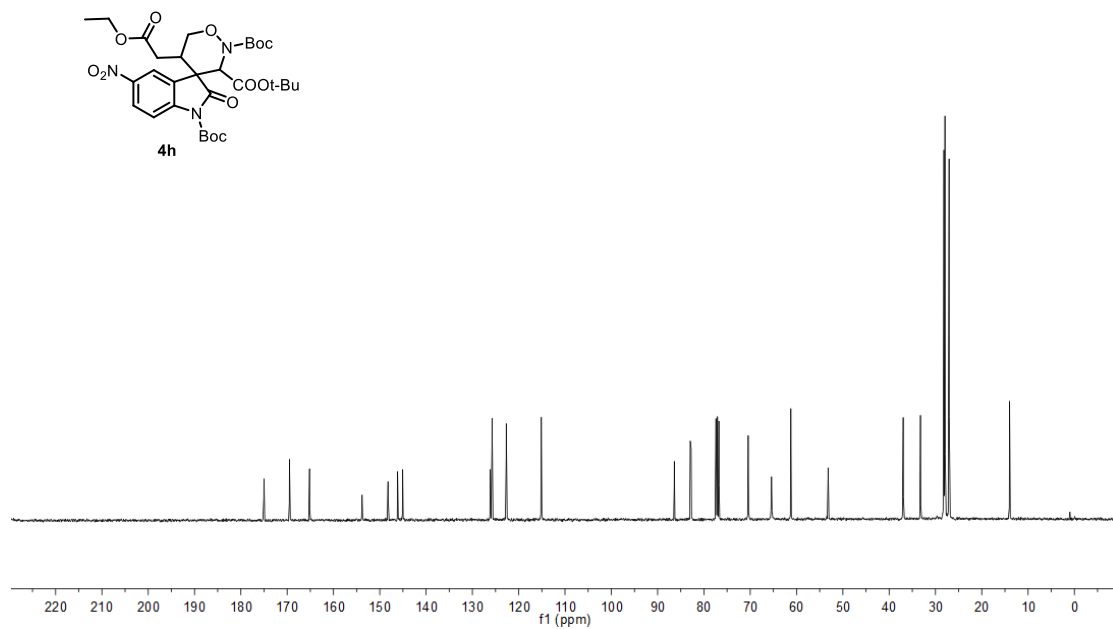

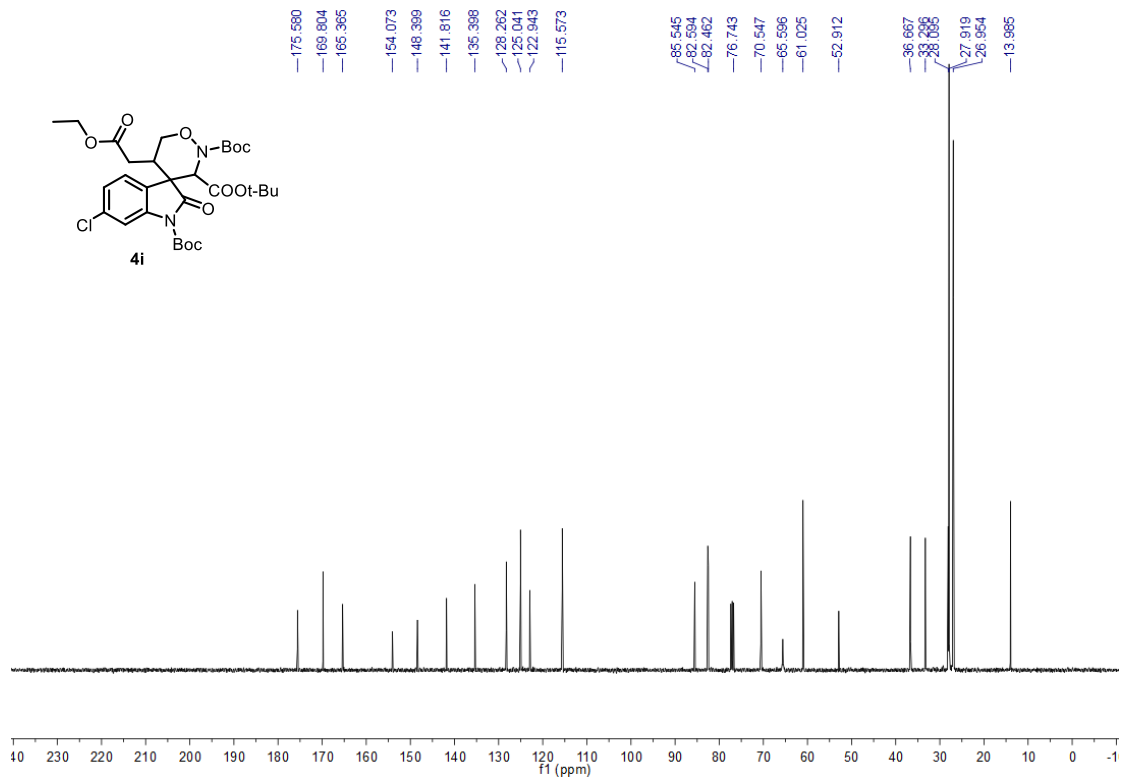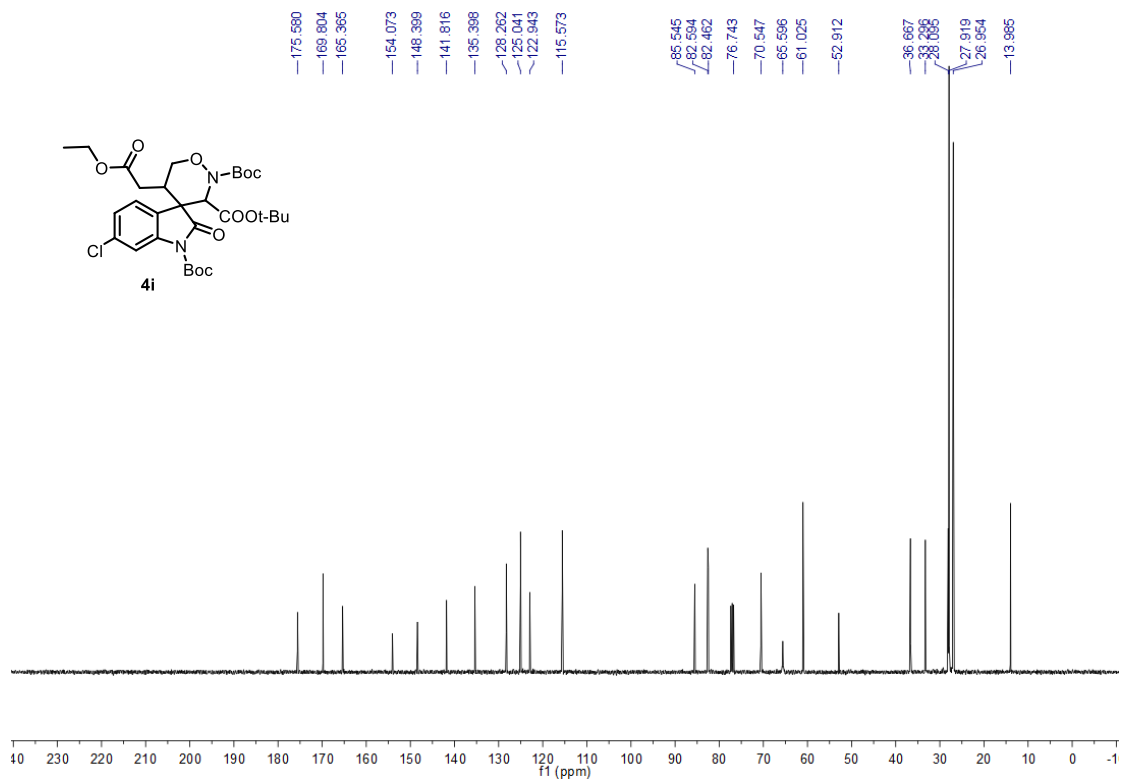



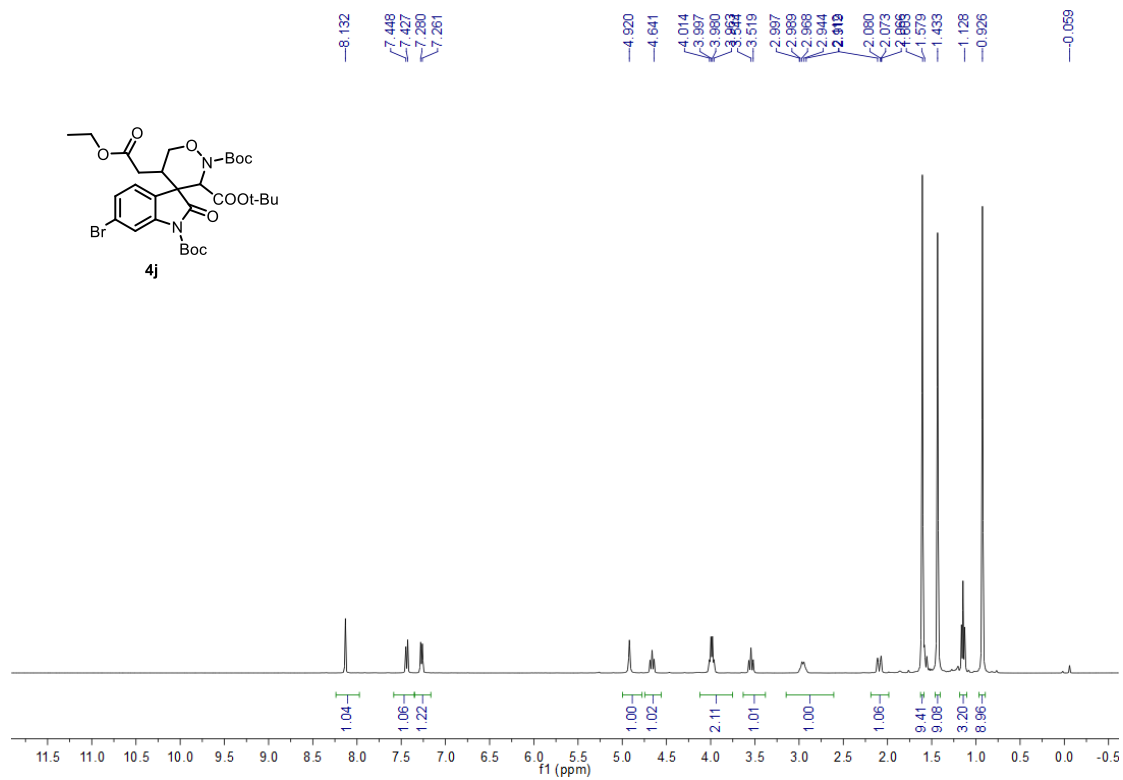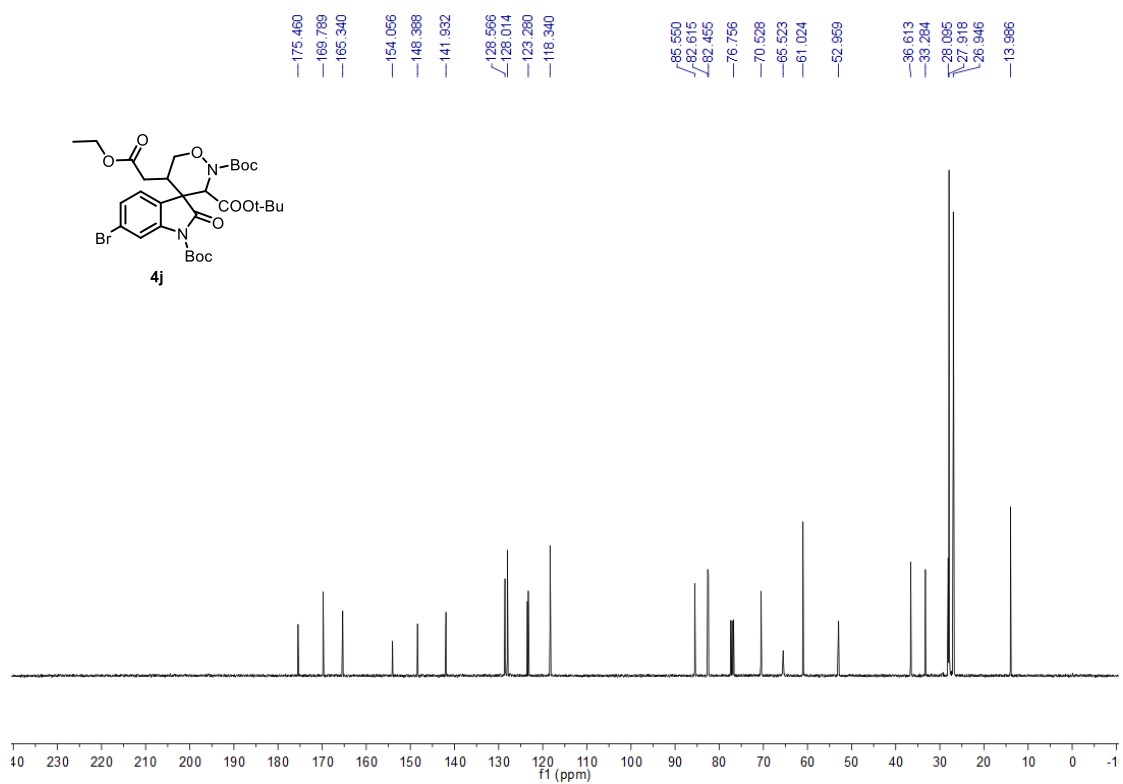

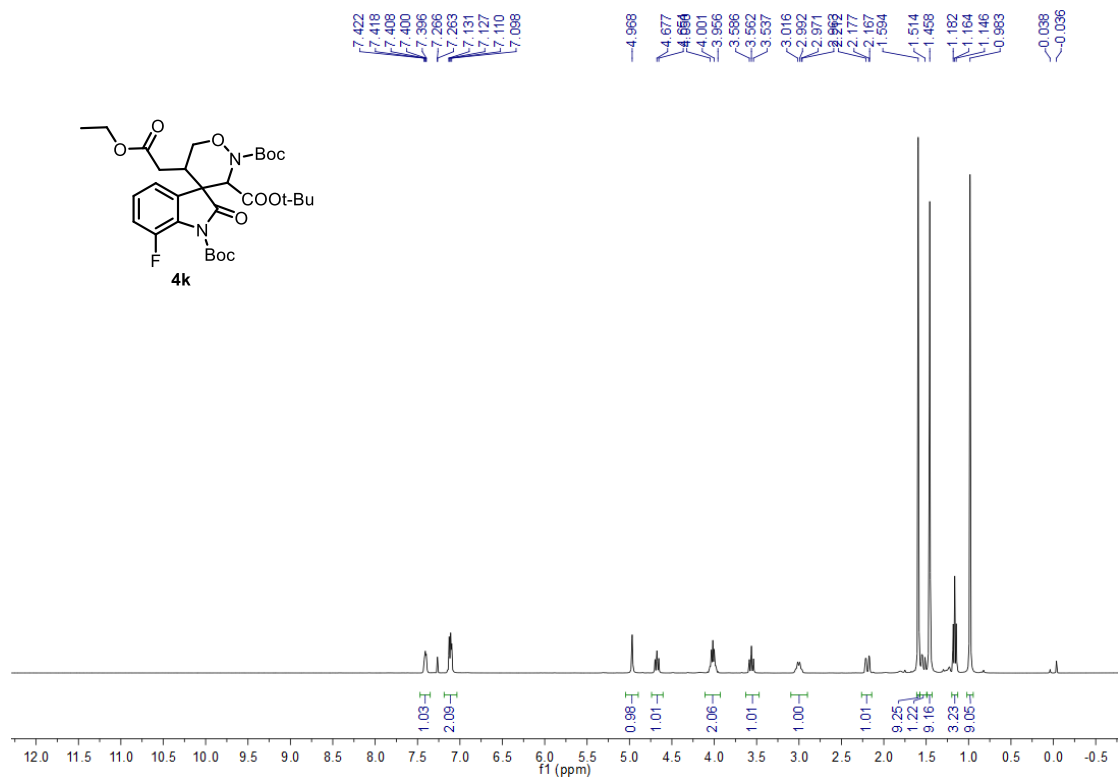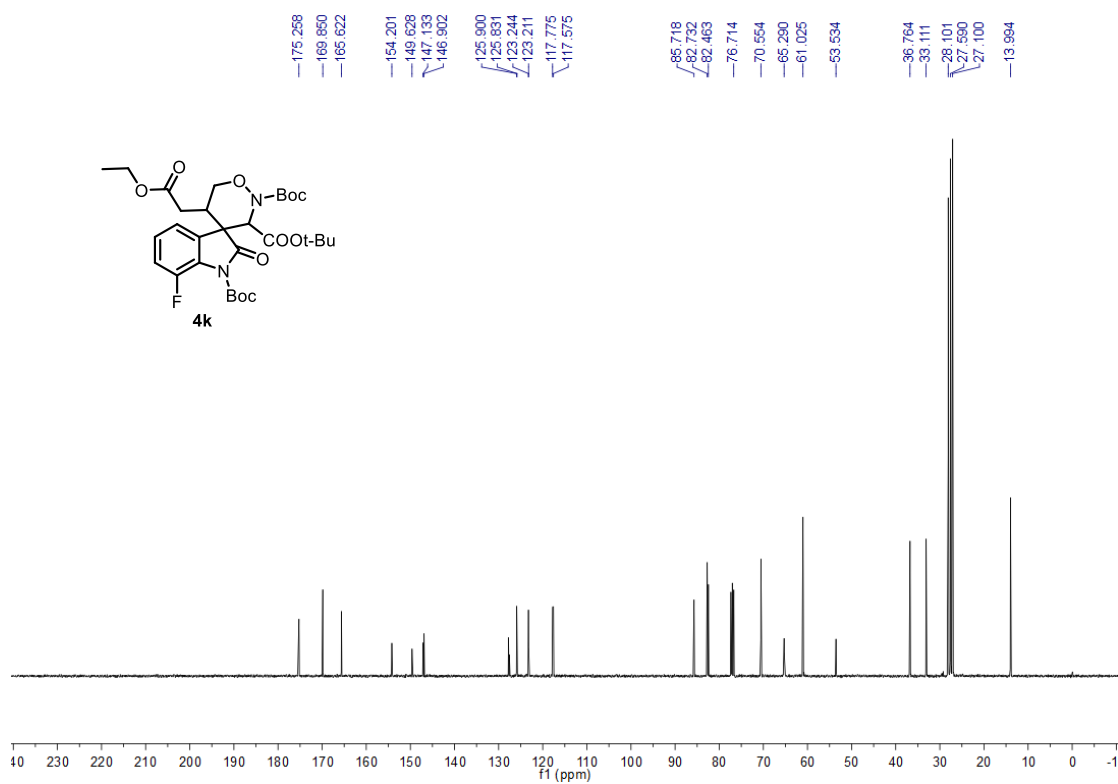

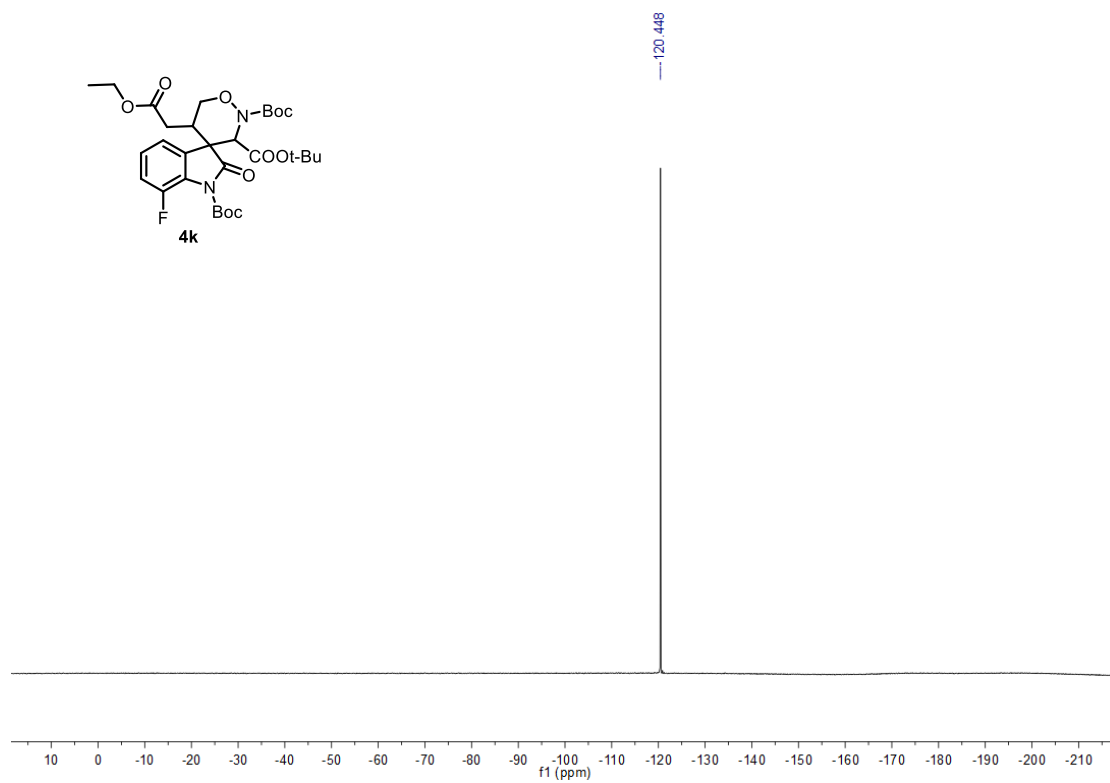

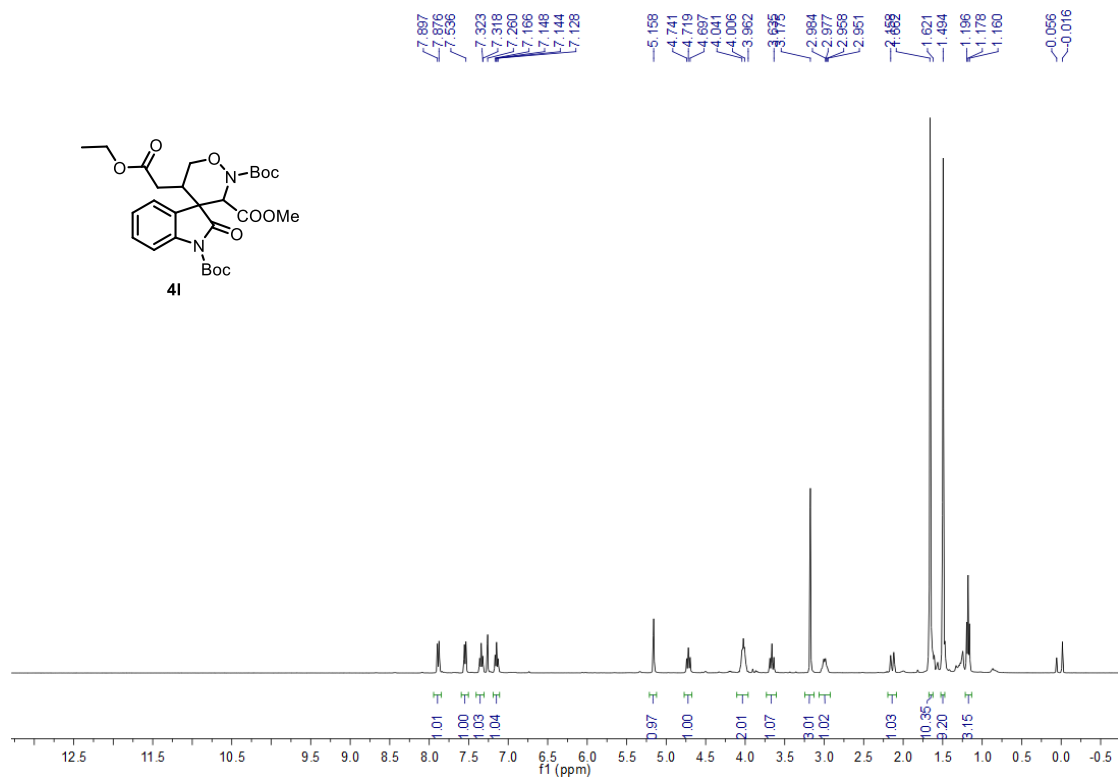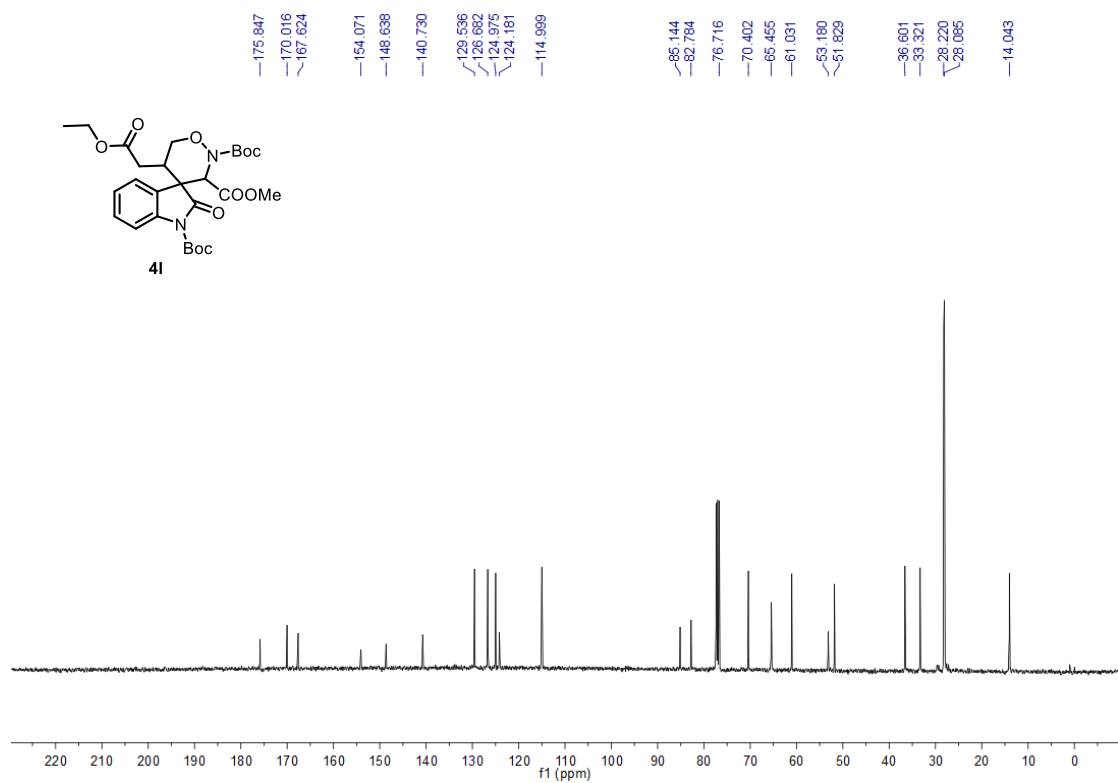

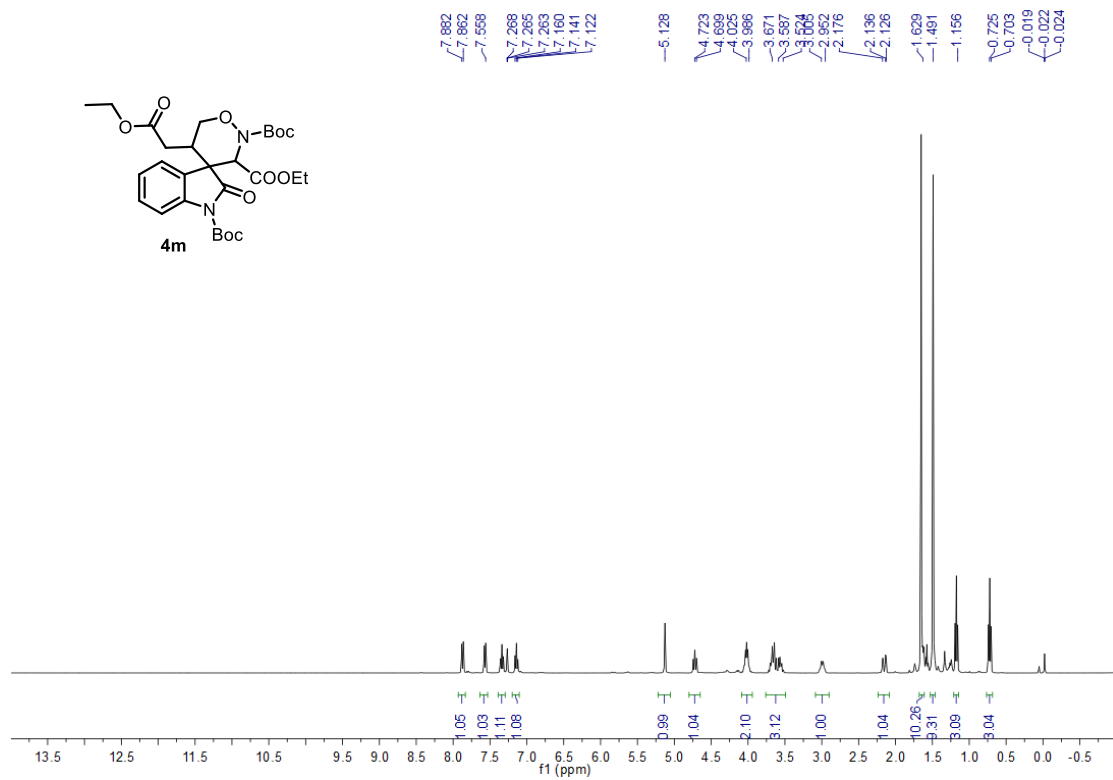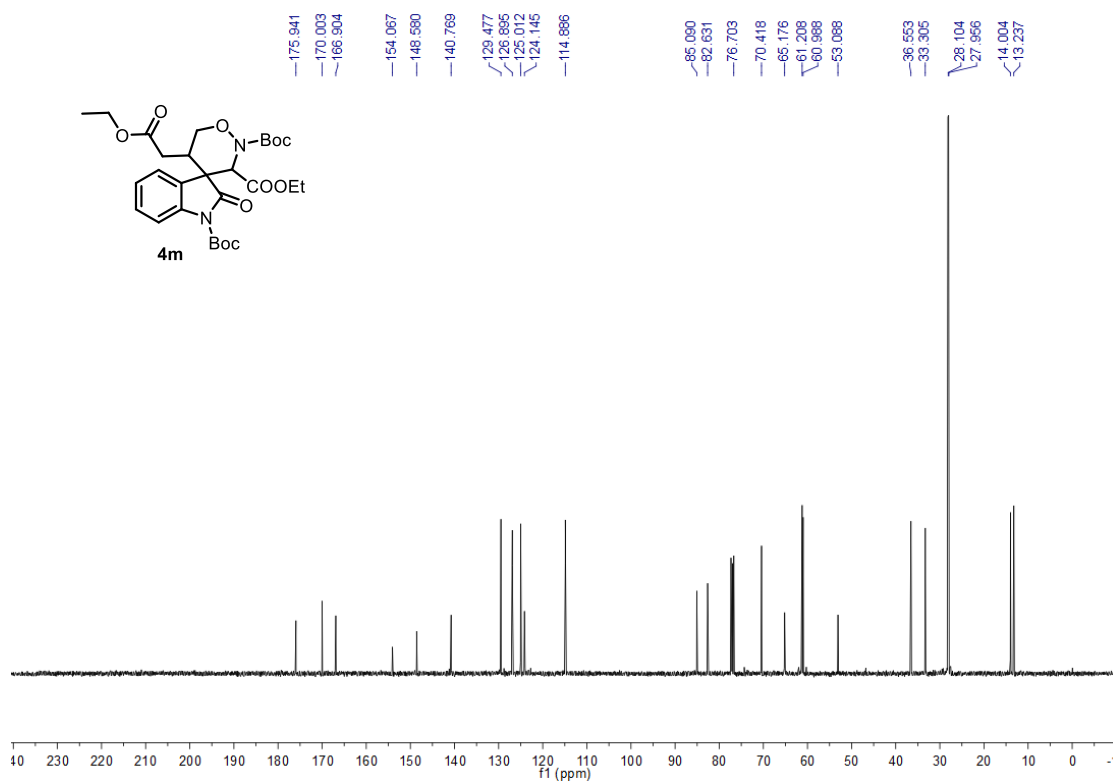

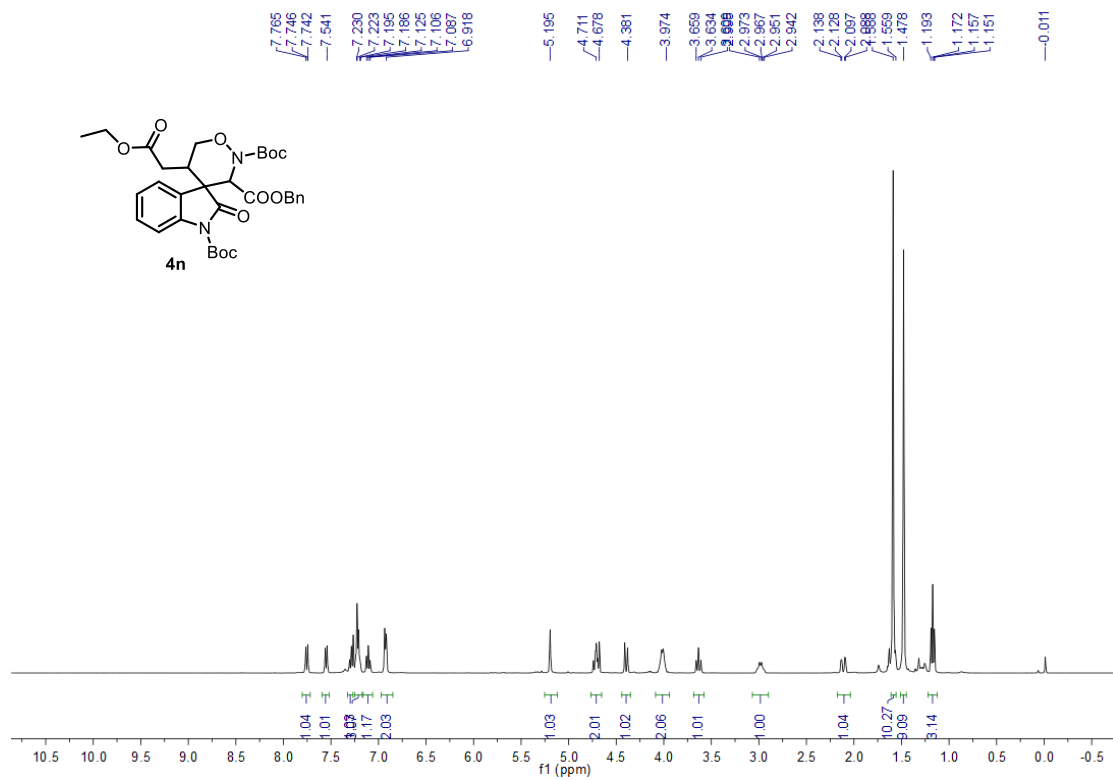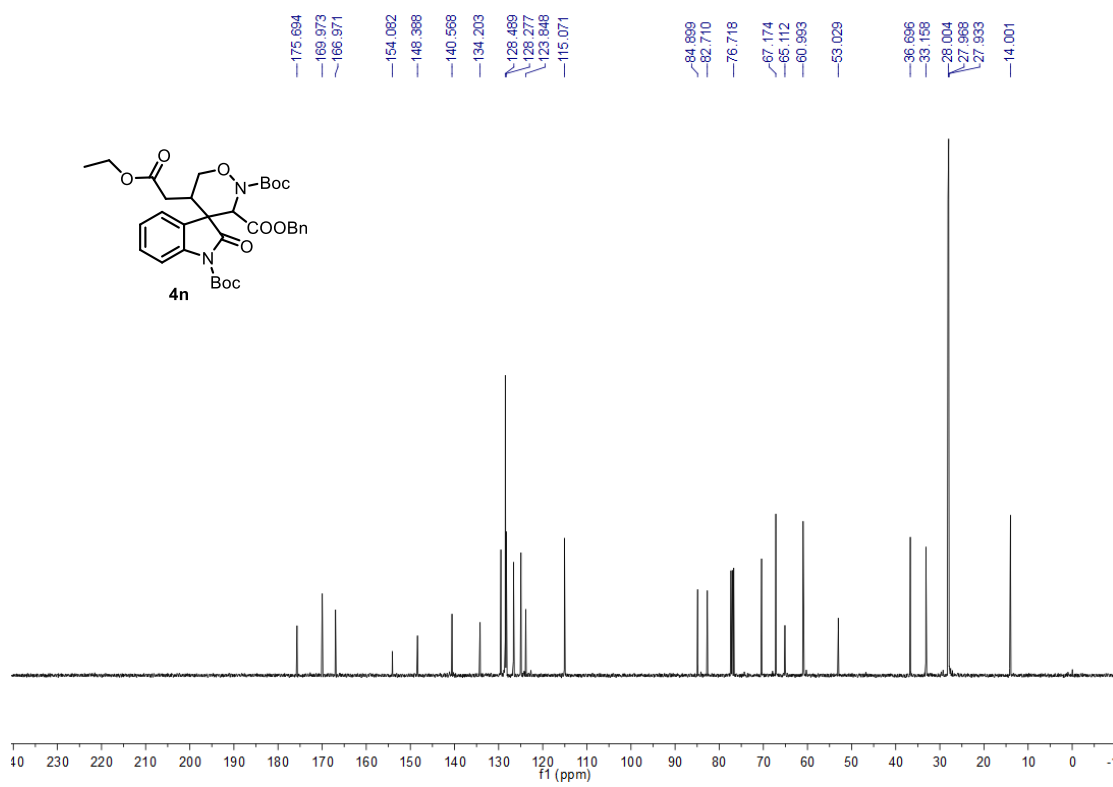

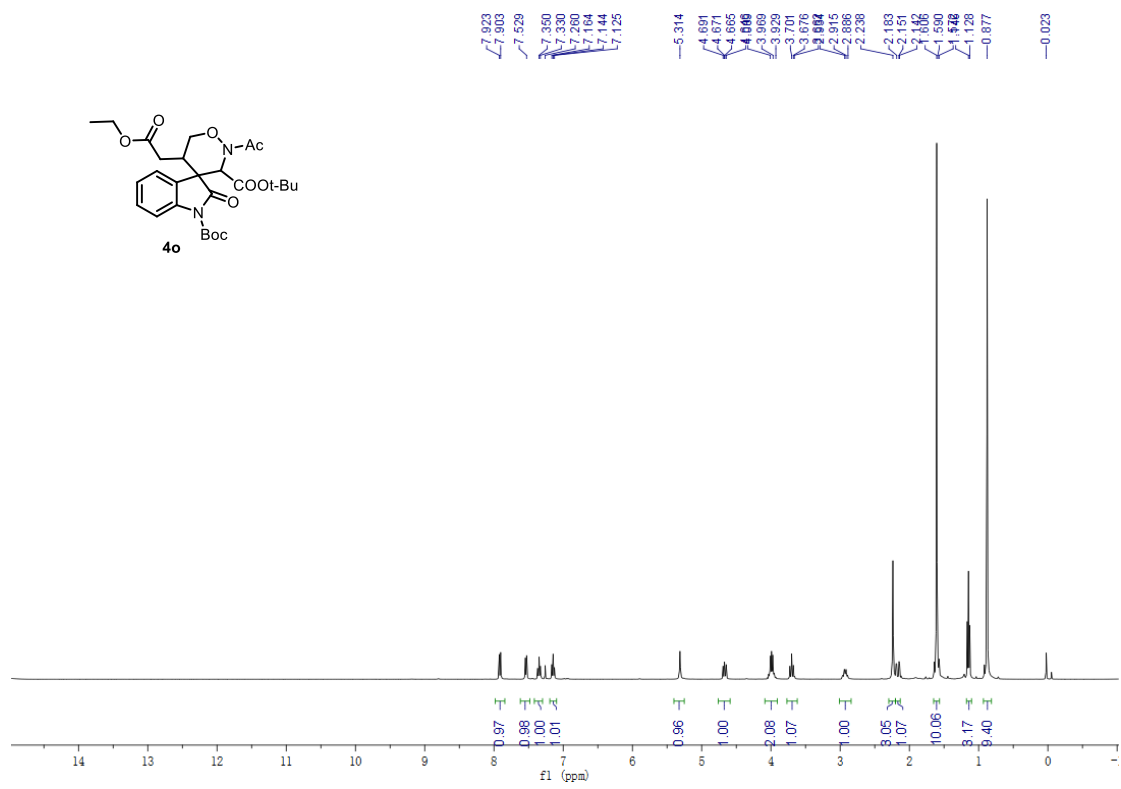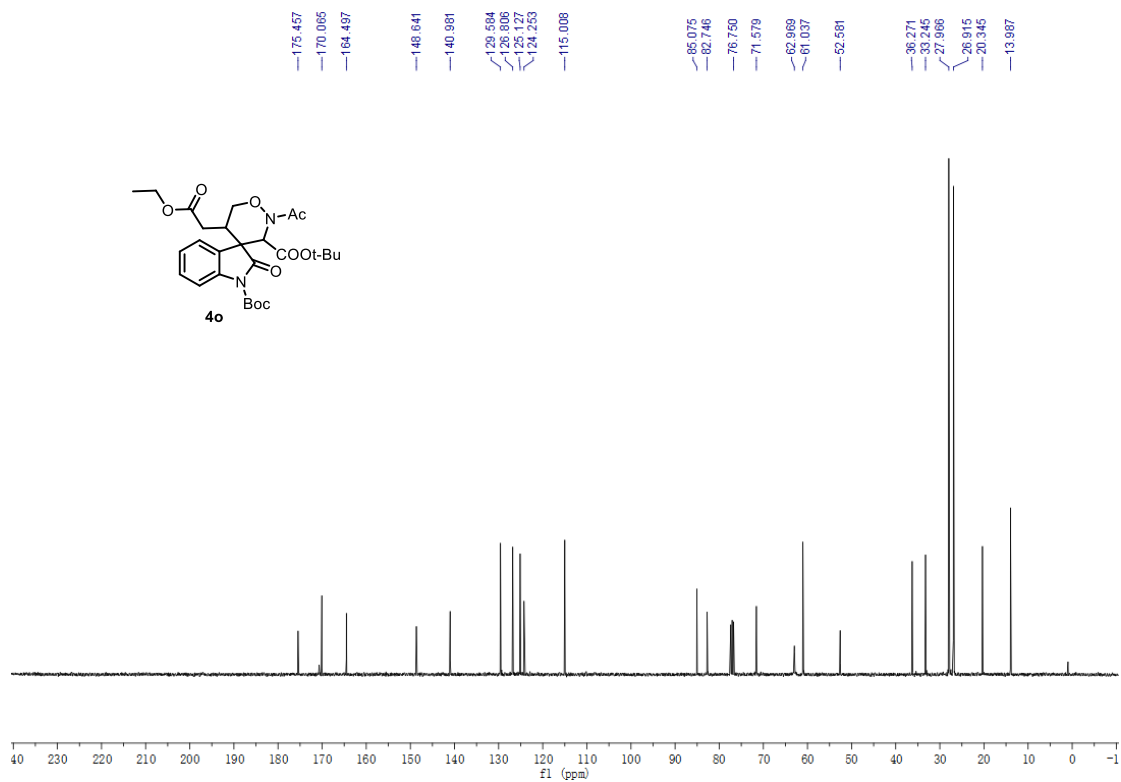

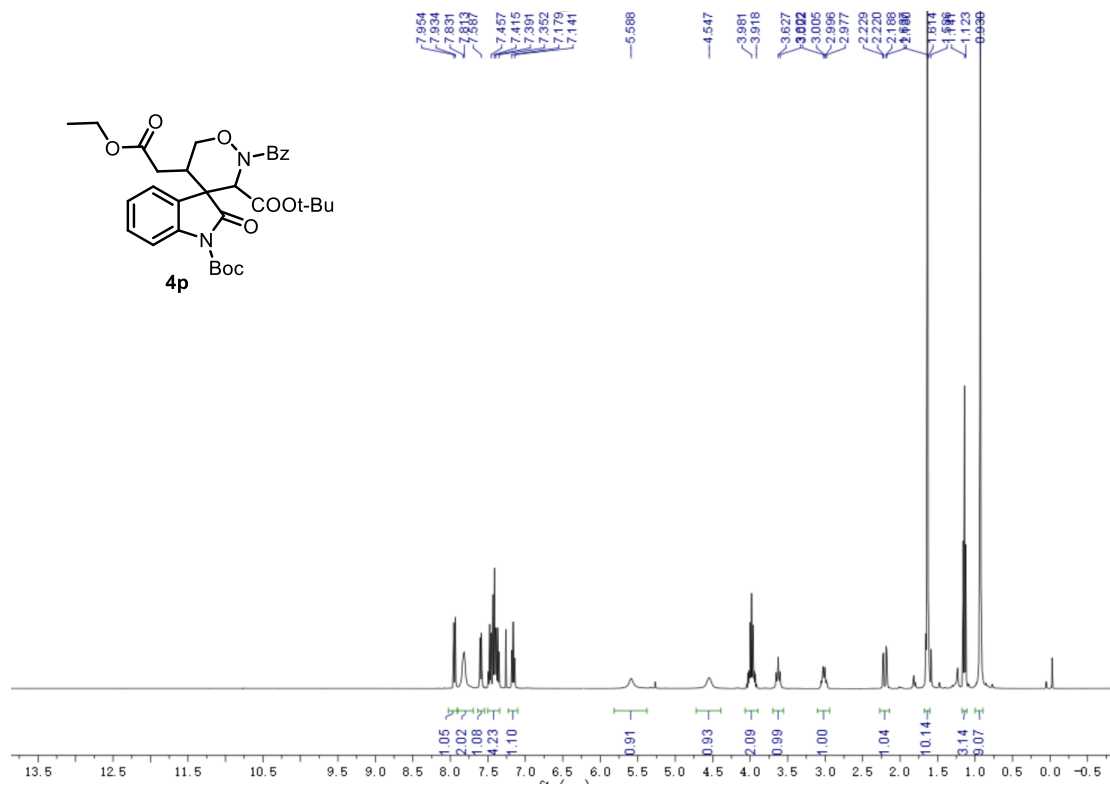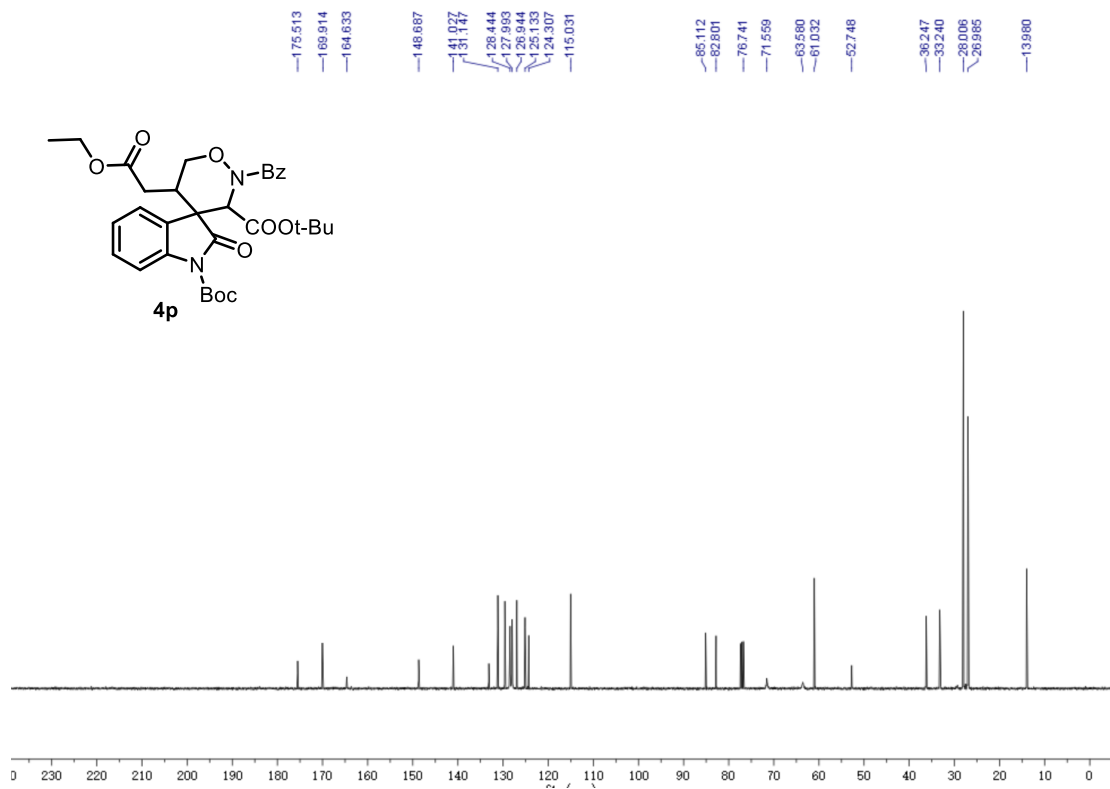



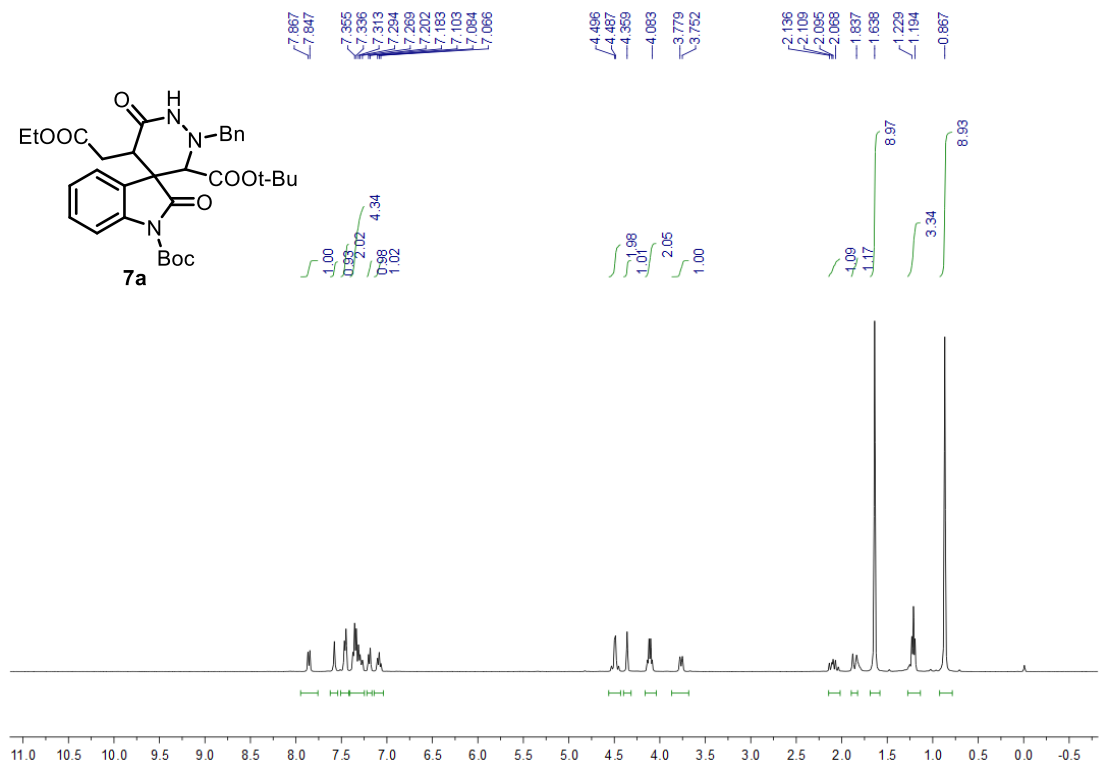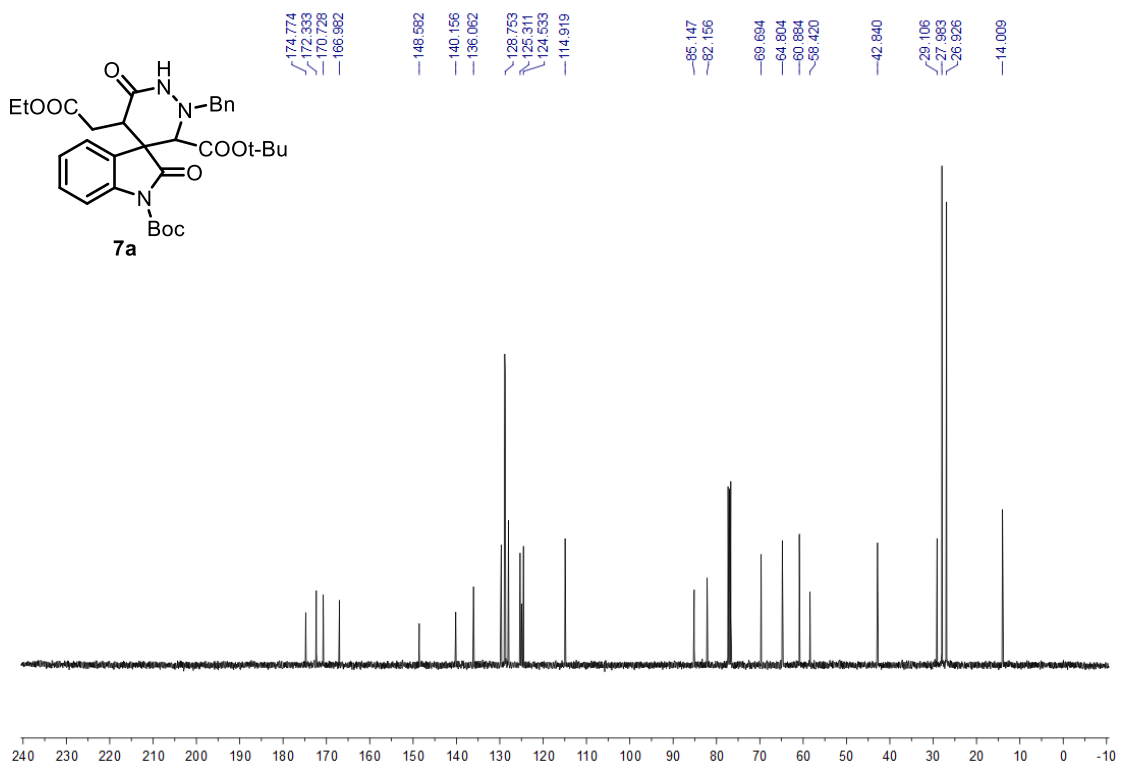

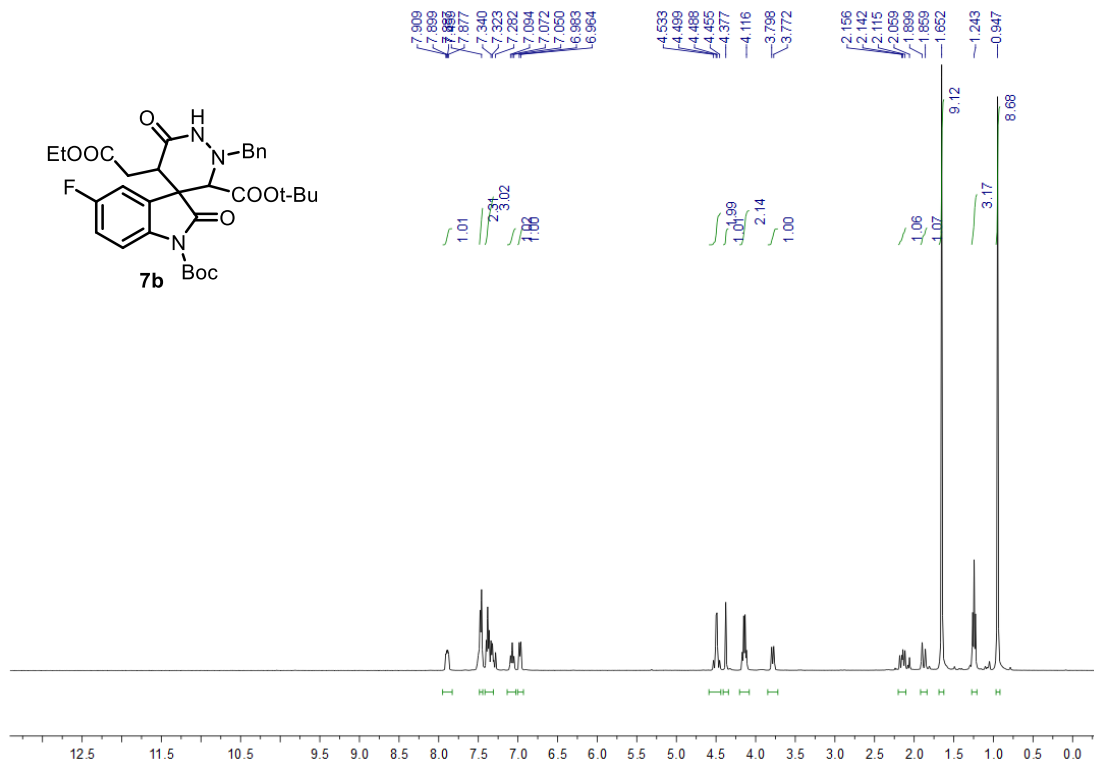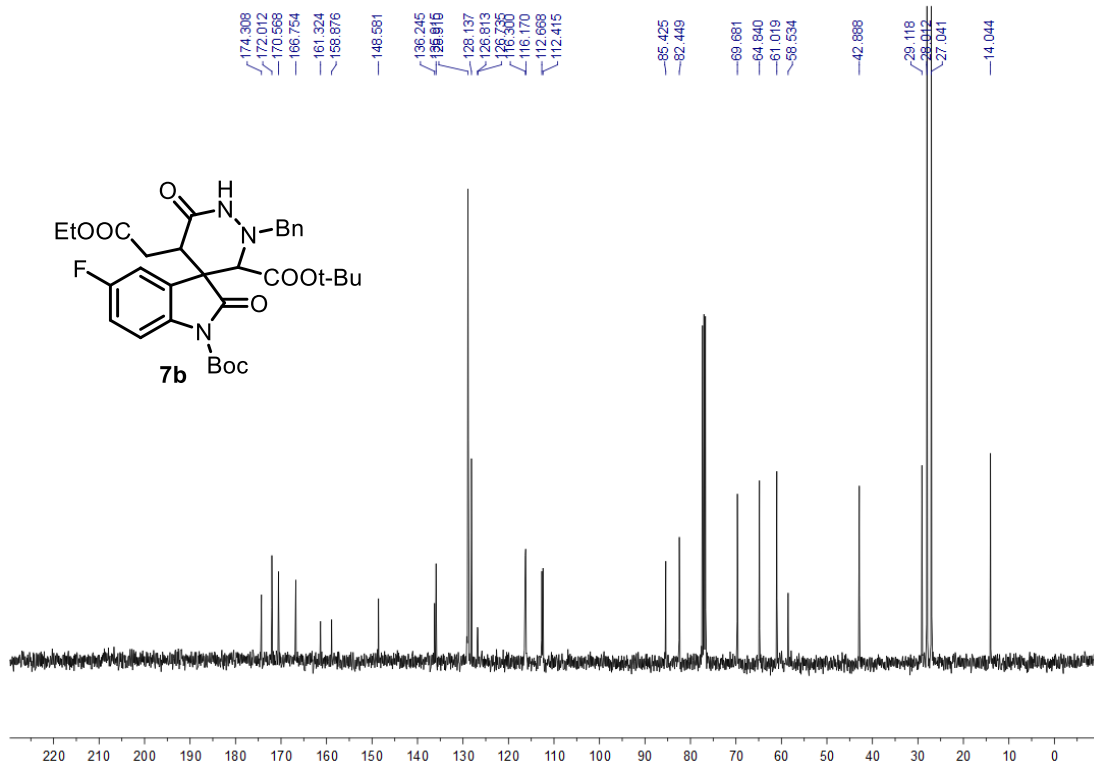

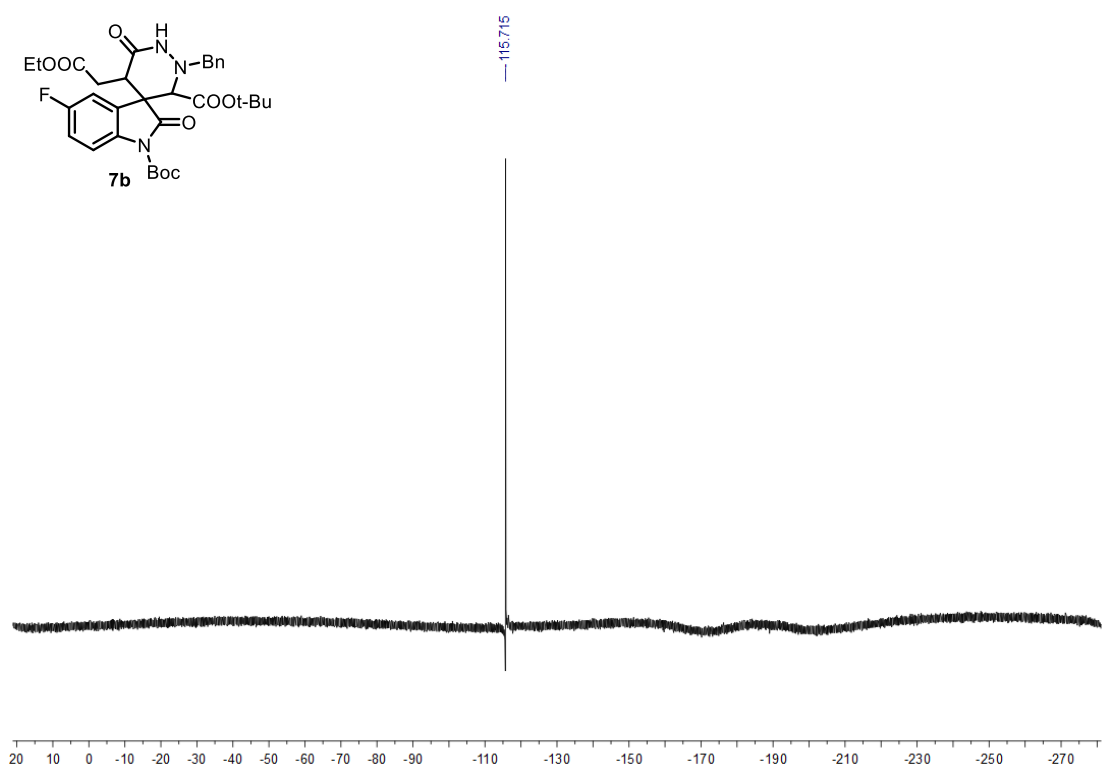

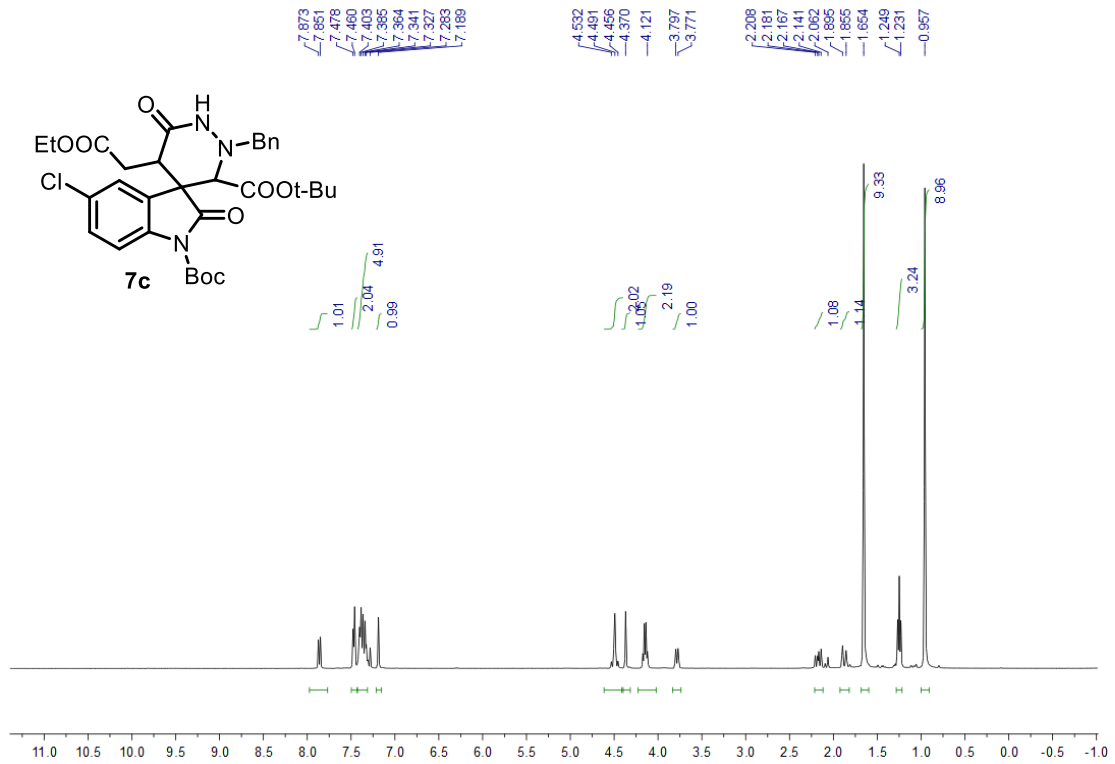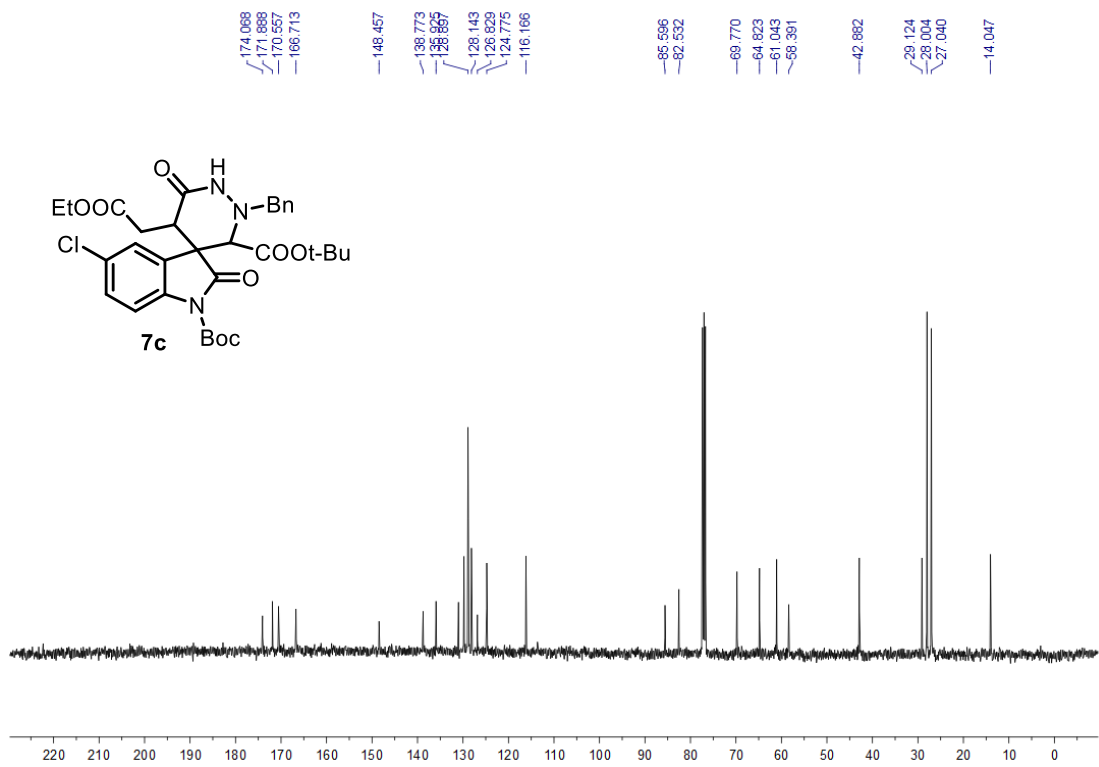

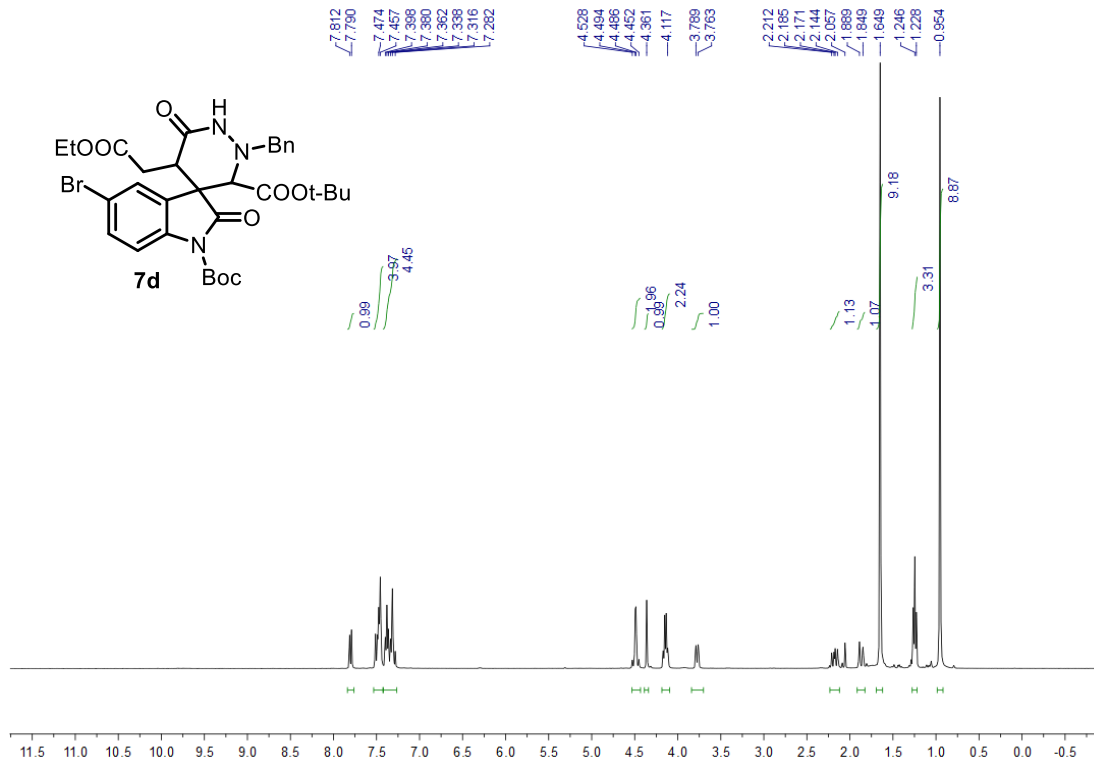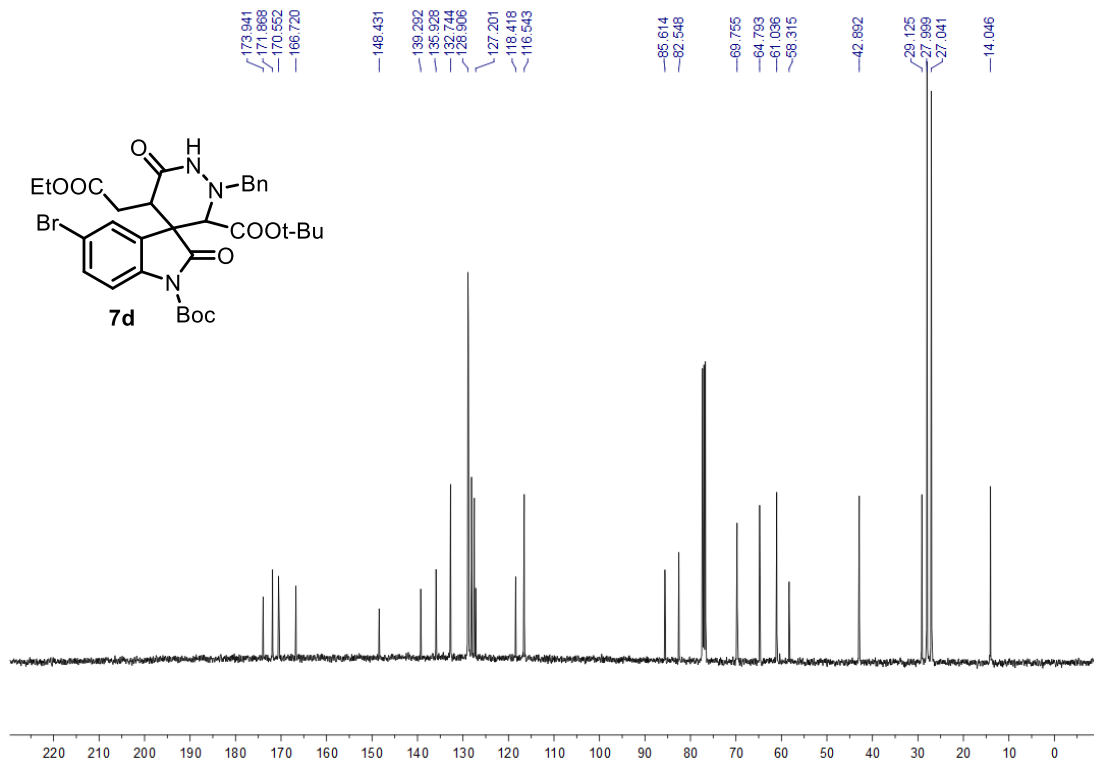

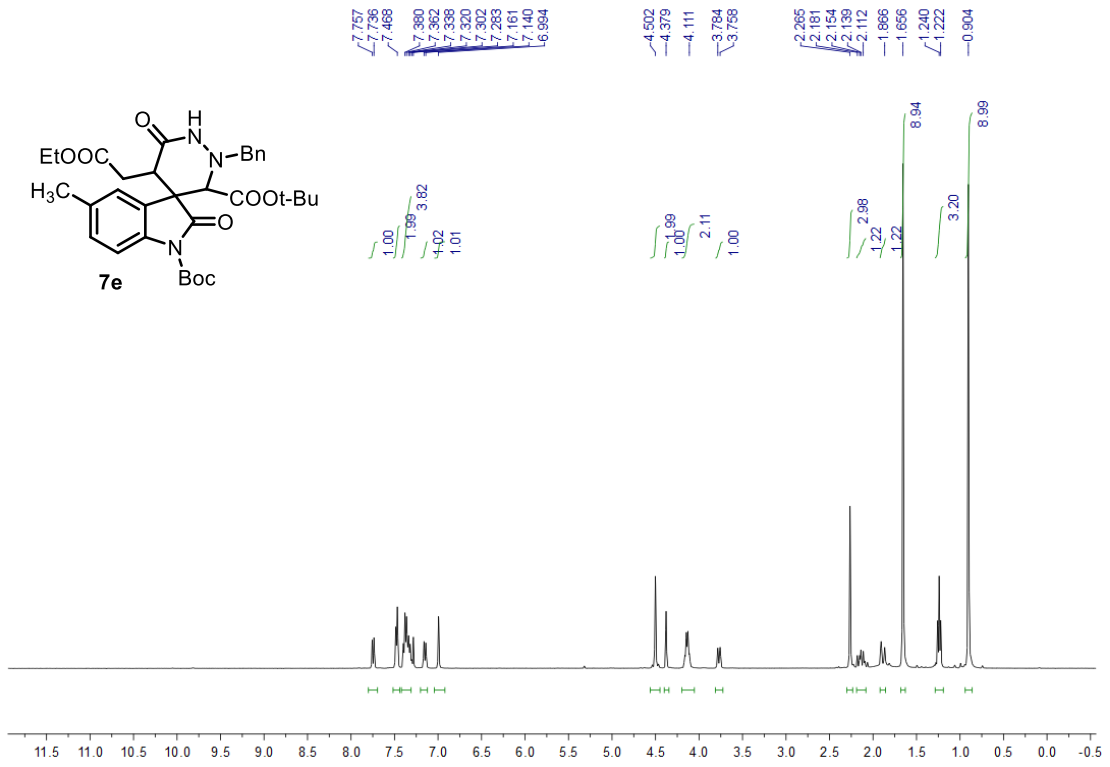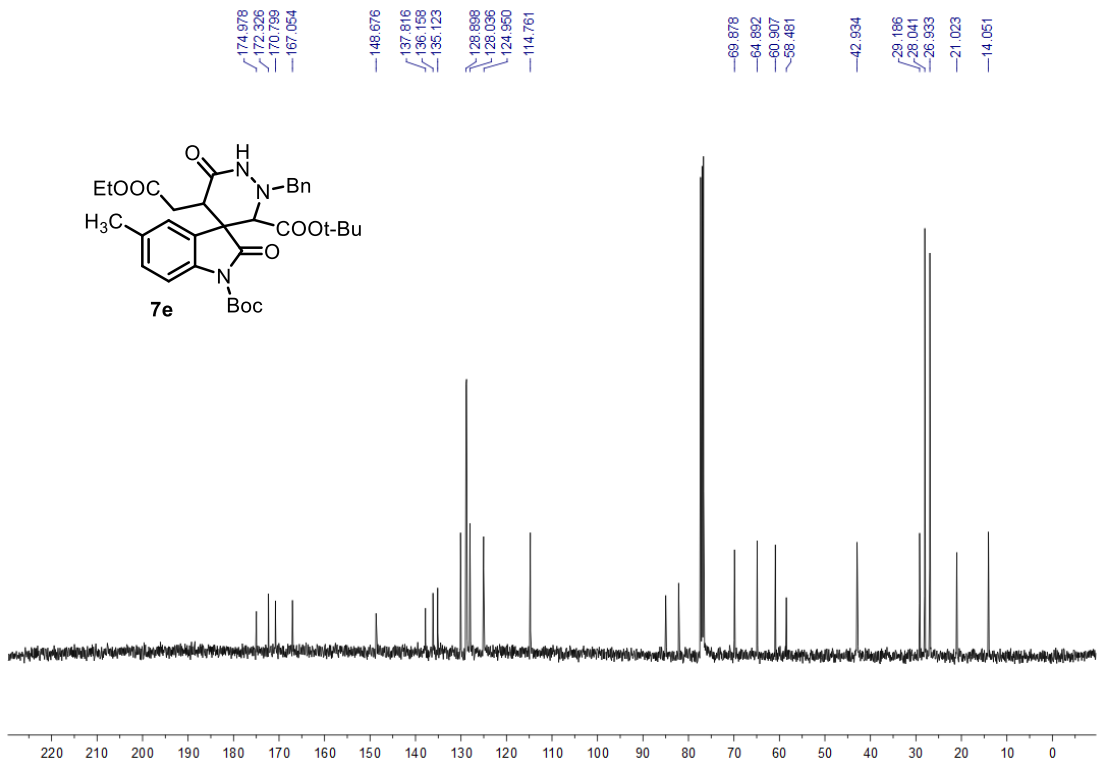

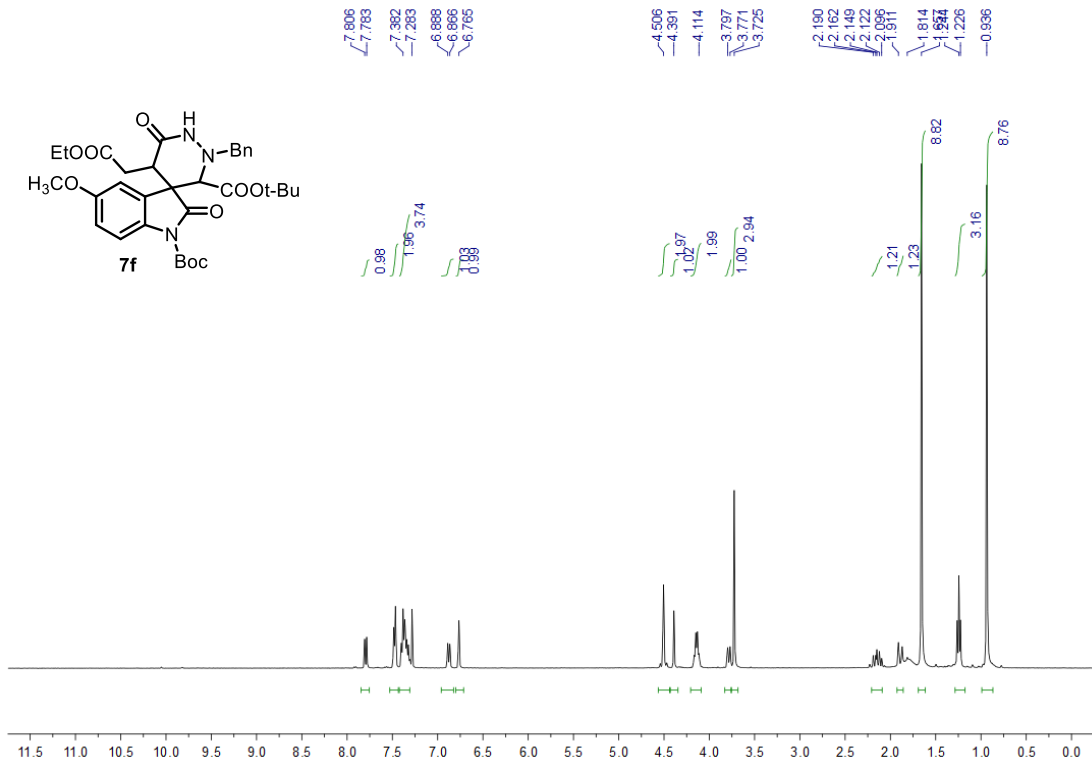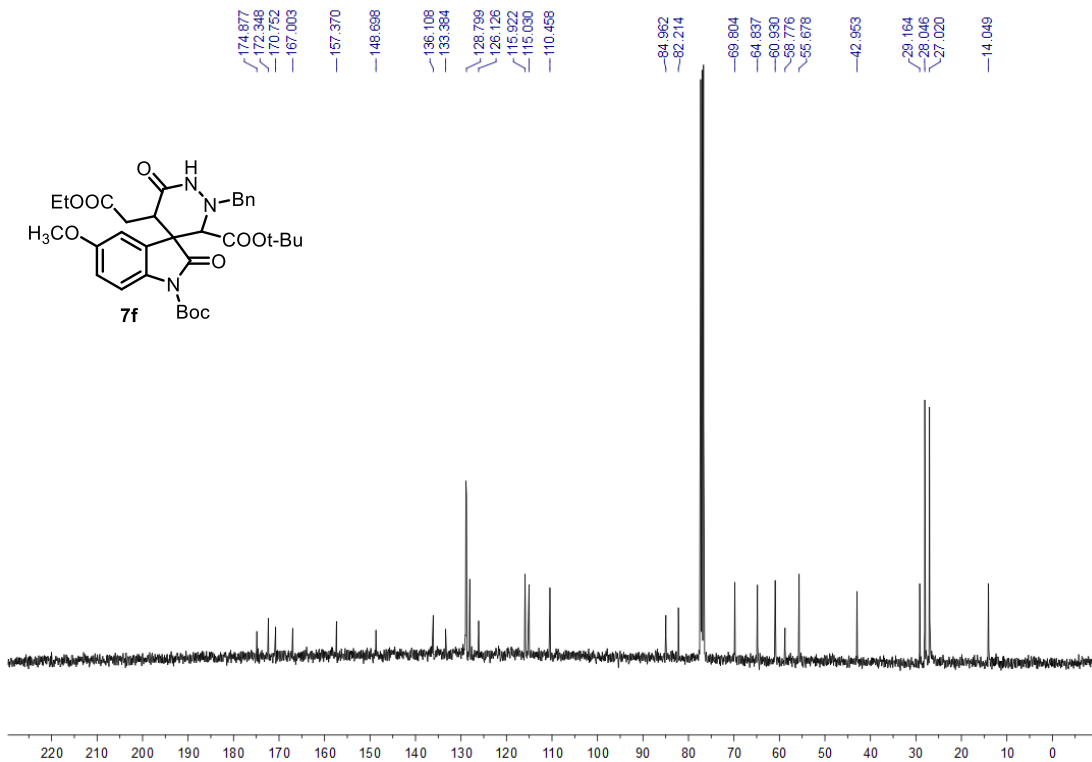

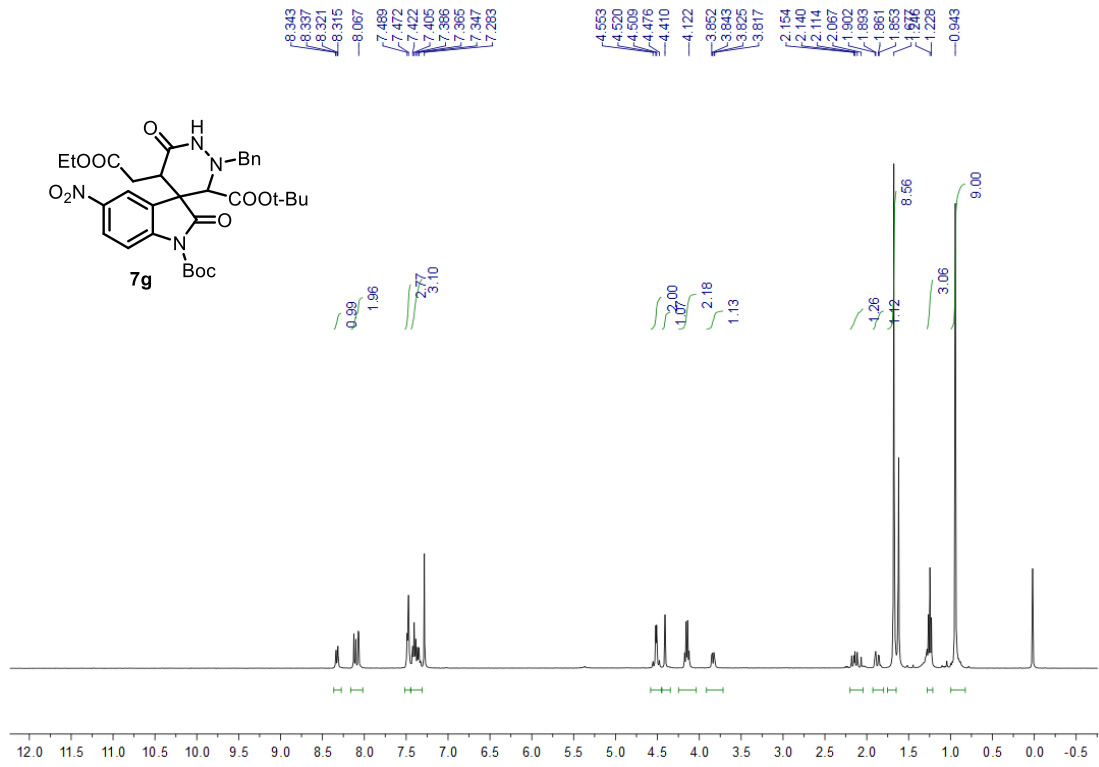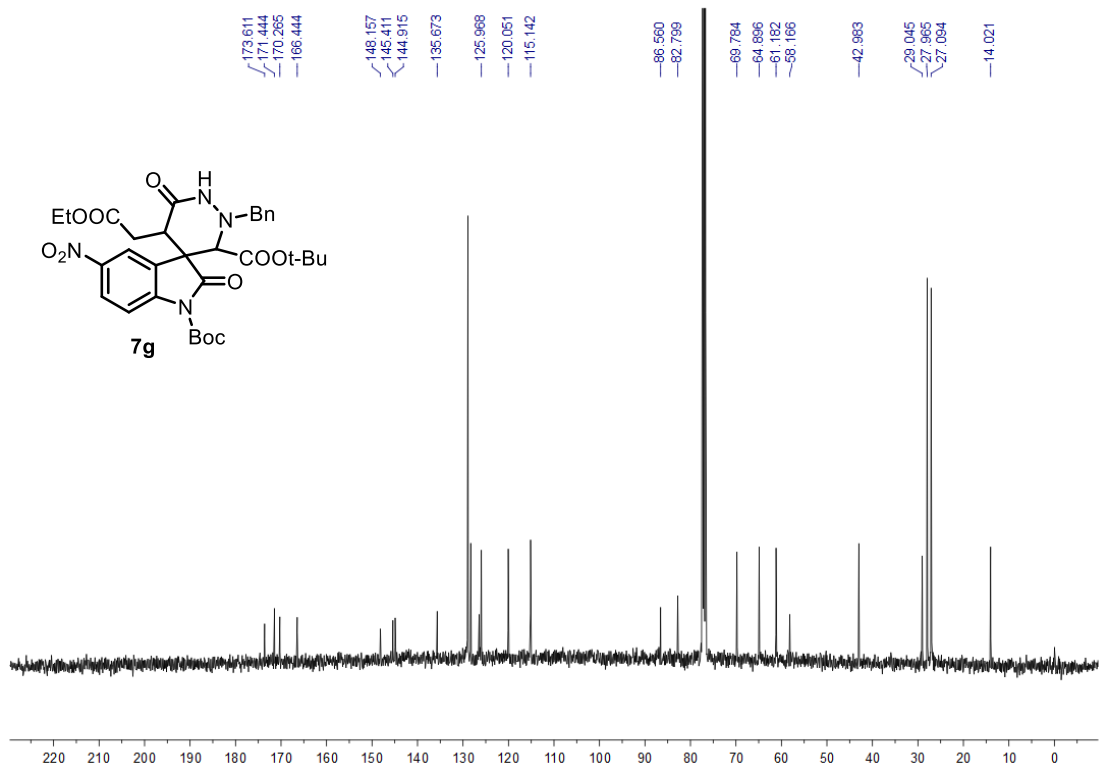



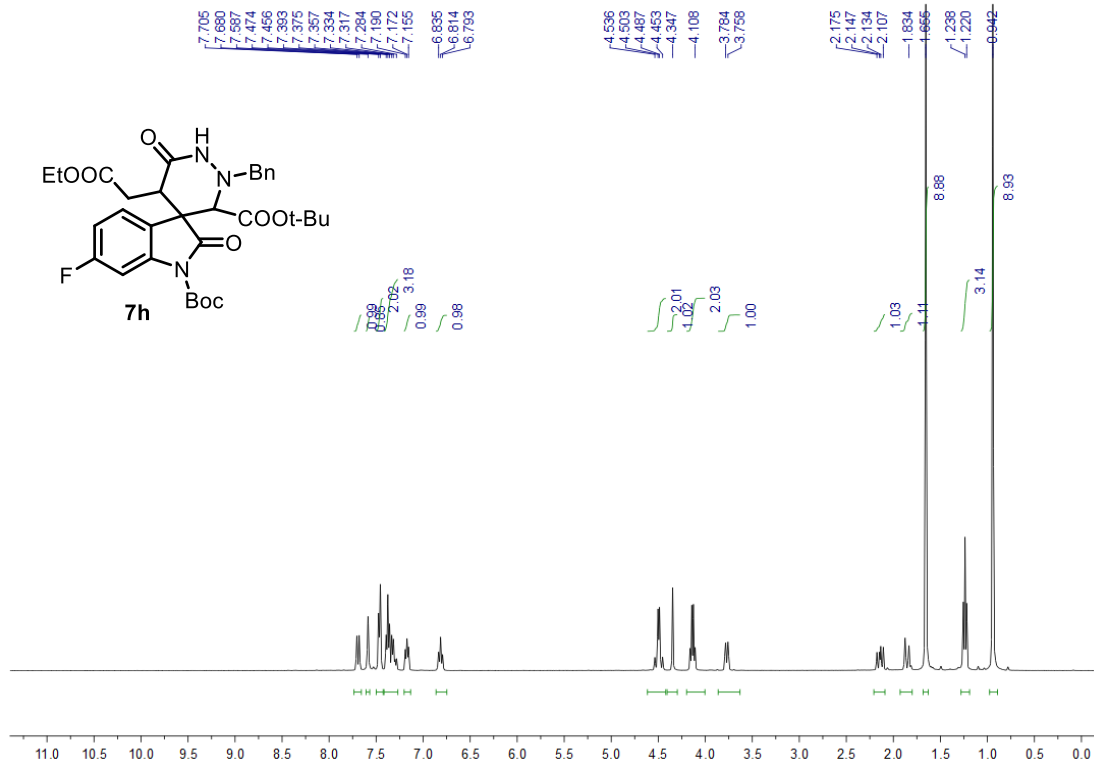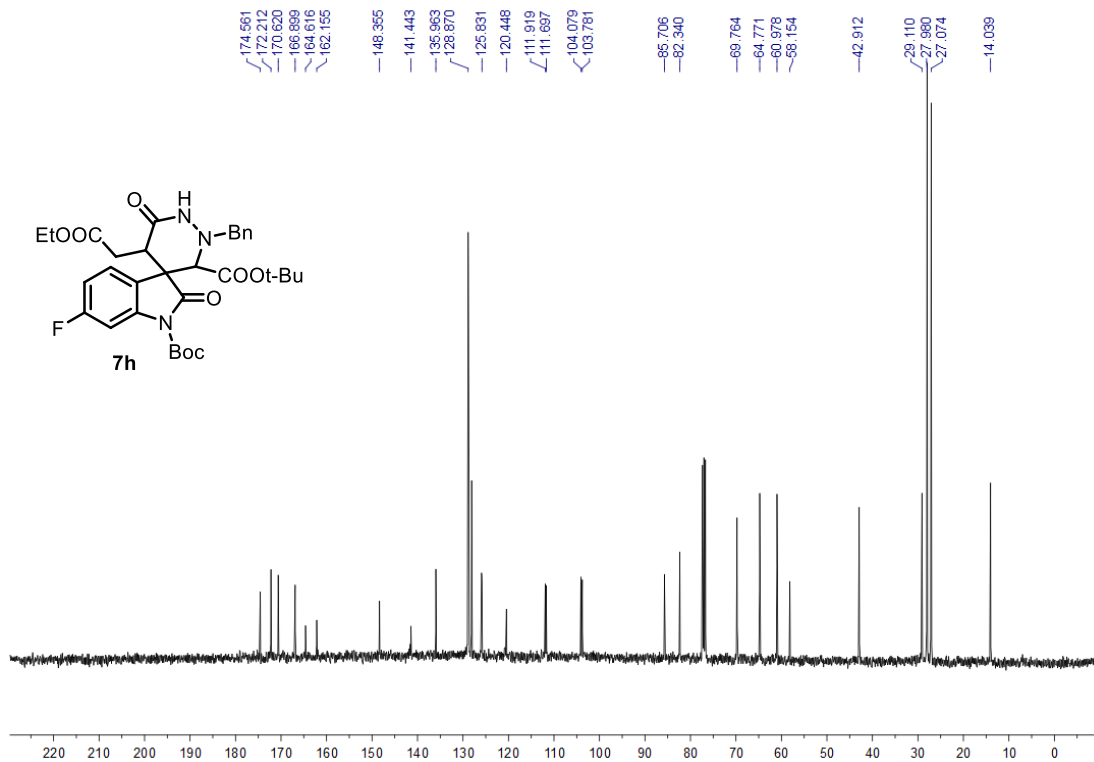

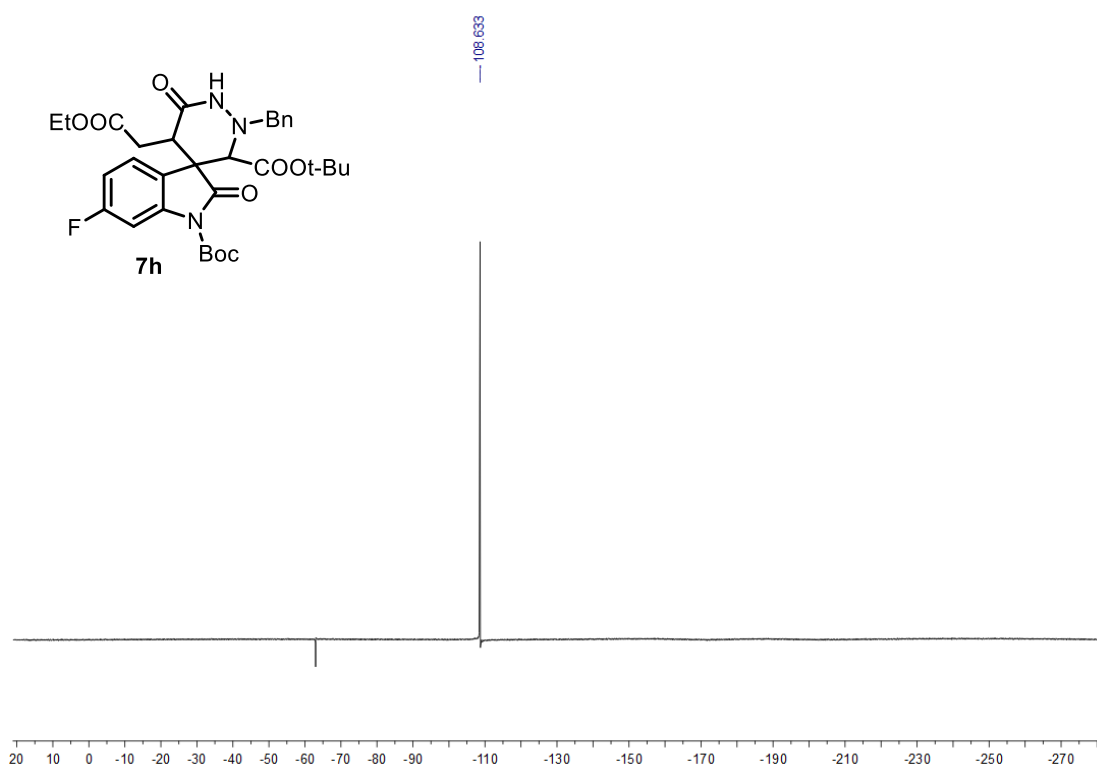

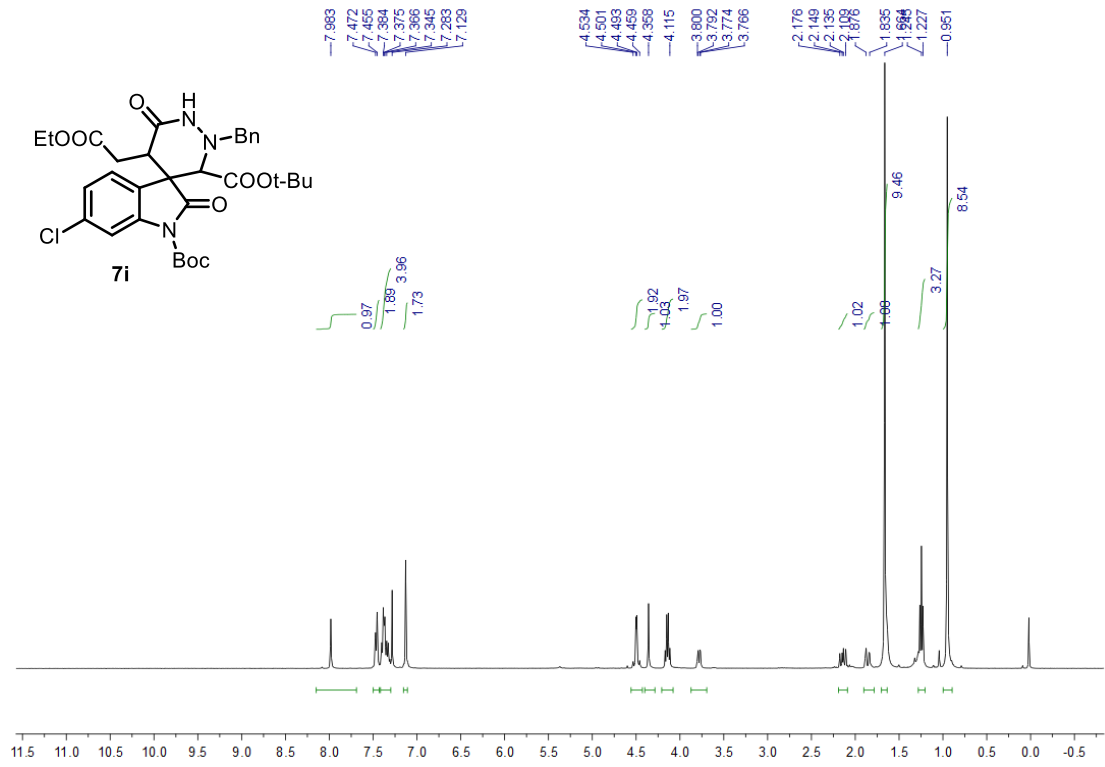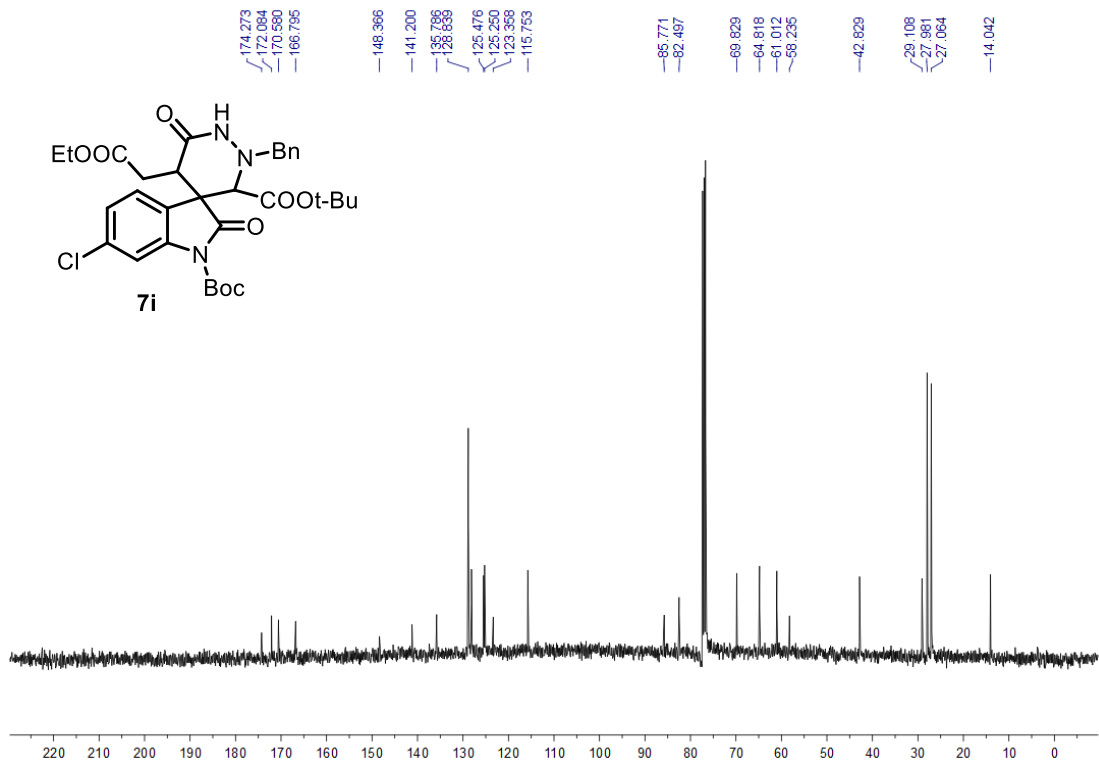

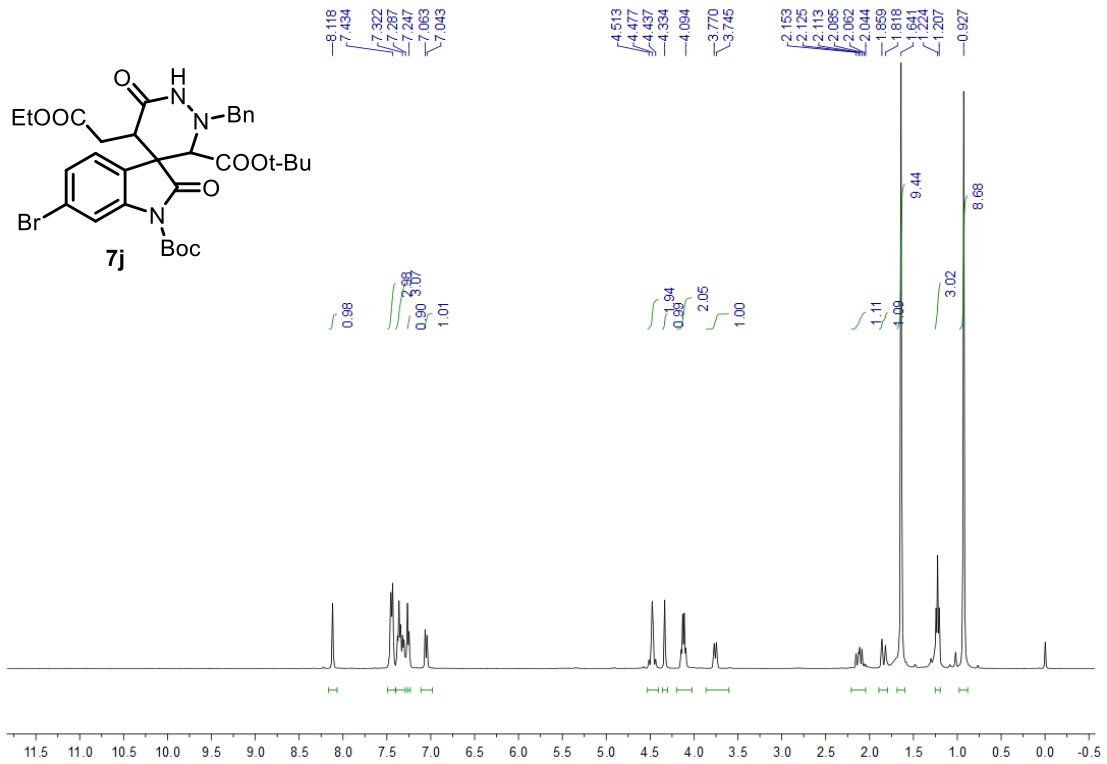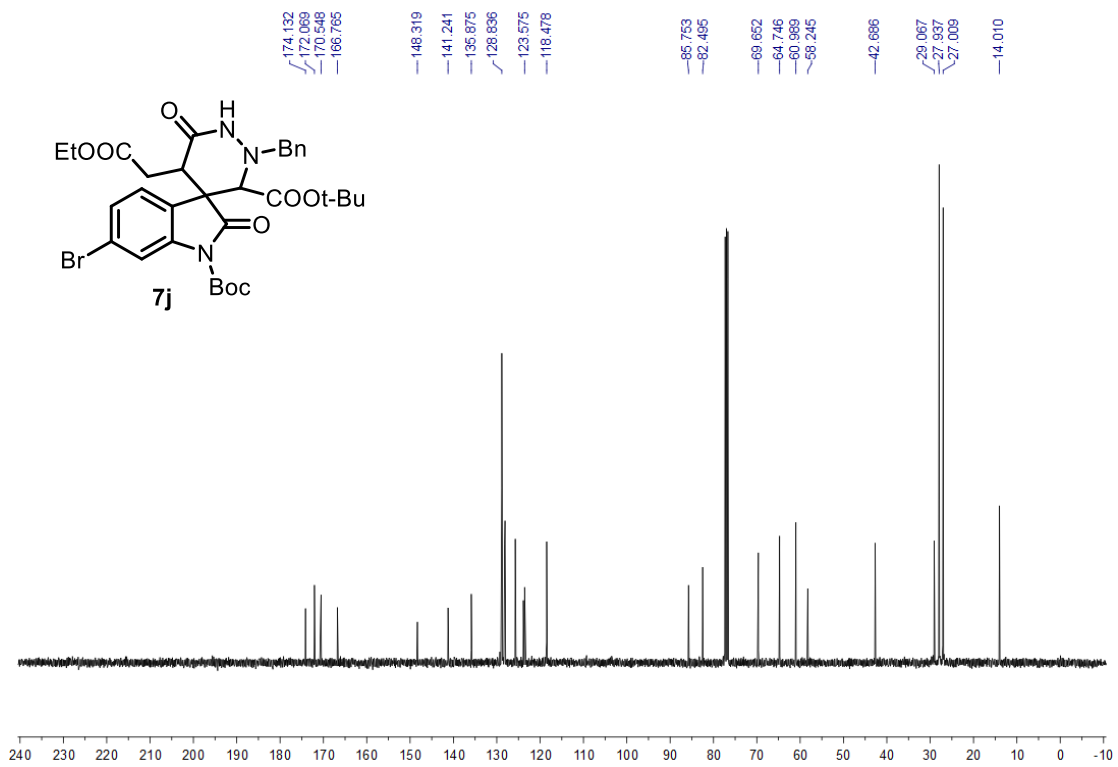

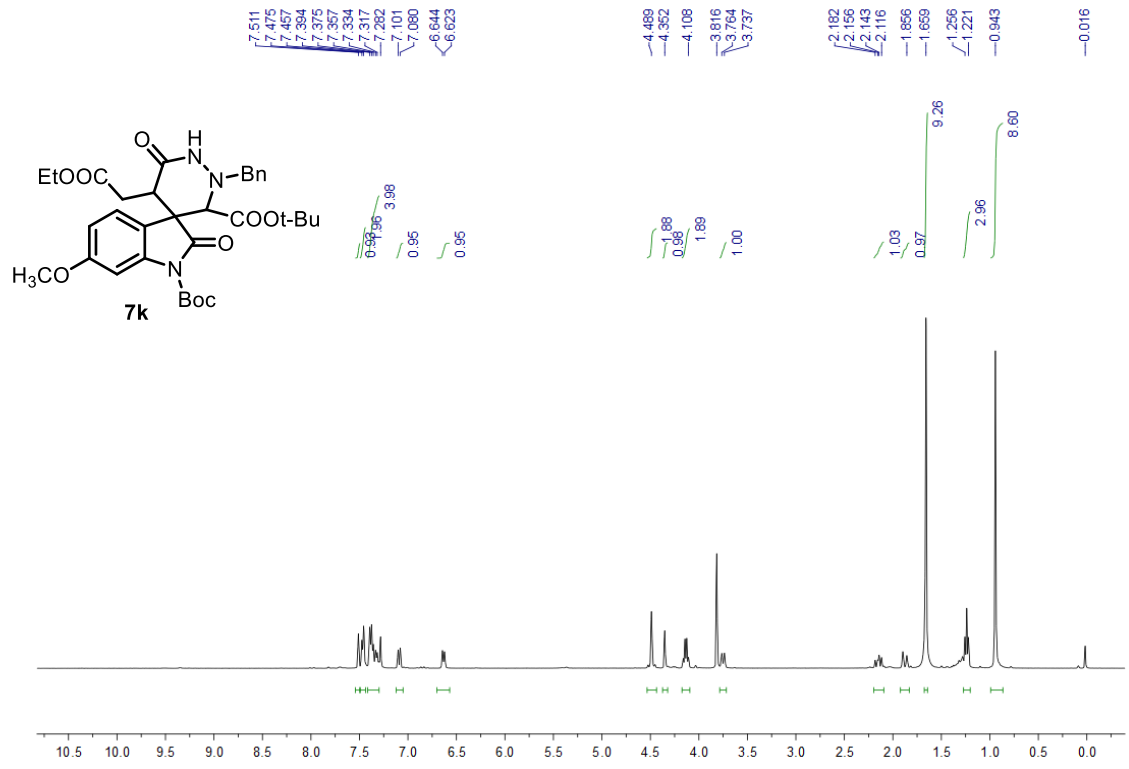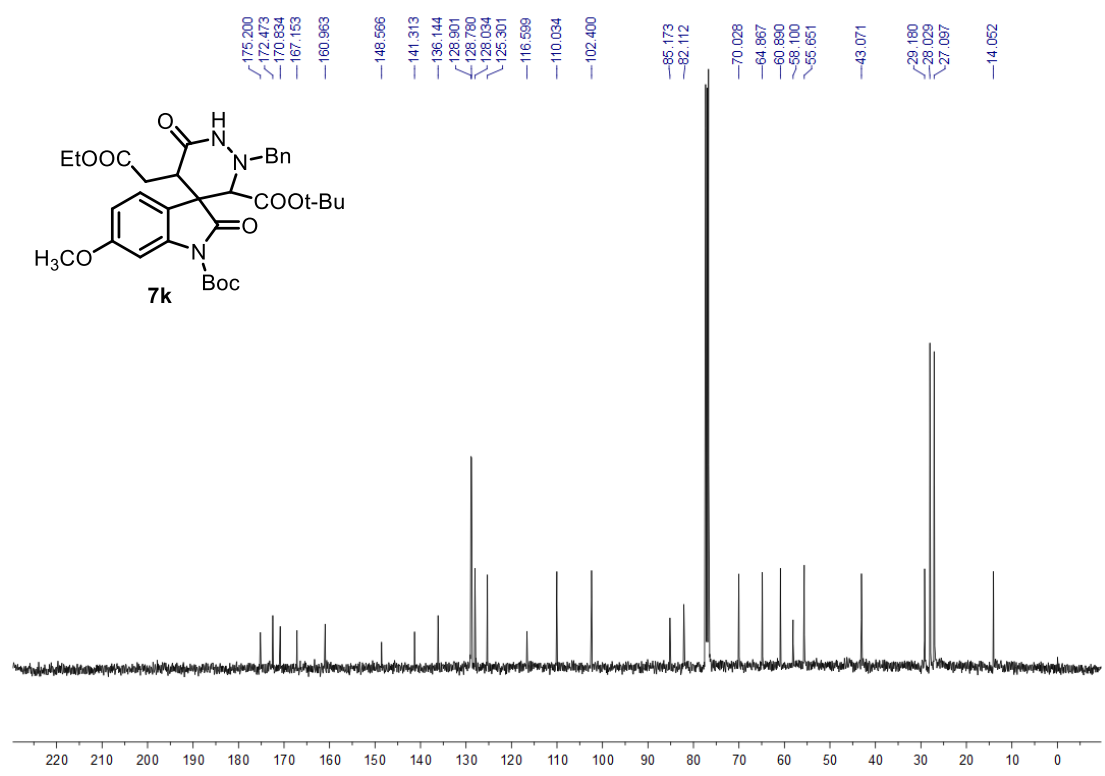

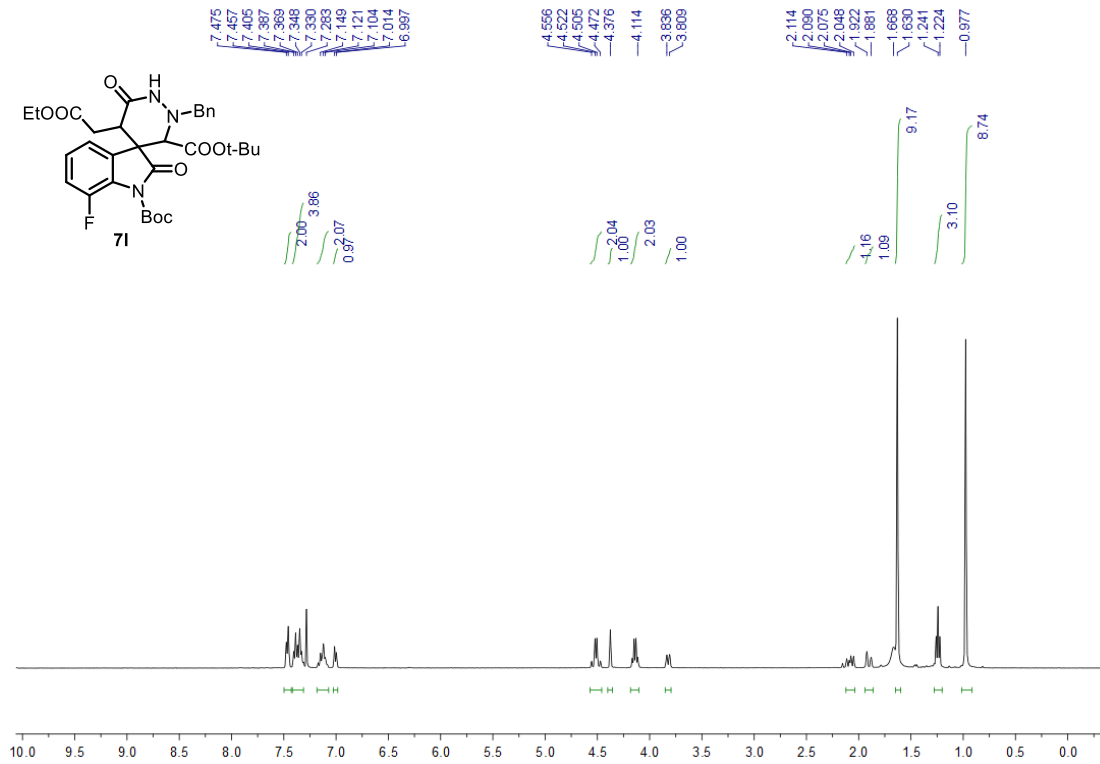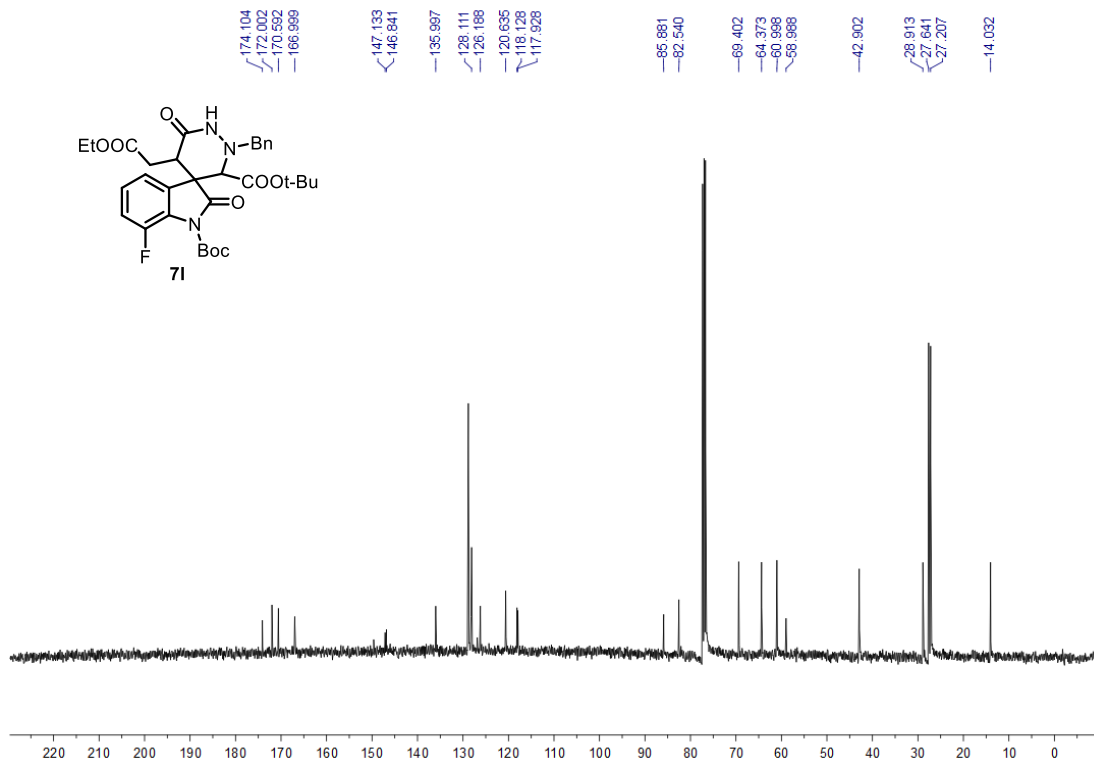

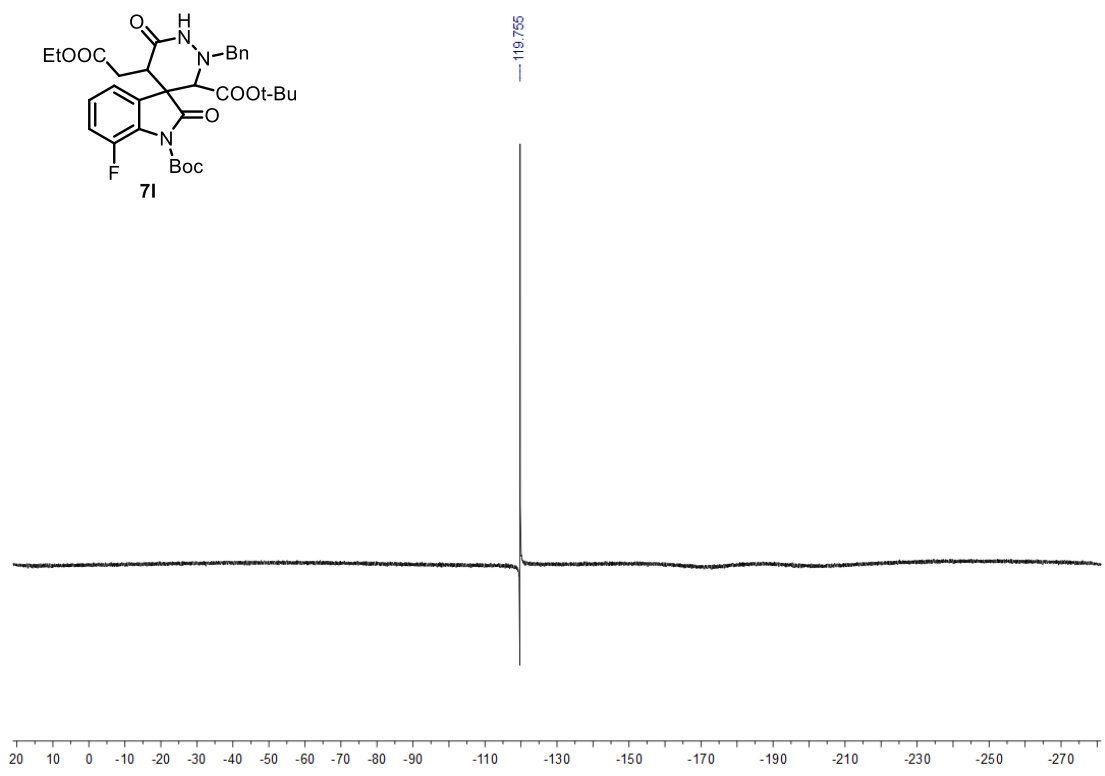

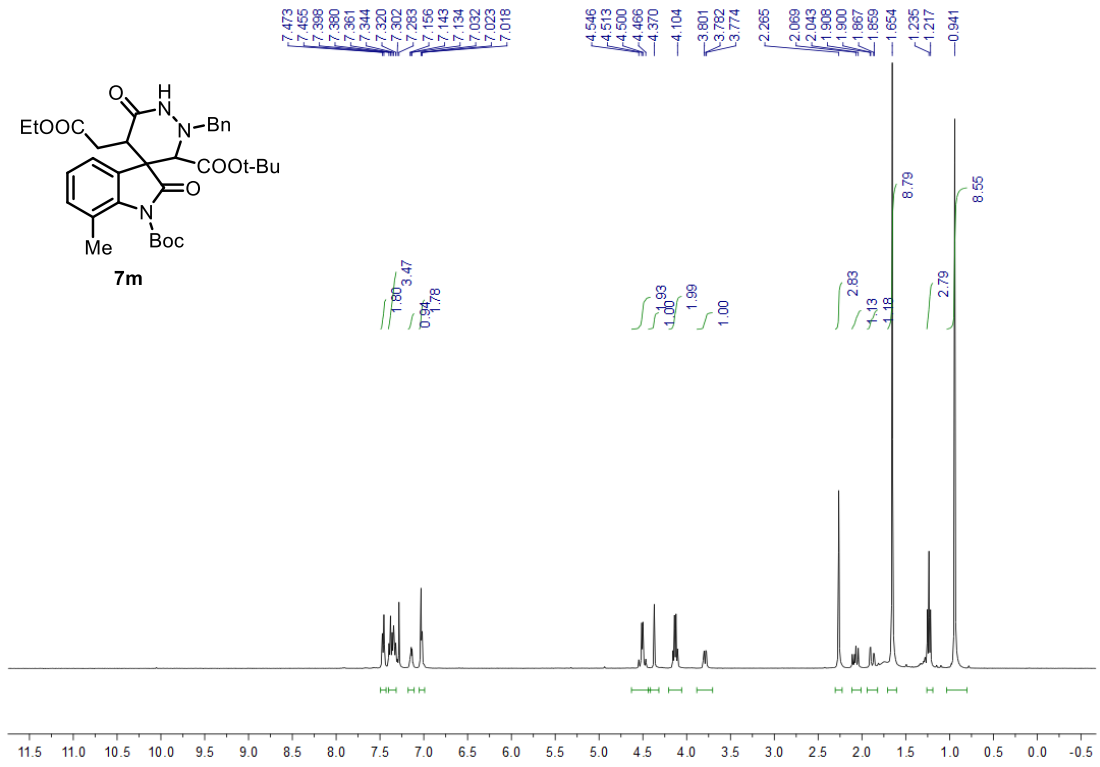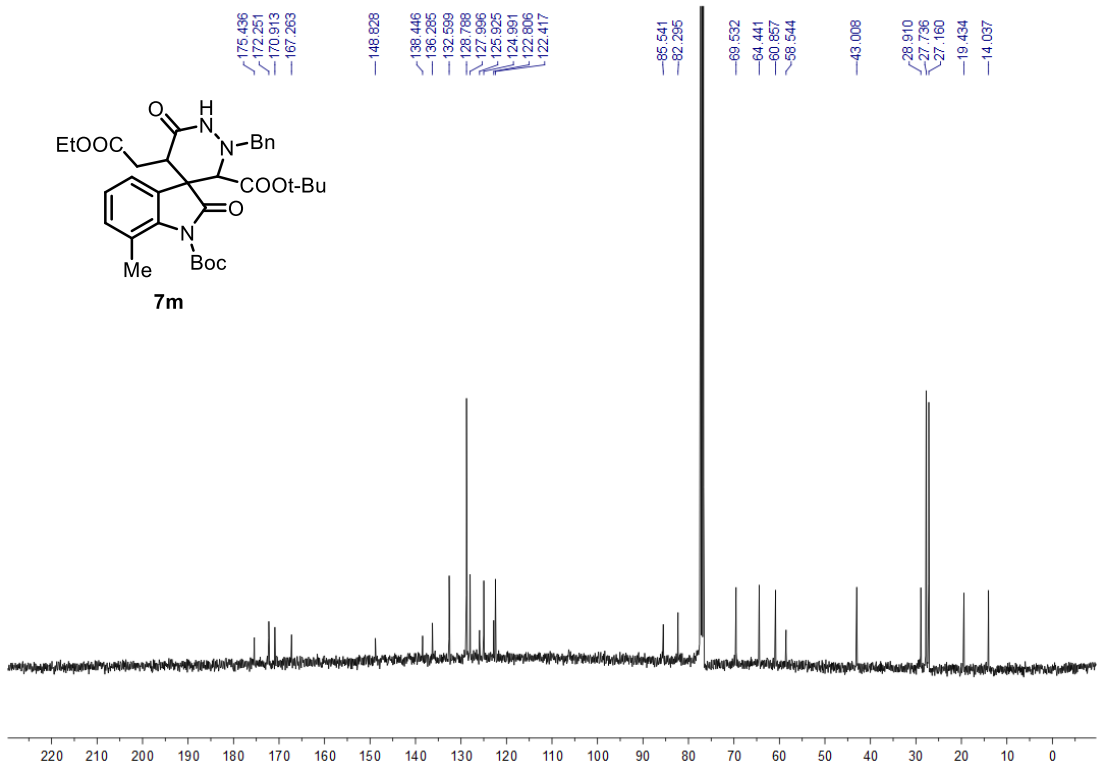



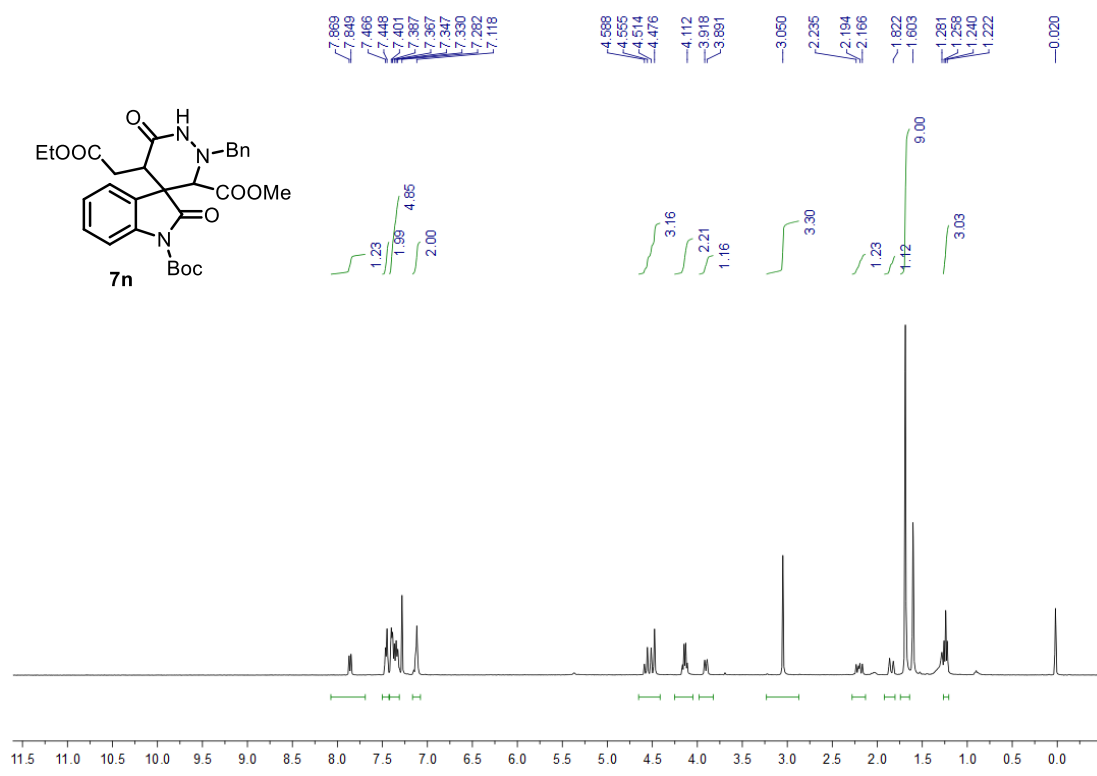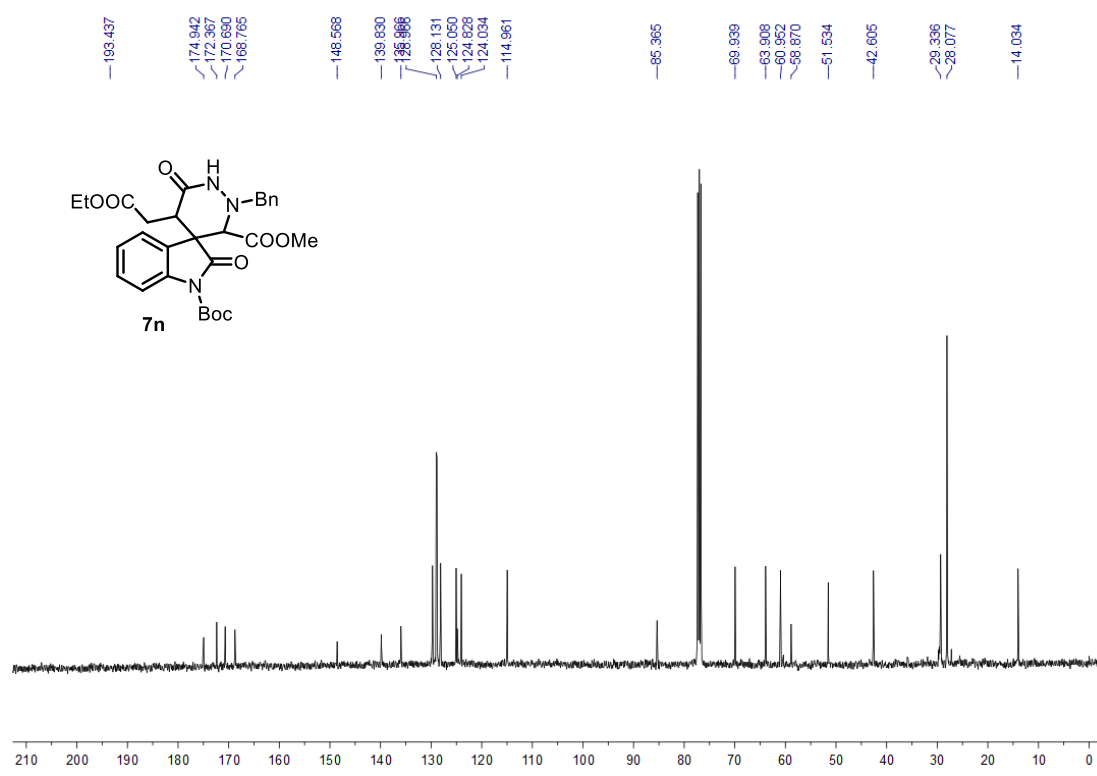

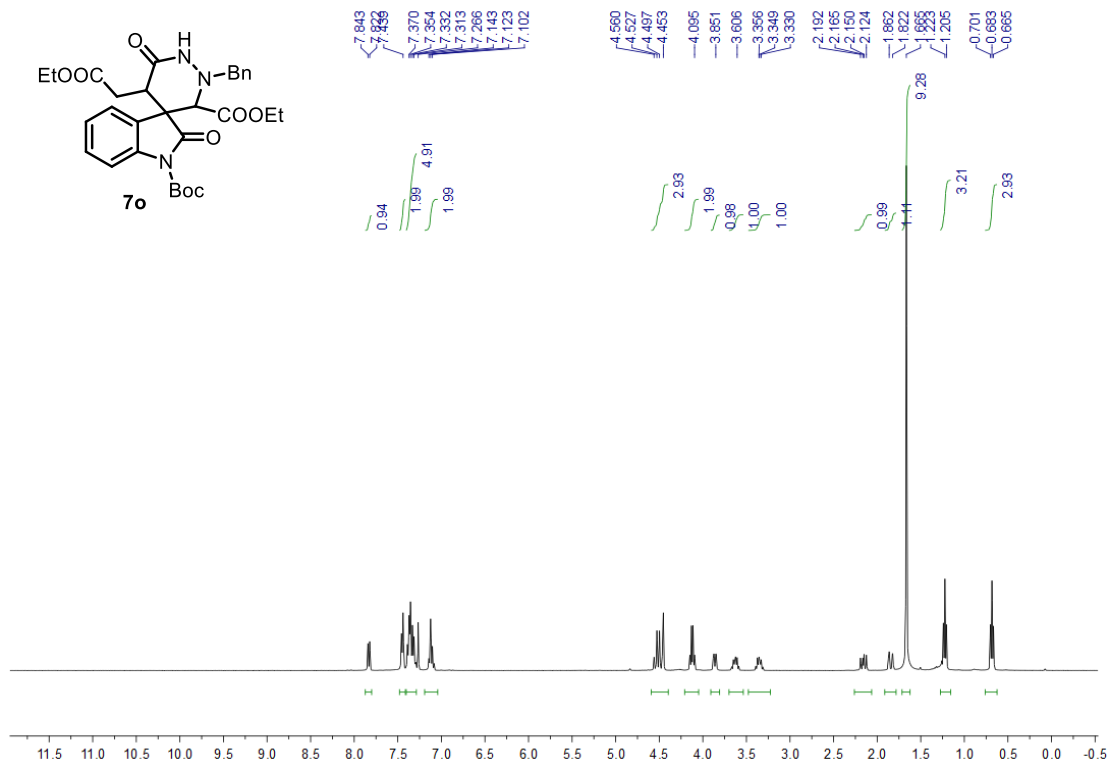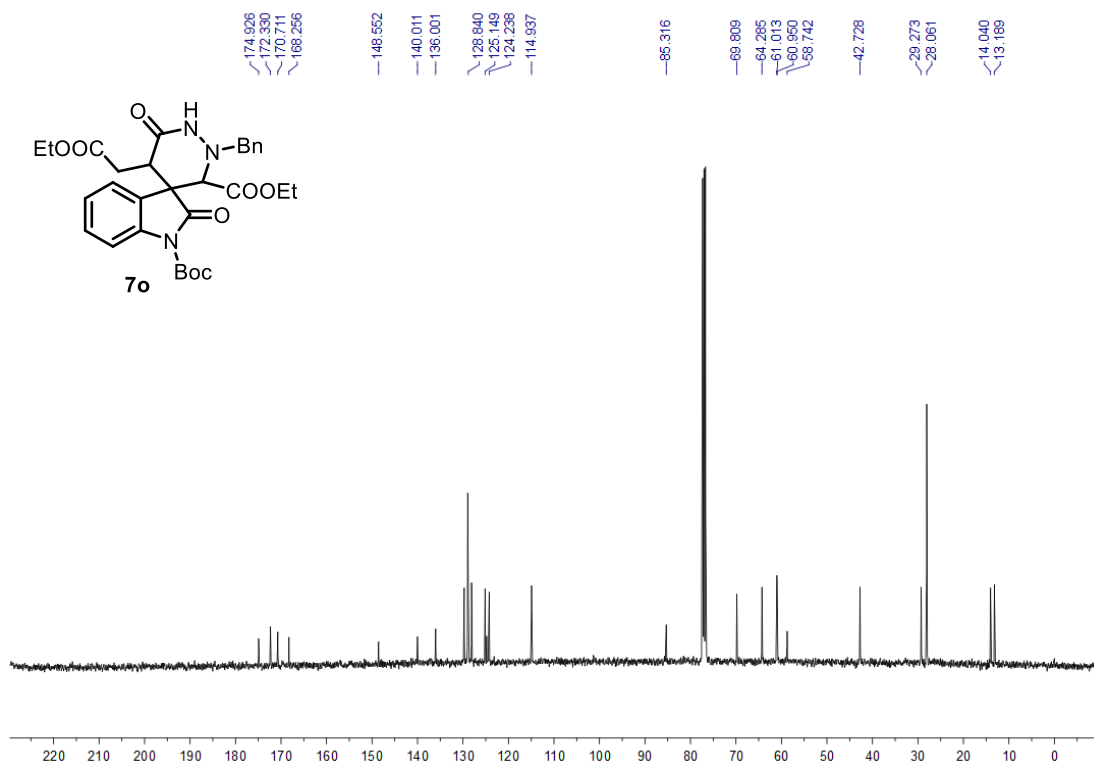

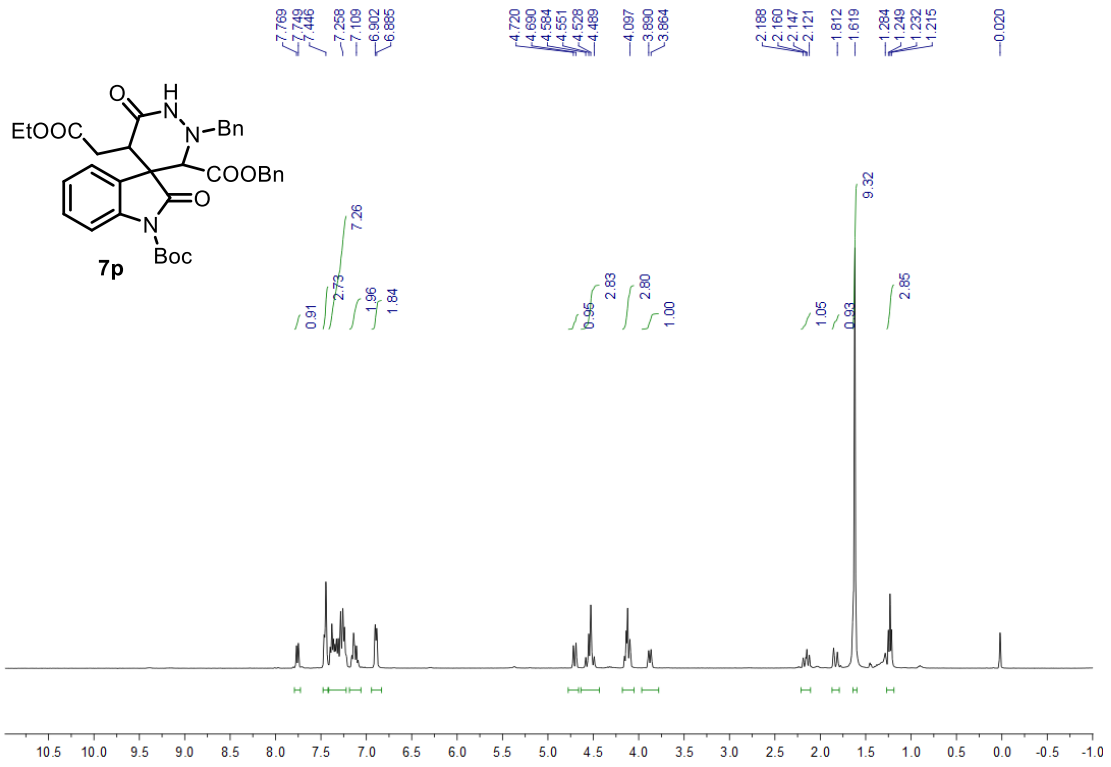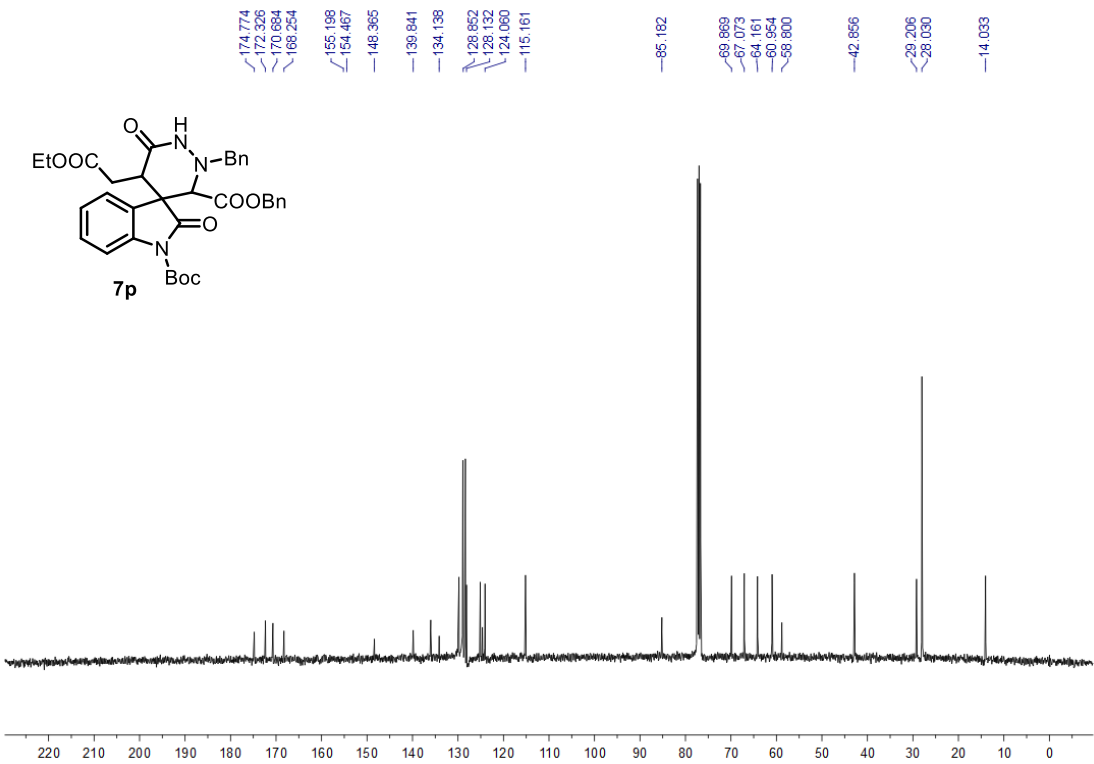

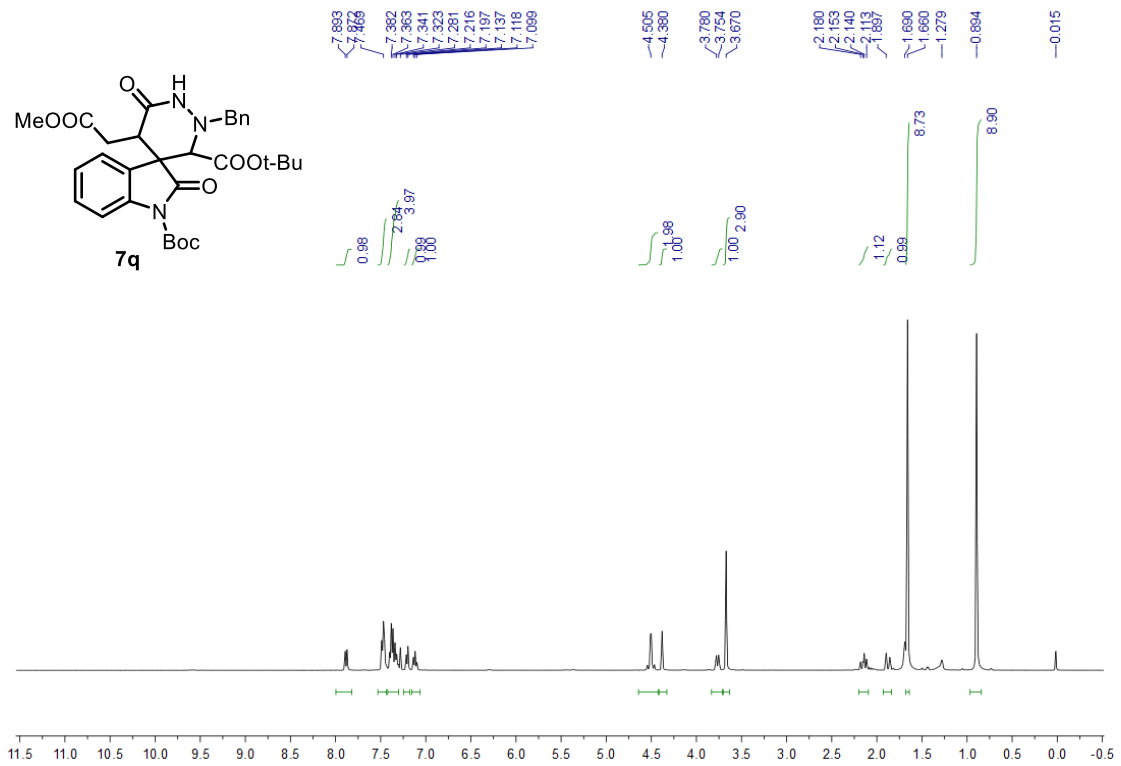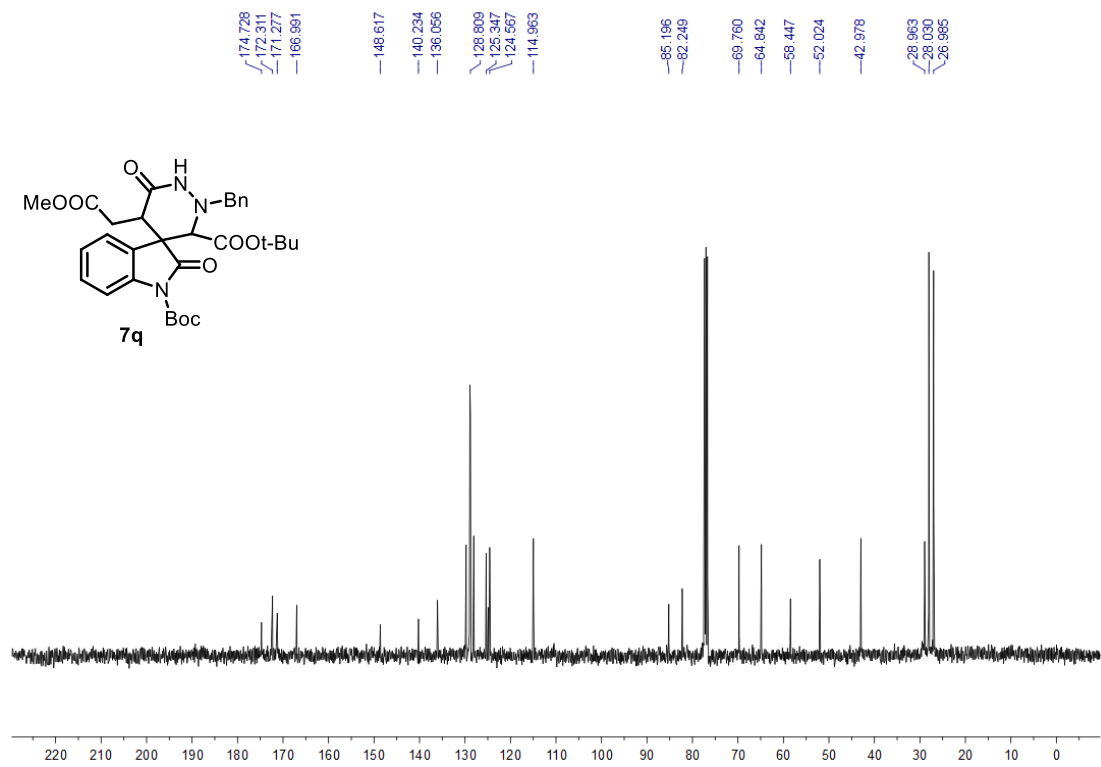

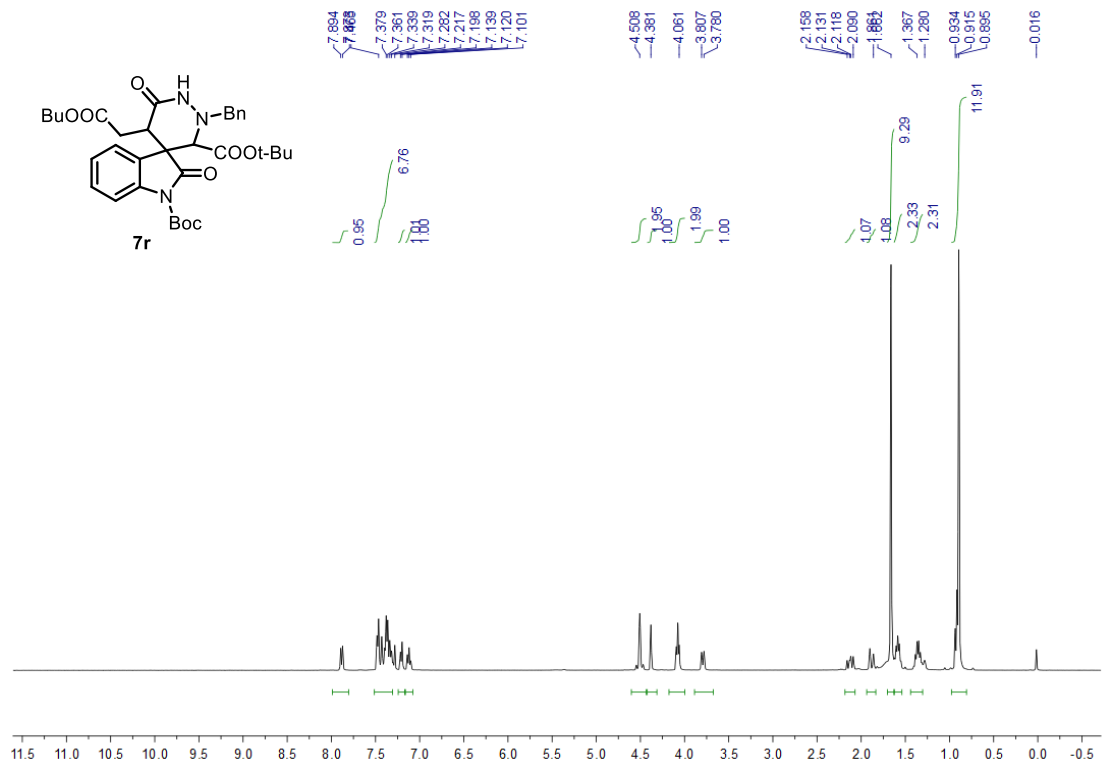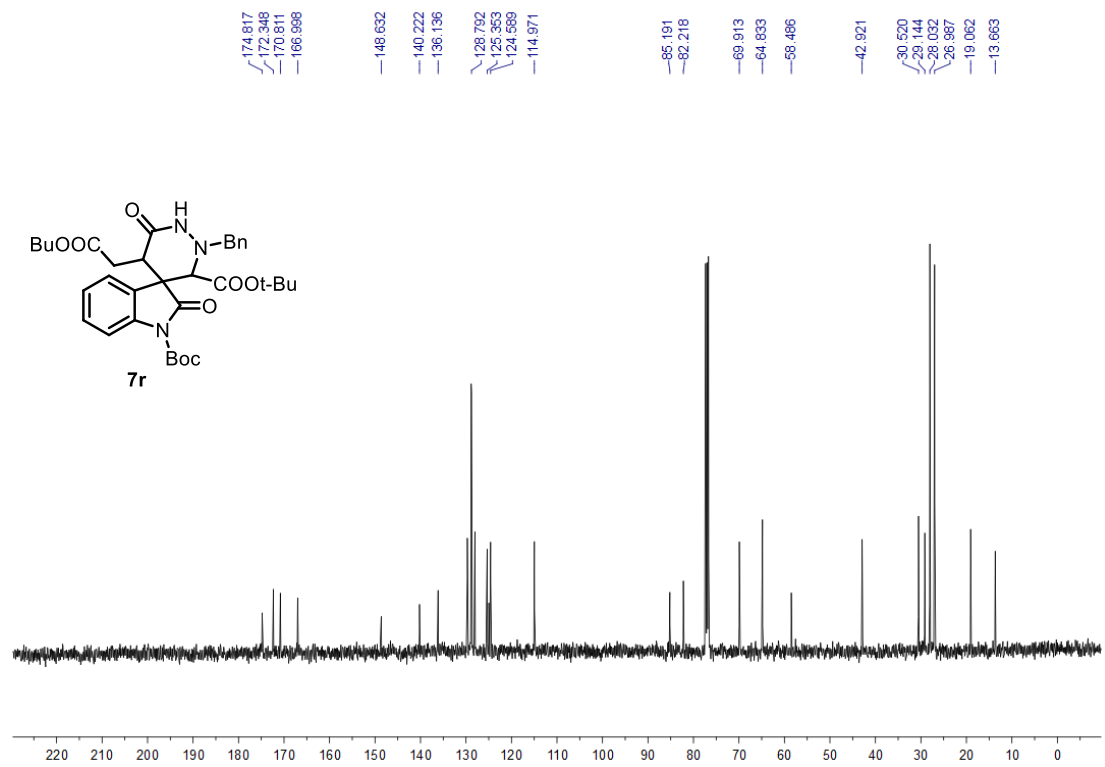

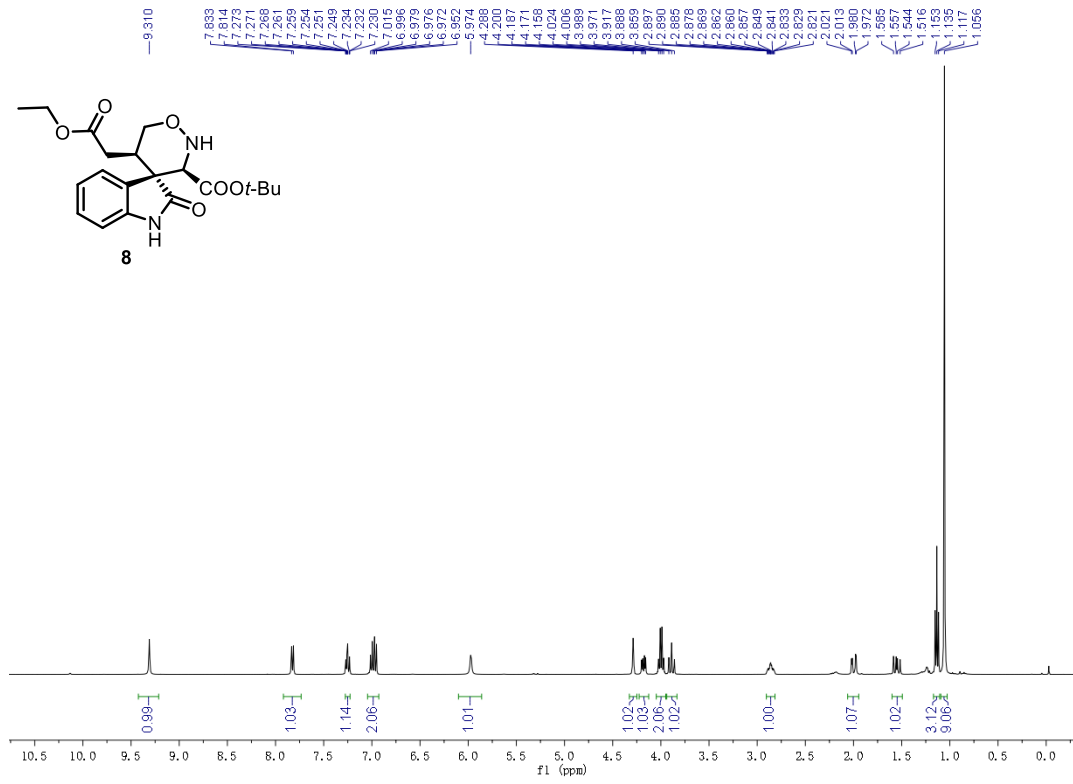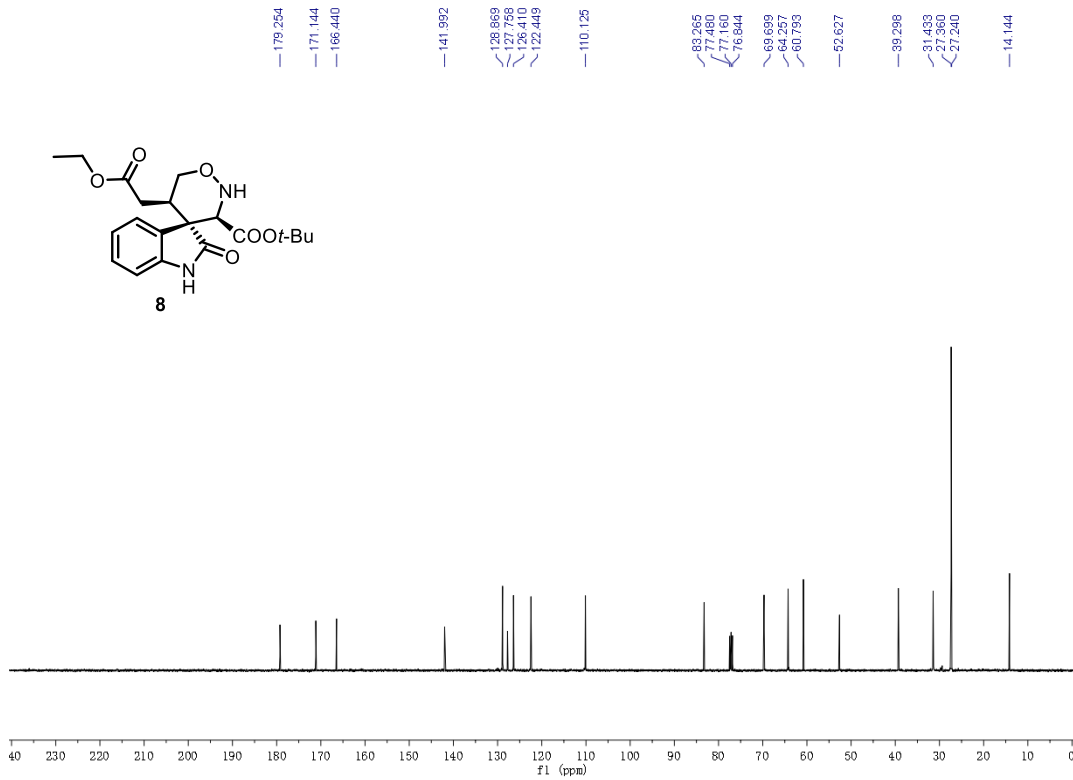

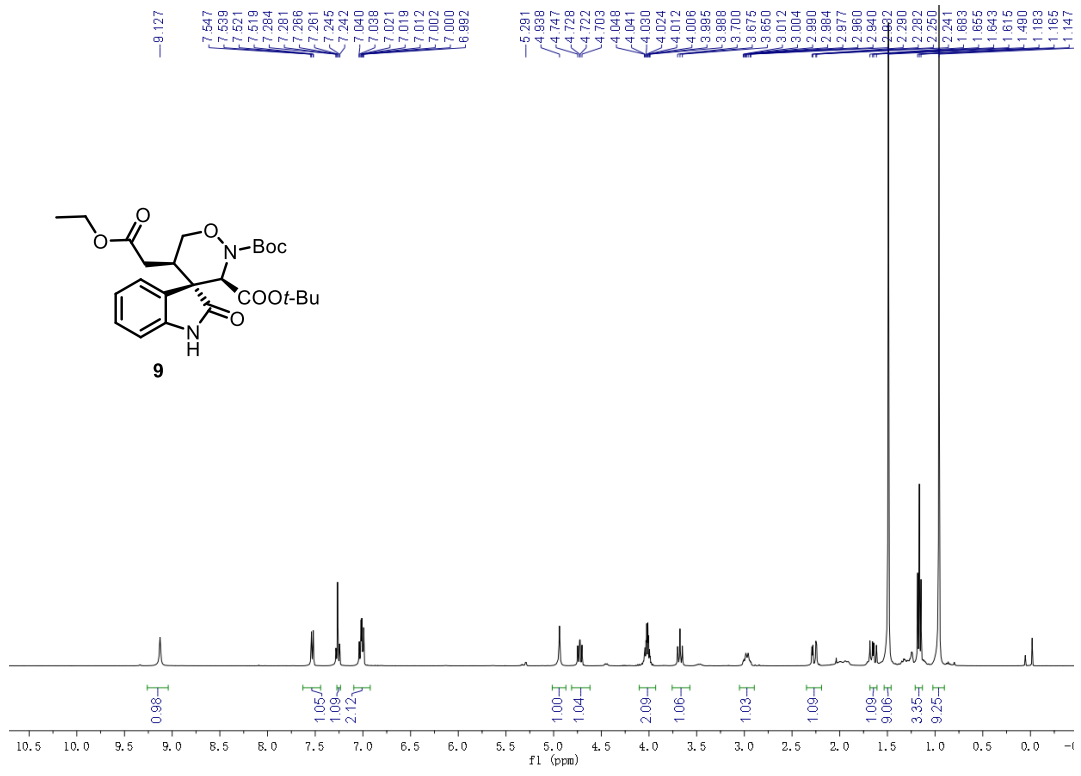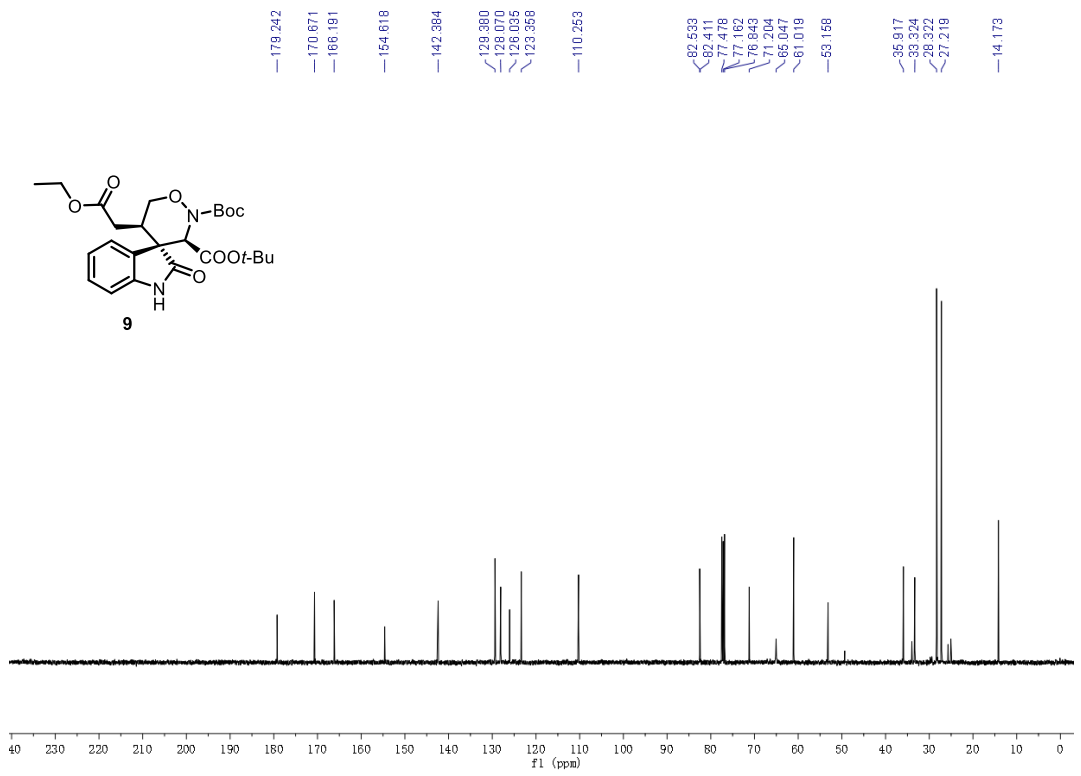

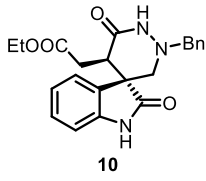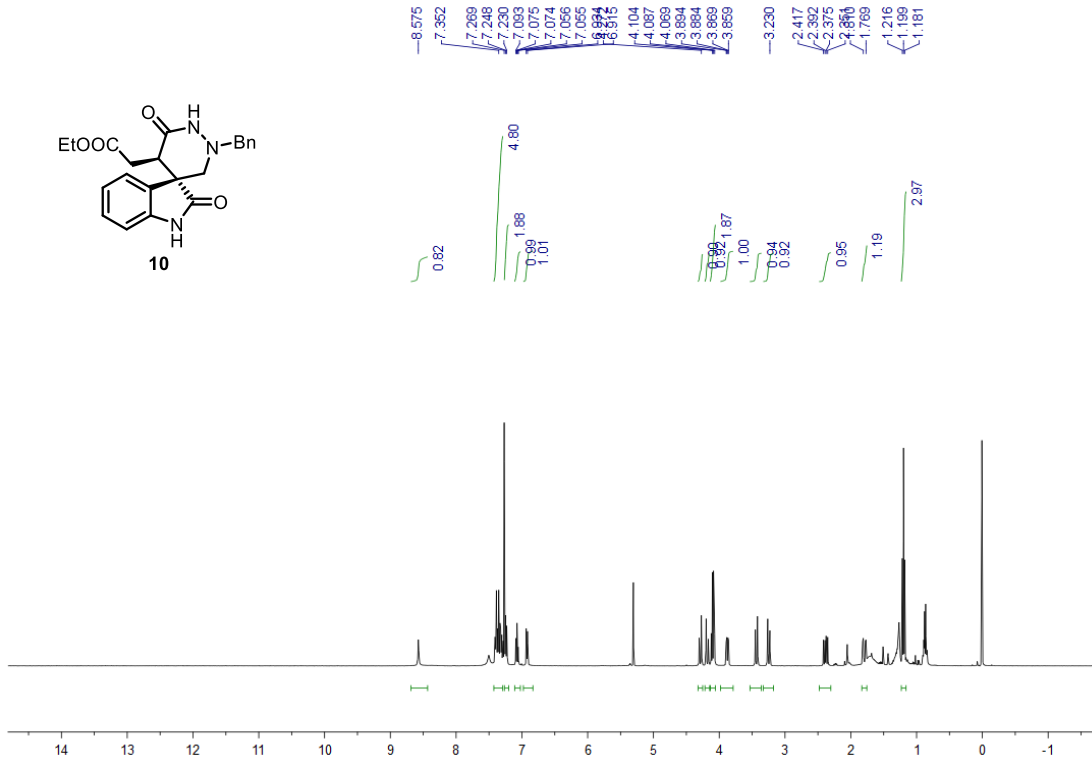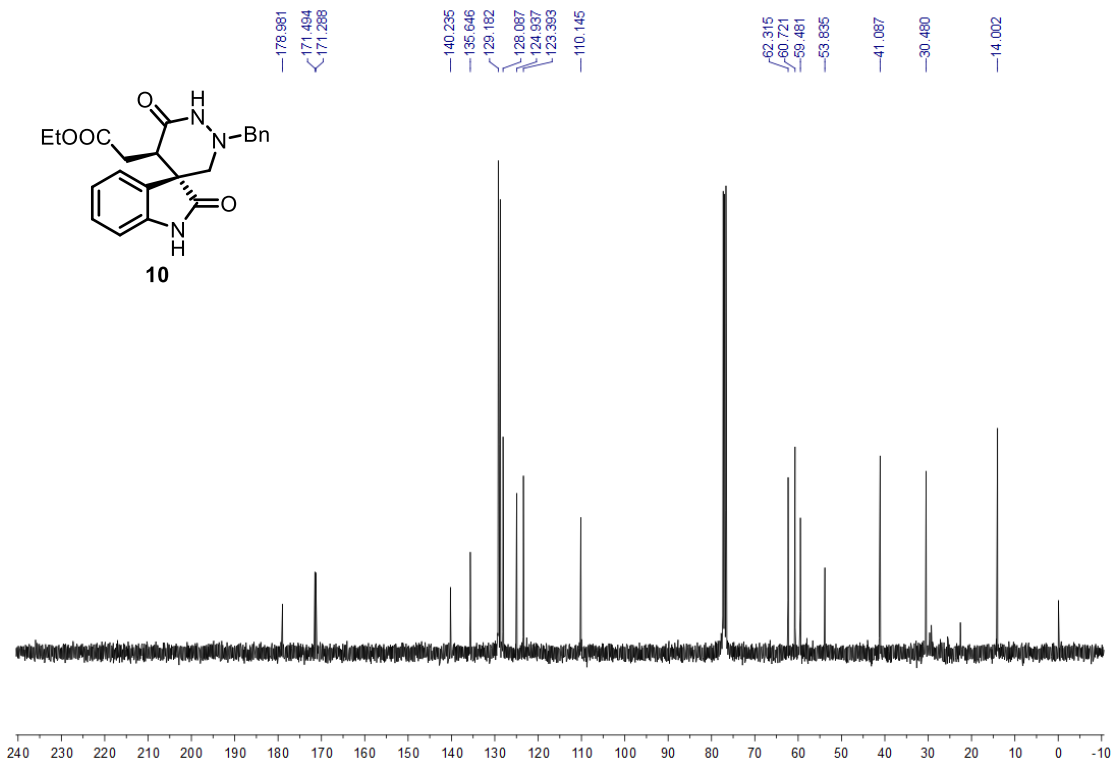



## 5. X-ray data of the product

Figure S1, X-ray crystal structure of 8 (The crystal was obtained by slow evaporation of the solution of diethyl ether and hexane)

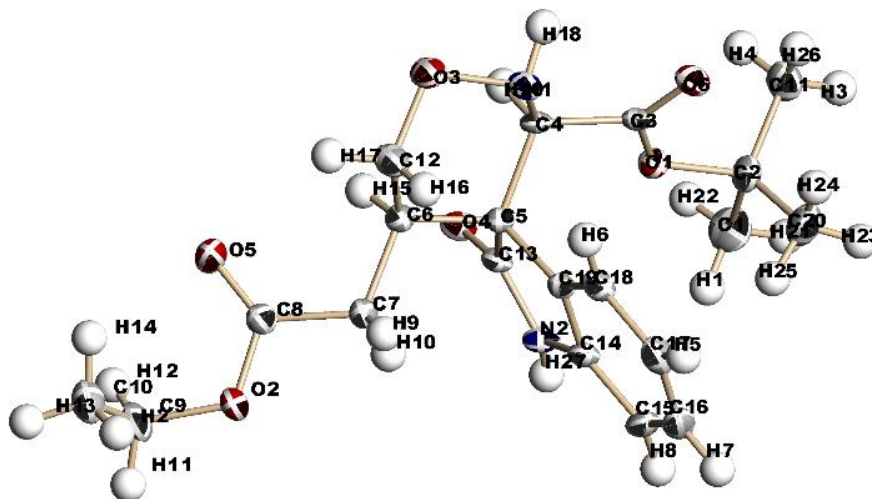

Table S1. Crystal data and structure refinement for CCDC 2153695.

|                                 |                                                               |          |
|---------------------------------|---------------------------------------------------------------|----------|
| Identification code             | 20190417tangQG                                                |          |
| Chemical formula                | C <sub>20</sub> H <sub>26</sub> N <sub>2</sub> O <sub>6</sub> |          |
| Formula weight                  | 390.43 g/mol                                                  |          |
| Temperature                     | 274(2) K                                                      |          |
| Wavelength                      | 1.54178 Å                                                     |          |
| Crystal size                    | 0.070 x 0.100 x 0.300 mm                                      |          |
| Crystal system                  | monoclinic                                                    |          |
| Space group                     | P 1 21 1                                                      |          |
| Unit cell dimensions            | a = 11.2293(6) Å                                              | α = 90°  |
|                                 | b = 8.1032(5) Å                                               | β = 101° |
|                                 | c = 11.2293(6) Å                                              | γ = 90°  |
| Volume                          | 1004.55(10) Å <sup>3</sup>                                    |          |
| Z                               | 2                                                             |          |
| Density (calculated)            | 1.291 g/cm <sup>3</sup>                                       |          |
| Absorption coefficient          | 0.793 mm <sup>-1</sup>                                        |          |
| F(000)                          | 416                                                           |          |
| Theta range for data collection | 4.00 to 72.85°                                                |          |
| Index ranges                    | -13 ≤ h ≤ 13, -10 ≤ k ≤ 7, -13 ≤ l ≤ 13                       |          |

|                                |                                                                                                                         |
|--------------------------------|-------------------------------------------------------------------------------------------------------------------------|
| Reflections collected          | 9600                                                                                                                    |
| Independent reflections        | 3056 [R(int) = 0.0591]                                                                                                  |
| Max. and min. transmission     | 0.9470 and 0.7970                                                                                                       |
| Structure solution technique   | direct methods                                                                                                          |
| Structure solution program     | SHELXT 2014/5 (Sheldrick, 2014)                                                                                         |
| Refinement method              | Full-matrix least-squares on F <sup>2</sup>                                                                             |
| Refinement program             | SHELXL-2018/3 (Sheldrick, 2018)                                                                                         |
| Function minimized             | $\Sigma w(F_o^2 - F_c^2)^2$                                                                                             |
| Data / restraints / parameters | 3056 / 1 / 265                                                                                                          |
| Goodness-of-fit on F2          | 1.091                                                                                                                   |
| Final R indices                | 2984 data; I>2 $\sigma$ (I) R1 = 0.0434, wR2 = 0.1008<br>all data R1 = 0.0439, wR2 = 0.1016                             |
| Weighting scheme               | w=1/[ $\sigma^2(F_o^2)+(0.0651P)^2+0.0605P$ ]<br>where P=(F <sub>o</sub> <sup>2</sup> +2F <sub>c</sub> <sup>2</sup> )/3 |
| Absolute structure parameter   | -0.02(14)                                                                                                               |
| Largest diff. peak and hole    | 0.334 and -0.256 eÅ <sup>-3</sup>                                                                                       |
| R.M.S. deviation from mean     | 0.058 eÅ <sup>-3</sup>                                                                                                  |

Figure S2, X-ray crystal structure of 7a (The crystal was obtained by slow evaporation of the solution of diethyl ether and hexane)

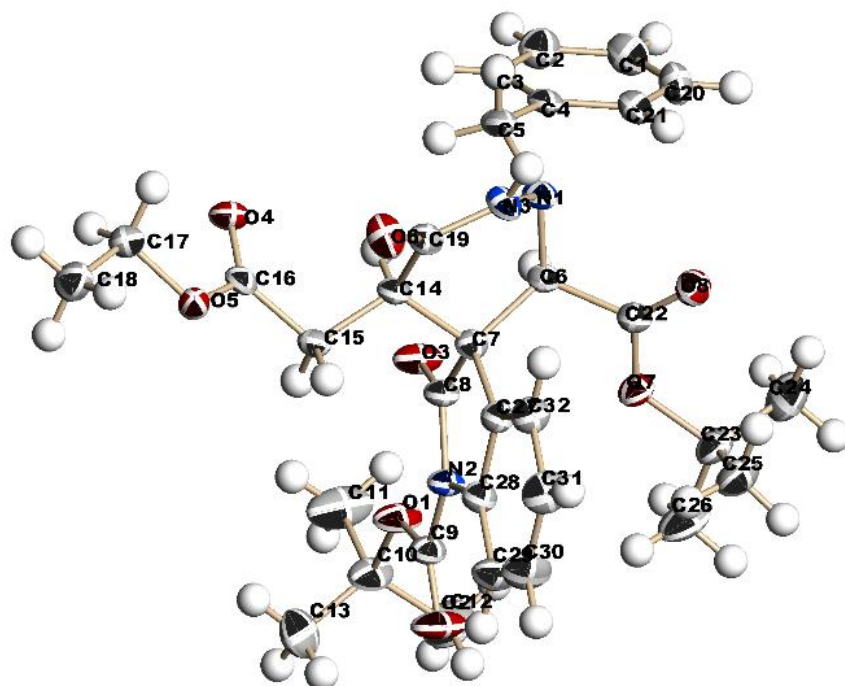

**Table S2. Crystal data and structure refinement for CCDC 2153627.**

|                                            |                                                                                                                                                                       |
|--------------------------------------------|-----------------------------------------------------------------------------------------------------------------------------------------------------------------------|
| <b>Identification code</b>                 | 20210409THZ_TBUDH                                                                                                                                                     |
| <b>Chemical formula</b>                    | C <sub>32</sub> H <sub>39</sub> N <sub>3</sub> O <sub>8</sub>                                                                                                         |
| <b>Formula weight</b>                      | 593.66 g/mol                                                                                                                                                          |
| <b>Temperature</b>                         | 293(2) K                                                                                                                                                              |
| <b>Wavelength</b>                          | 1.54184 Å                                                                                                                                                             |
| <b>Crystal size</b>                        | 0.100 x 0.130 x 0.200 mm                                                                                                                                              |
| <b>Crystal system</b>                      | monoclinic                                                                                                                                                            |
| <b>Space group</b>                         | P 1 21 1                                                                                                                                                              |
| <b>Unit cell dimensions</b>                | a = 12.891(6) Å      α = 90°<br>b = 8.629(5) Å      β = 111.57(2)°<br>c = 15.510(7) Å      γ = 90°                                                                    |
| <b>Volume</b>                              | 1604.5(14) Å <sup>3</sup>                                                                                                                                             |
| <b>Z</b>                                   | 2                                                                                                                                                                     |
| <b>Density (calculated)</b>                | 1.229 g/cm <sup>3</sup>                                                                                                                                               |
| <b>Absorption coefficient</b>              | 0.730 mm <sup>-1</sup>                                                                                                                                                |
| <b>F(000)</b>                              | 632                                                                                                                                                                   |
| <b>Theta range for data collection</b>     | 3.69 to 65.01°                                                                                                                                                        |
| <b>Index ranges</b>                        | -15 ≤ h ≤ 15, -10 ≤ k ≤ 10, -18 ≤ l ≤ 18                                                                                                                              |
| <b>Reflections collected</b>               | 19779                                                                                                                                                                 |
| <b>Independent reflections</b>             | 5367 [R(int) = 0.0869]                                                                                                                                                |
| <b>Coverage of independent reflections</b> | 99.9%                                                                                                                                                                 |
| <b>Absorption correction</b>               | Multi-Scan                                                                                                                                                            |
| <b>Max. and min. transmission</b>          | 0.7526 and 0.6068                                                                                                                                                     |
| <b>Structure solution technique</b>        | direct methods                                                                                                                                                        |
| <b>Structure solution program</b>          | SHELXT 2018/2 (Sheldrick, 2018)                                                                                                                                       |
| <b>Refinement method</b>                   | Full-matrix least-squares on F <sup>2</sup>                                                                                                                           |
| <b>Refinement program</b>                  | SHELXL-2018/3 (Sheldrick, 2018)                                                                                                                                       |
| <b>Function minimized</b>                  | Σ w(F <sub>o</sub> <sup>2</sup> - F <sub>c</sub> <sup>2</sup> ) <sup>2</sup>                                                                                          |
| <b>Data / restraints / parameters</b>      | 5367 / 1 / 398                                                                                                                                                        |
| <b>Goodness-of-fit on F<sup>2</sup></b>    | 1.062                                                                                                                                                                 |
| <b>Final R indices</b>                     | 4848 data; I > 2σ(I)      R1 = 0.0332, wR2 = 0.0803<br>all data                      R1 = 0.0474, wR2 = 0.0836                                                        |
| <b>Weighting scheme</b>                    | w = 1/[σ <sup>2</sup> (F <sub>o</sub> <sup>2</sup> ) + (0.0338P) <sup>2</sup> + 0.1266P]<br>where P = (F <sub>o</sub> <sup>2</sup> + 2F <sub>c</sub> <sup>2</sup> )/3 |
| <b>Absolute structure parameter</b>        | 0.14(11)                                                                                                                                                              |

|                                    |                                   |
|------------------------------------|-----------------------------------|
| <b>Largest diff. peak and hole</b> | 0.159 and -0.150 eÅ <sup>-3</sup> |
| <b>R.M.S. deviation from mean</b>  | 0.037 eÅ <sup>-3</sup>            |
